# Supplementary material for: Solvent-free N-iodosuccinimide-promoted synthesis of spiroimidazolines from alkenes and amidines under ball-milling conditions
Source: Royal Society of Chemistry journal article supplement (doi:10.1039/c8qo00723c), 2018-01-01
Supplement: c8qo00723c1.pdf [file c8qo00723c1.pdf]

## Electronic Supplementary Information

### Solvent-free *N*-iodosuccinimide-promoted synthesis of spiroimidazolines from alkenes and amidines under ball-milling conditions

Hui Xu,<sup>a</sup> Kuan Chen,<sup>a</sup> Hong-Wei Liu<sup>a</sup> and Guan-Wu Wang<sup>\*a,b</sup>

<sup>a</sup> CAS Key Laboratory of Soft Matter Chemistry, iChEM (Collaborative Innovation Center of Chemistry for Energy Materials), Hefei National Laboratory for Physical Sciences at Microscale, and Department of Chemistry, University of Science and Technology of China, Hefei, Anhui 230026, P. R. China.

<sup>b</sup> State Key Laboratory of Applied Organic Chemistry, Lanzhou University, Lanzhou, Gansu 730000, P. R. China

E-mail: [gwang@ustc.edu.cn](mailto:gwang@ustc.edu.cn)

#### Table of contents

|                                                                 |      |
|-----------------------------------------------------------------|------|
| 1. General information                                          | S2   |
| 2. Synthesis and characterization of <b>3</b> and <b>5</b>      | S2   |
| 3. Typical procedure for the gram-scale synthesis of <b>3aa</b> | S15  |
| 4. Synthesis and characterization of <b>6aa</b>                 | S15  |
| 5. NMR spectra of <b>3</b> , <b>5</b> and <b>6aa</b>            | S17  |
| 6. Single-crystal X-ray crystallography of <b>3la</b>           | S110 |

## 1. General information

All reagents were obtained from commercial sources and used without further purification. NMR spectra were recorded on a 400 MHz NMR spectrometer (400 MHz for  $^1\text{H}$  NMR; 101 MHz for  $^{13}\text{C}$  NMR).  $^1\text{H}$  NMR chemical shifts were determined relative to internal TMS at  $\delta$  0.0 ppm.  $^{13}\text{C}$  NMR chemical shifts were determined relative to  $\text{CDCl}_3$  at  $\delta$  77.16 ppm. Data for  $^1\text{H}$  NMR and  $^{13}\text{C}$  NMR are reported as follows: chemical shift ( $\delta$ , ppm), multiplicity (s = singlet, d = doublet, t = triplet, m = multiplet, sept = septet). High-resolution mass spectra (HRMS) were measured with ESI-TOF in a positive mode. Ball-milling reactions were performed in a MM400 mixer mill (Retsch GmbH, Haan, Germany).

## 2. Synthesis and characterization of 3 and 5

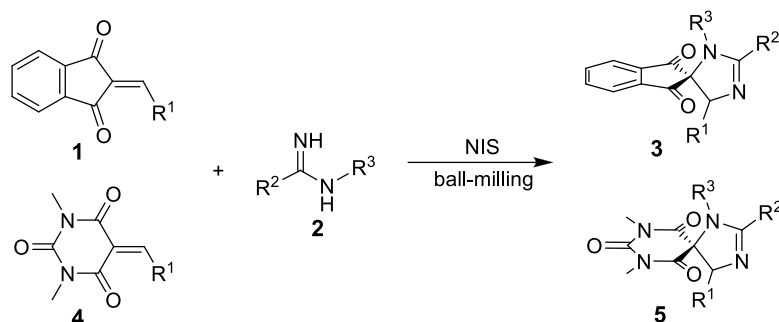

A mixture of alkenes (0.2 mmol), amidines (0.3 mmol) and NIS (0.24 mmol) together with a stainless ball (10 mm in diameter) were introduced into a stainless steel jar (10 mL). The reaction vessel along with another identical empty vessel was closed and fixed on the vibration arms of a Retsch MM400 mixer mill, and was vibrated vigorously at a rate of 1800 rounds per minute (30 Hz) at room temperature for 20 min. After completion of the reaction, the reaction vessel was washed with acetone three times ( $3 \times 6$  mL), and the combined solution was evaporated to remove the solvent in vacuo. The residue was separated by flash column chromatography on silica gel with acetone/petroleum ether as the eluent to afford spiroimidazolines.

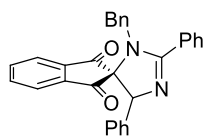

**3-Benzyl-2,5-diphenyl-3,5-dihydrospiro[imidazole-4,2'-indene]-1,3'-dione (3aa).** General procedure was followed to afford **3aa** as a yellow solid (79.4 mg, 90% yield);  $^1\text{H}$  NMR (400 MHz,  $\text{CDCl}_3$ )  $\delta$  7.87–7.81 (m, 2H), 7.73 (d,  $J = 7.5$  Hz, 1H), 7.67 (td,  $J = 7.4, 1.0$  Hz, 1H), 7.61 (td,  $J = 7.4, 1.2$  Hz, 1H), 7.53–7.45 (m, 3H), 7.40 (d,  $J = 7.5$  Hz, 1H), 7.13–6.94 (m, 10H), 5.60 (s, 1H), 4.59 (d,  $J = 14.8$  Hz, 1H), 4.11 (d,  $J = 14.8$  Hz, 1H);  $^{13}\text{C}$  NMR (101 MHz,  $\text{CDCl}_3$ )  $\delta$  199.4, 196.0, 167.4, 141.1, 140.9, 136.9, 136.1, 135.54, 135.49, 130.6, 130.4, 129.4 (2C), 128.8 (2C), 128.7 (2C), 128.1 (2C), 127.95 (4C), 127.92, 127.8, 123.0, 122.9, 80.3, 79.8, 50.6; HRMS (ESI-TOF) calcd for  $\text{C}_{30}\text{H}_{23}\text{N}_2\text{O}_2$   $[\text{M} + \text{H}]^+$  443.1760, found 443.1761.

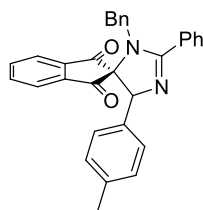

**3-Benzyl-2-phenyl-5-*p*-tolyl-3,5-dihydrospiro[imidazole-4,2'-indene]-1',3'-dione (3ba).**

General procedure was followed to afford **3ba** as a yellow solid (74.0 mg, 81% yield); <sup>1</sup>H NMR (400 MHz, CDCl<sub>3</sub>) δ 7.87–7.80 (m, 2H), 7.73 (d, *J* = 7.2 Hz, 1H), 7.67 (td, *J* = 7.3, 1.0 Hz, 1H), 7.62 (td, *J* = 7.3, 1.0 Hz, 1H), 7.52–7.45 (m, 3H), 7.43 (d, *J* = 7.4 Hz, 1H), 7.06–6.95 (m, 5H), 6.88 (d, *J* = 8.1 Hz, 2H), 6.84 (d, *J* = 8.1 Hz, 2H), 5.57 (s, 1H), 4.58 (d, *J* = 14.8 Hz, 1H), 4.11 (d, *J* = 14.8 Hz, 1H), 2.20 (s, 3H); <sup>13</sup>C NMR (101 MHz, CDCl<sub>3</sub>) δ 199.5, 196.1, 167.2, 141.1, 141.0, 137.4, 136.0, 135.53, 135.48, 133.9, 130.6, 130.4, 129.4 (2C), 128.9 (2C), 128.71 (2C), 128.65 (2C), 128.1 (2C), 127.9, 127.8 (2C), 123.0, 122.9, 80.2, 79.6, 50.6, 21.2; HRMS (ESI-TOF) calcd for C<sub>31</sub>H<sub>25</sub>N<sub>2</sub>O<sub>2</sub> [M + H]<sup>+</sup> 457.1916, found 457.1926.

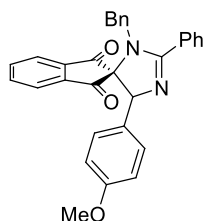

**3-Benzyl-5-(4-methoxyphenyl)-2-phenyl-3,5-dihydrospiro[imidazole-4,2'-indene]-1',3'-dione (3ca).**

General procedure was followed to afford **3ca** as a yellow solid (71.0 mg, 75% yield); <sup>1</sup>H NMR (400 MHz, CDCl<sub>3</sub>) δ 7.86–7.80 (m, 2H), 7.74–7.71 (m, 1H), 7.67 (td, *J* = 7.3, 1.2 Hz, 1H), 7.62 (td, *J* = 7.3, 1.4 Hz, 1H), 7.52–7.46 (m, 3H), 7.46–7.42 (m, 1H), 7.06–6.96 (m, 5H), 6.88 (d, *J* = 8.7 Hz, 2H), 6.61 (d, *J* = 8.7 Hz, 2H), 5.55 (s, 1H), 4.59 (d, *J* = 14.8 Hz, 1H), 4.12 (d, *J* = 14.8 Hz, 1H), 3.69 (s, 3H); <sup>13</sup>C NMR (101 MHz, CDCl<sub>3</sub>) δ 199.5, 196.1, 167.1, 159.1, 141.1, 140.9, 136.1, 135.52, 135.50, 130.6, 130.4, 129.4 (2C), 129.14 (2C), 129.05, 128.8 (2C), 128.7 (2C), 128.1 (2C), 127.9, 123.0, 122.9, 113.3 (2C), 80.4, 79.5, 55.2, 50.6; HRMS (ESI-TOF) calcd for C<sub>31</sub>H<sub>25</sub>N<sub>2</sub>O<sub>3</sub> [M + H]<sup>+</sup> 473.1865, found 473.1878.

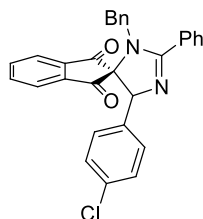

**3-Benzyl-5-(4-chlorophenyl)-2-phenyl-3,5-dihydrospiro[imidazole-4,2'-indene]-1',3'-dione (3da).**

General procedure was followed to afford **3da** as a yellow solid (79.9 mg, 84% yield); <sup>1</sup>H NMR (400 MHz, CDCl<sub>3</sub>) δ 7.86–7.79 (m, 2H), 7.74–7.71 (m, 1H), 7.69 (td, *J* = 7.0, 1.3 Hz, 1H), 7.65 (td, *J* = 7.0, 1.6 Hz, 1H), 7.53–7.44 (m, 4H), 7.06 (d, *J* = 8.4 Hz, 2H), 7.04–6.95 (m, 5H), 6.91 (d, *J* = 8.4 Hz, 2H), 5.56 (s, 1H), 4.58 (d, *J* = 14.8 Hz, 1H), 4.11 (d, *J* = 14.8 Hz, 1H); <sup>13</sup>C NMR (101 MHz, CDCl<sub>3</sub>) δ 199.2, 195.9, 167.6, 141.1, 140.8, 136.3, 135.8, 135.6, 135.2, 133.7, 130.5,

130.4, 129.5 (2C), 129.3 (2C), 128.8 (4C), 128.2 (2C), 128.1 (2C), 128.0, 123.1, 123.0, 79.8, 78.9, 50.6; HRMS (ESI-TOF) calcd for C<sub>30</sub>H<sub>22</sub><sup>35</sup>ClN<sub>2</sub>O<sub>2</sub> [M + H]<sup>+</sup> 477.1370, found 477.1369.

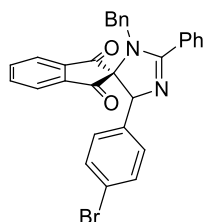

**3-Benzyl-5-(4-bromophenyl)-2-phenyl-3,5-dihydrospiro[imidazole-4,2'-indene]-1',3'-dione (3ea).** General procedure was followed to afford **3ea** as a yellow solid (89.8 mg, 86% yield); <sup>1</sup>H NMR (400 MHz, CDCl<sub>3</sub>) δ 7.86–7.79 (m, 2H), 7.74–7.71 (m, 1H), 7.69 (td, *J* = 6.9, 1.2 Hz, 1H), 7.66 (td, *J* = 6.9, 1.8 Hz, 1H), 7.53–7.45 (m, 4H), 7.21 (d, *J* = 8.4 Hz, 2H), 7.03–6.95 (m, 5H), 6.86 (d, *J* = 8.4 Hz, 2H), 5.55 (s, 1H), 4.57 (d, *J* = 14.8 Hz, 1H), 4.11 (d, *J* = 14.8 Hz, 1H); <sup>13</sup>C NMR (101 MHz, CDCl<sub>3</sub>) δ 199.2, 195.9, 167.6, 141.1, 140.8, 136.3, 136.1, 135.8, 135.2, 131.1 (2C), 130.5, 130.3, 129.6 (2C), 129.5 (2C), 128.8 (4C), 128.1 (2C), 128.0, 123.08, 123.06, 122.0, 79.7, 78.9, 50.6; HRMS (ESI-TOF) calcd for C<sub>30</sub>H<sub>22</sub><sup>79</sup>BrN<sub>2</sub>O<sub>2</sub> [M + H]<sup>+</sup> 521.0865, found 521.0861.

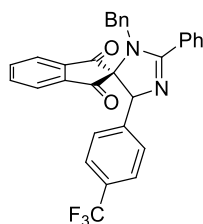

**3-Benzyl-2-phenyl-5-(4-(trifluoromethyl)phenyl)-3,5-dihydrospiro[imidazole-4,2'-indene]-1',3'-dione (3fa).** General procedure was followed to afford **3fa** as a yellow solid (87.6 mg, 86% yield); <sup>1</sup>H NMR (400 MHz, CDCl<sub>3</sub>) δ 7.87–7.81 (m, 2H), 7.74 (d, *J* = 7.2 Hz, 1H), 7.70 (td, *J* = 7.2, 1.0 Hz, 1H), 7.65 (td, *J* = 7.2, 1.4 Hz, 1H), 7.55–7.47 (m, 3H), 7.43 (d, *J* = 7.4 Hz, 1H), 7.35 (d, *J* = 8.1 Hz, 2H), 7.11 (d, *J* = 8.1 Hz, 2H), 7.04–6.95 (m, 5H), 5.64 (s, 1H), 4.58 (d, *J* = 14.8 Hz, 1H), 4.12 (d, *J* = 14.8 Hz, 1H); <sup>13</sup>C NMR (101 MHz, CDCl<sub>3</sub>) δ 199.1, 195.8, 167.9, 141.2, 141.1, 140.7, 136.4, 135.9, 135.1, 130.6, 130.3, 130.0 (q, *J* = 32.3 Hz), 129.5 (2C), 128.83 (2C), 128.79 (2C), 128.3 (2C), 128.13 (2C), 128.07, 124.9 (q, *J* = 3.6 Hz, 2C), 124.1 (q, *J* = 272.2 Hz), 123.1, 123.0, 79.6, 78.8, 50.6; <sup>19</sup>F NMR (376 MHz, CDCl<sub>3</sub>) δ -62.53 (s, 3F); HRMS (ESI-TOF) calcd for C<sub>31</sub>H<sub>22</sub>F<sub>3</sub>N<sub>2</sub>O<sub>2</sub> [M + H]<sup>+</sup> 511.1633, found 511.1635.

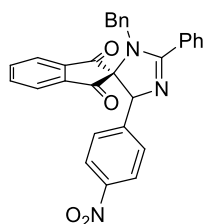

**3-Benzyl-5-(4-nitrophenyl)-2-phenyl-3,5-dihydrospiro[imidazole-4,2'-indene]-1',3'-dione (3ga).** General procedure was followed to afford **3ga** as a yellow solid (83.7 mg, 86% yield); <sup>1</sup>H NMR (400 MHz, CDCl<sub>3</sub>) δ 7.97 (d, *J* = 8.7 Hz, 2H), 7.88–7.81 (m, 2H), 7.77–7.73 (m, 1H), 7.73

(td,  $J = 7.5, 1.0$  Hz, 1H), 7.67 (td,  $J = 7.0, 1.9$  Hz, 1H), 7.57–7.49 (m, 3H), 7.44 (d,  $J = 7.4$  Hz, 1H), 7.18 (d,  $J = 8.7$  Hz, 2H), 7.03–6.94 (m, 5H), 5.68 (s, 1H), 4.58 (d,  $J = 14.7$  Hz, 1H), 4.13 (d,  $J = 14.7$  Hz, 1H);  $^{13}\text{C}$  NMR (101 MHz,  $\text{CDCl}_3$ )  $\delta$  198.8, 195.7, 168.1, 147.5, 144.7, 141.0, 140.6, 136.6, 136.1, 134.8, 130.8, 130.0, 129.5 (2C), 128.90 (2C), 128.85 (2C), 128.76 (2C), 128.17, 128.15 (2C), 123.3, 123.2 (2C), 123.1, 79.1, 78.3, 50.6; HRMS (ESI-TOF) calcd for  $\text{C}_{30}\text{H}_{22}\text{N}_3\text{O}_4$   $[\text{M} + \text{H}]^+$  488.1610, found 488.1612.

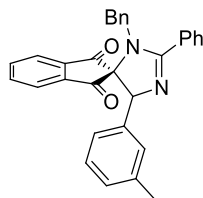

**3-Benzyl-2-phenyl-5-*m*-tolyl-3,5-dihydrospiro[imidazole-4,2'-indene]-1',3'-dione (3ha).**

General procedure was followed to afford **3ha** as a yellow solid (76.6 mg, 84% yield);  $^1\text{H}$  NMR (400 MHz,  $\text{CDCl}_3$ )  $\delta$  7.88–7.81 (m, 2H), 7.74 (d,  $J = 7.5$  Hz, 1H), 7.67 (td,  $J = 7.4, 1.0$  Hz, 1H), 7.62 (td,  $J = 7.4, 1.2$  Hz, 1H), 7.53–7.45 (m, 3H), 7.41 (d,  $J = 7.4$  Hz, 1H), 7.07–6.96 (m, 5H), 6.94 (t,  $J = 7.4$  Hz, 1H), 6.89 (d,  $J = 7.6$  Hz, 1H), 6.78 (s, 1H), 6.70 (d,  $J = 7.3$  Hz, 1H), 5.57 (s, 1H), 4.58 (d,  $J = 14.8$  Hz, 1H), 4.12 (d,  $J = 14.8$  Hz, 1H), 2.12 (s, 3H);  $^{13}\text{C}$  NMR (101 MHz,  $\text{CDCl}_3$ )  $\delta$  199.5, 196.0, 167.2, 141.2, 141.0, 137.5, 136.8, 136.0, 135.5, 135.4, 130.6, 130.4, 129.4 (2C), 128.9 (2C), 128.7 (2C), 128.6, 128.5, 128.1 (2C), 127.9, 127.7, 124.9, 123.0, 122.8, 80.4, 79.8, 50.6, 21.3; HRMS (ESI-TOF) calcd for  $\text{C}_{31}\text{H}_{25}\text{N}_2\text{O}_2$   $[\text{M} + \text{H}]^+$  457.1916, found 457.1919.

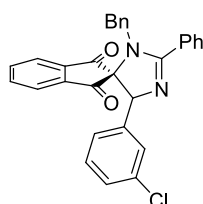

**3-Benzyl-5-(3-chlorophenyl)-2-phenyl-3,5-dihydrospiro[imidazole-4,2'-indene]-1',3'-dione (3ia).**

General procedure was followed to afford **3ia** as a yellow solid (85.4 mg, 90% yield);  $^1\text{H}$  NMR (400 MHz,  $\text{CDCl}_3$ )  $\delta$  7.87–7.81 (m, 2H), 7.76–7.73 (m, 1H), 7.70 (td,  $J = 7.1, 1.2$  Hz, 1H), 7.66 (td,  $J = 7.1, 1.5$  Hz, 1H), 7.54–7.48 (m, 3H), 7.48–7.44 (m, 1H), 7.09 (ddd,  $J = 7.9, 1.9, 1.1$  Hz, 1H), 7.04–6.95 (m, 7H), 6.82 (d,  $J = 7.6$  Hz, 1H), 5.56 (s, 1H), 4.58 (d,  $J = 14.8$  Hz, 1H), 4.12 (d,  $J = 14.8$  Hz, 1H);  $^{13}\text{C}$  NMR (101 MHz,  $\text{CDCl}_3$ )  $\delta$  199.1, 195.7, 167.7, 141.0, 140.8, 139.1, 136.3, 135.8, 135.2, 134.1, 130.6, 130.3, 129.5 (2C), 129.2, 128.82 (2C), 128.80 (2C), 128.2, 128.12 (2C), 128.08, 128.02, 126.0, 123.1, 123.0, 79.8, 78.8, 50.6; HRMS (ESI-TOF) calcd for  $\text{C}_{30}\text{H}_{22}^{35}\text{ClN}_2\text{O}_2$   $[\text{M} + \text{H}]^+$  477.1370, found 477.1377.

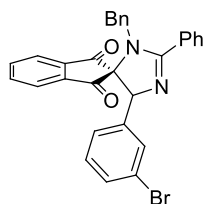

**3-Benzyl-5-(3-bromophenyl)-2-phenyl-3,5-dihydrospiro[imidazole-4,2'-indene]-1',3'-dione (3ja).**

General procedure was followed to afford **3ja** as a yellow solid (97.3 mg, 93% yield);  $^1\text{H}$

NMR (400 MHz, CDCl<sub>3</sub>)  $\delta$  7.87–7.80 (m, 2H), 7.75 (d,  $J$  = 7.0 Hz, 1H), 7.70 (td,  $J$  = 7.1, 0.9 Hz, 1H), 7.66 (td,  $J$  = 7.1, 1.3 Hz, 1H), 7.54–7.48 (m, 3H), 7.46 (d,  $J$  = 7.1 Hz, 1H), 7.24 (d,  $J$  = 7.8 Hz, 1H), 7.10 (s, 1H), 7.05–6.97 (m, 5H), 6.95 (t,  $J$  = 7.8 Hz, 1H), 6.88 (d,  $J$  = 7.7 Hz, 1H), 5.54 (s, 1H), 4.58 (d,  $J$  = 14.8 Hz, 1H), 4.12 (d,  $J$  = 14.8 Hz, 1H); <sup>13</sup>C NMR (101 MHz, CDCl<sub>3</sub>)  $\delta$  199.1, 195.7, 167.7, 141.0, 140.8, 139.4, 136.3, 135.8, 135.2, 131.05, 130.99, 130.6, 130.3, 129.5 (3C), 128.83 (2C), 128.80 (2C), 128.1 (2C), 128.0, 126.5, 123.2, 123.0, 122.2, 79.8, 78.8, 50.6; HRMS (ESI-TOF) calcd for C<sub>30</sub>H<sub>22</sub><sup>79</sup>BrN<sub>2</sub>O<sub>2</sub> [M + H]<sup>+</sup> 521.0865, found 521.0867.

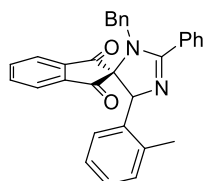

**3-Benzyl-2-phenyl-5-o-tolyl-3,5-dihydrospiro[imidazole-4,2'-indene]-1',3'-dione (3ka).**

General procedure was followed to afford **3ka** as a yellow solid (79.5 mg, 87% yield); <sup>1</sup>H NMR (400 MHz, CDCl<sub>3</sub>)  $\delta$  7.88–7.81 (m, 2H), 7.73–7.68 (m, 1H), 7.65 (td,  $J$  = 7.2, 1.2 Hz, 1H), 7.60 (td,  $J$  = 7.2, 1.3 Hz, 1H), 7.52–7.46 (m, 3H), 7.45 (dd,  $J$  = 7.7, 0.8 Hz, 1H), 7.43–7.38 (m, 1H), 7.19 (t,  $J$  = 7.5 Hz, 1H), 7.07–6.95 (m, 6H), 6.74 (d,  $J$  = 7.5 Hz, 1H), 5.86 (s, 1H), 4.59 (d,  $J$  = 14.9 Hz, 1H), 4.15 (d,  $J$  = 14.9 Hz, 1H), 1.67 (s, 3H); <sup>13</sup>C NMR (101 MHz, CDCl<sub>3</sub>)  $\delta$  199.7, 195.9, 167.0, 141.3, 140.2, 136.2, 135.5 (2C), 135.0, 134.9, 130.6, 130.4, 130.2, 129.7, 129.4 (2C), 128.8 (2C), 128.7 (2C), 128.1 (2C), 127.9, 127.7, 126.1, 122.8, 122.6, 79.8, 76.0, 50.5, 19.2; HRMS (ESI-TOF) calcd for C<sub>31</sub>H<sub>25</sub>N<sub>2</sub>O<sub>2</sub> [M + H]<sup>+</sup> 457.1916, found 457.1914.

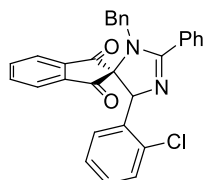

**3-Benzyl-5-(2-chlorophenyl)-2-phenyl-3,5-dihydrospiro[imidazole-4,2'-indene]-1',3'-dione (3la).**

General procedure was followed to afford **3la** as a yellow solid (85.2 mg, 89% yield); <sup>1</sup>H NMR (400 MHz, CDCl<sub>3</sub>)  $\delta$  7.88–7.81 (m, 2H), 7.72 (d,  $J$  = 7.4 Hz, 1H), 7.66 (td,  $J$  = 7.4, 1.1 Hz, 1H), 7.64–7.58 (m, 2H), 7.53–7.46 (m, 3H), 7.41 (d,  $J$  = 7.5 Hz, 1H), 7.30 (td,  $J$  = 7.6, 0.9 Hz, 1H), 7.09 (td,  $J$  = 7.6, 1.6 Hz, 1H), 7.04–6.93 (m, 6H), 6.07 (s, 1H), 4.54 (d,  $J$  = 15.0 Hz, 1H), 4.16 (d,  $J$  = 15.0 Hz, 1H); <sup>13</sup>C NMR (101 MHz, CDCl<sub>3</sub>)  $\delta$  199.1, 196.0, 167.5, 142.1, 140.1, 135.8, 135.7, 135.24, 135.23, 132.8, 131.6, 130.5, 130.4, 129.4 (2C), 129.1, 128.84 (2C), 128.78 (2C), 128.5, 128.0 (2C), 127.9, 127.0, 122.9, 122.6, 78.3, 75.1, 50.4; HRMS (ESI-TOF) calcd for C<sub>30</sub>H<sub>22</sub><sup>35</sup>ClN<sub>2</sub>O<sub>2</sub> [M + H]<sup>+</sup> 477.1370, found 477.1376.

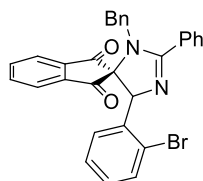

**3-Benzyl-5-(2-bromophenyl)-2-phenyl-3,5-dihydrospiro[imidazole-4,2'-indene]-1',3'-dione**

**(3ma)**. General procedure was followed to afford **3ma** as a yellow solid (93.4 mg, 90% yield);  $^1\text{H}$  NMR (400 MHz,  $\text{CDCl}_3$ )  $\delta$  7.88–7.81 (m, 2H), 7.74 (d,  $J = 7.4$  Hz, 1H), 7.66 (td,  $J = 7.4, 1.1$  Hz, 1H), 7.61 (td,  $J = 7.4, 1.2$  Hz, 1H), 7.59 (dd,  $J = 7.8, 1.7$  Hz, 1H), 7.53–7.46 (m, 3H), 7.41 (d,  $J = 7.4$  Hz, 1H), 7.35 (td,  $J = 7.6, 1.0$  Hz, 1H), 7.16 (dd,  $J = 8.0, 1.1$  Hz, 1H), 7.05–6.93 (m, 6H), 6.07 (s, 1H), 4.54 (d,  $J = 15.0$  Hz, 1H), 4.18 (d,  $J = 15.0$  Hz, 1H);  $^{13}\text{C}$  NMR (101 MHz,  $\text{CDCl}_3$ )  $\delta$  199.1, 195.9, 167.5, 142.3, 140.2, 136.8, 135.8, 135.7, 135.2, 132.0, 131.9, 130.5, 130.4, 129.44, 129.38 (2C), 128.84 (2C), 128.78 (2C), 128.0 (2C), 127.9, 127.5, 123.4, 123.0, 122.7, 78.2, 77.3, 50.4; HRMS (ESI-TOF) calcd for  $\text{C}_{30}\text{H}_{22}^{79}\text{BrN}_2\text{O}_2$   $[\text{M} + \text{H}]^+$  521.0865, found 521.0869.

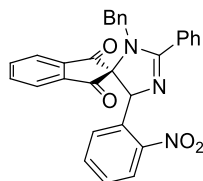

**3-Benzyl-5-(2-nitrophenyl)-2-phenyl-3,5-dihydrospiro[imidazole-4,2'-indene]-1',3'-dione**

**(3na)**. General procedure was followed to afford **3na** as a yellow solid (88.9 mg, 91% yield);  $^1\text{H}$  NMR (400 MHz,  $\text{CDCl}_3$ )  $\delta$  7.89 (dd,  $J = 8.0, 1.3$  Hz, 1H), 7.88–7.83 (m, 2H), 7.82–7.75 (m, 2H), 7.72 (td,  $J = 7.7, 1.2$  Hz, 1H), 7.67 (td,  $J = 7.5, 0.9$  Hz, 1H), 7.56 (td,  $J = 7.5, 1.0$  Hz, 1H), 7.54–7.47 (m, 3H), 7.43–7.34 (m, 2H), 6.98–6.89 (m, 5H), 6.15 (s, 1H), 4.46 (d,  $J = 15.3$  Hz, 1H), 4.25 (d,  $J = 15.3$  Hz, 1H);  $^{13}\text{C}$  NMR (101 MHz,  $\text{CDCl}_3$ )  $\delta$  199.6, 196.0, 167.6, 147.1, 142.0, 140.5, 135.9, 135.5, 135.0, 134.1, 133.6, 132.7, 130.8, 130.1, 129.2 (2C), 128.9 (3C), 128.8 (2C), 128.1 (2C), 128.0, 124.2, 123.1, 122.7, 76.3, 73.4, 50.3; HRMS (ESI-TOF) calcd for  $\text{C}_{30}\text{H}_{22}\text{N}_3\text{O}_4$   $[\text{M} + \text{H}]^+$  488.1610, found 488.1619.

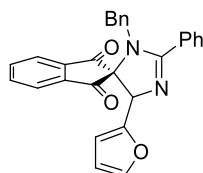

**3-Benzyl-5-(furan-2-yl)-2-phenyl-3,5-dihydrospiro[imidazole-4,2'-indene]-1',3'-dione (3oa)**

General procedure was followed to afford **3oa** as a yellow solid (67.6 mg, 78% yield);  $^1\text{H}$  NMR (400 MHz,  $\text{CDCl}_3$ )  $\delta$  7.83–7.77 (m, 2H), 7.77–7.68 (m, 3H), 7.66–7.60 (m, 1H), 7.52–7.44 (m, 3H), 7.05–6.94 (m, 6H), 6.30 (d,  $J = 3.2$  Hz, 1H), 6.22 (dd,  $J = 3.2, 1.8$  Hz, 1H), 5.61 (s, 1H), 4.53 (d,  $J = 14.9$  Hz, 1H), 4.15 (d,  $J = 14.9$  Hz, 1H);  $^{13}\text{C}$  NMR (101 MHz,  $\text{CDCl}_3$ )  $\delta$  198.8, 195.4, 167.7, 151.1, 142.1, 141.0, 140.9, 136.1, 135.6, 135.2, 130.5, 130.3, 129.4 (2C), 128.9 (2C), 128.7 (2C), 128.1 (2C), 128.0, 123.3, 122.8, 110.6, 108.9, 77.9, 73.4, 50.4; HRMS (ESI-TOF) calcd for  $\text{C}_{28}\text{H}_{21}\text{N}_2\text{O}_3$   $[\text{M} + \text{H}]^+$  433.1552, found 433.1558.

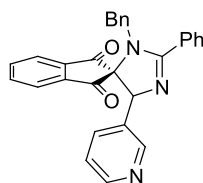

**3-Benzyl-2-phenyl-5-(pyridin-3-yl)-3,5-dihydrospiro[imidazole-4,2'-indene]-1',3'-dione (3pa)**

General procedure was followed to afford **3pa** as a yellow oil (79.2 mg, 89% yield);  $^1\text{H NMR}$  (400 MHz,  $\text{CDCl}_3$ )  $\delta$  8.36 (d,  $J = 4.4$  Hz, 1H), 8.00 (s, 1H), 7.87–7.80 (m, 2H), 7.74 (d,  $J = 7.4$  Hz, 1H), 7.70 (t,  $J = 7.3$  Hz, 1H), 7.64 (t,  $J = 7.2$  Hz, 1H), 7.59 (d,  $J = 7.8$  Hz, 1H), 7.55–7.47 (m, 3H), 7.43 (d,  $J = 7.4$  Hz, 1H), 7.16 (dd,  $J = 7.7, 4.9$  Hz, 1H), 7.05–6.93 (m, 5H), 5.60 (s, 1H), 4.58 (d,  $J = 14.8$  Hz, 1H), 4.14 (d,  $J = 14.8$  Hz, 1H);  $^{13}\text{C NMR}$  (101 MHz,  $\text{CDCl}_3$ )  $\delta$  198.8, 195.9, 168.0, 149.3, 148.8, 141.0, 140.6, 136.5, 136.14, 136.05, 135.0, 132.9, 130.6, 130.2, 129.5 (2C), 128.83 (2C), 128.76 (2C), 128.12 (2C), 128.08, 123.3, 123.2, 123.0, 79.4, 76.8, 50.6; HRMS (ESI-TOF) calcd for  $\text{C}_{29}\text{H}_{22}\text{N}_3\text{O}_2$   $[\text{M} + \text{H}]^+$  444.1712, found 444.1714.

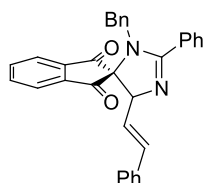

**(E)-3-Benzyl-2-phenyl-5-styryl-3,5-dihydrospiro[imidazole-4,2'-indene]-1',3'-dione (3qa).**

General procedure by extending the reaction time to 30 min was followed to afford **3qa** as a yellow solid (68.5 mg, 73% yield);  $^1\text{H NMR}$  (400 MHz,  $\text{CDCl}_3$ )  $\delta$  7.83–7.76 (m, 2H), 7.76–7.65 (m, 4H), 7.51–7.43 (m, 3H), 7.24–7.12 (m, 5H), 7.08–6.95 (m, 5H), 6.32 (d,  $J = 15.8$  Hz, 1H), 6.11 (dd,  $J = 15.8, 8.6$  Hz, 1H), 5.06 (d,  $J = 8.6$  Hz, 1H), 4.51 (d,  $J = 14.8$  Hz, 1H), 4.23 (d,  $J = 14.8$  Hz, 1H);  $^{13}\text{C NMR}$  (101 MHz,  $\text{CDCl}_3$ )  $\delta$  199.0, 196.3, 166.7, 141.02, 140.99, 136.3, 136.2, 135.8, 135.3, 133.9, 130.42, 130.38, 129.5 (2C), 128.8 (2C), 128.7 (2C), 128.4 (2C), 128.1 (2C), 128.0, 127.9, 126.7 (2C), 125.8, 123.2 (2C), 78.7, 77.9, 50.4; HRMS (ESI-TOF) calcd for  $\text{C}_{32}\text{H}_{25}\text{N}_2\text{O}_2$   $[\text{M} + \text{H}]^+$  469.1916, found 469.1916.

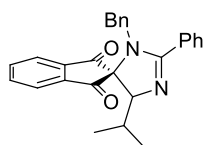

**3-Benzyl-5-isopropyl-2-phenyl-3,5-dihydrospiro[imidazole-4,2'-indene]-1',3'-dione (3ra).**

General procedure was followed to afford **3ra** as a yellow solid (74.2 mg, 91% yield);  $^1\text{H NMR}$  (400 MHz,  $\text{CDCl}_3$ )  $\delta$  7.84 (d,  $J = 7.5$  Hz, 1H), 7.76 (td,  $J = 7.3, 0.9$  Hz, 1H), 7.73–7.66 (m, 3H), 7.64 (d,  $J = 7.5$  Hz, 1H), 7.46–7.39 (m, 3H), 7.01–6.89 (m, 5H), 4.42 (d,  $J = 15.2$  Hz, 1H), 4.21 (d,  $J = 8.5$  Hz, 1H), 4.00 (d,  $J = 15.2$  Hz, 1H), 2.01–1.88 (m, 1H), 1.16 (d,  $J = 6.6$  Hz, 3H), 0.52 (d,  $J = 6.6$  Hz, 3H);  $^{13}\text{C NMR}$  (101 MHz,  $\text{CDCl}_3$ )  $\delta$  200.2, 197.5, 164.7, 141.5, 140.6, 136.0, 135.9, 135.6, 130.6, 130.1, 129.1 (2C), 128.7 (2C), 128.6 (2C), 127.9 (2C), 127.7, 123.3, 122.6, 83.0, 76.8, 50.2, 30.6, 21.3, 20.3; HRMS (ESI-TOF) calcd for  $\text{C}_{27}\text{H}_{25}\text{N}_2\text{O}_2$   $[\text{M} + \text{H}]^+$  409.1916, found 409.1922.

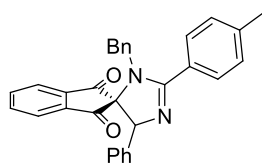

**3-Benzyl-5-phenyl-2-p-tolyl-3,5-dihydrospiro[imidazole-4,2'-indene]-1',3'-dione (3ab).**

General procedure was followed to afford **3ab** as a yellow solid (76.2 mg, 83% yield);  $^1\text{H NMR}$  (400 MHz,  $\text{CDCl}_3$ )  $\delta$  7.73 (d,  $J = 8.0$  Hz, 2H), 7.72 (d,  $J = 7.3$  Hz, 1H), 7.66 (t,  $J = 7.3$  Hz, 1H),



7.60 (t,  $J = 7.4$  Hz, 1H), 7.39 (d,  $J = 7.5$  Hz, 1H), 7.29 (d,  $J = 8.0$  Hz, 2H), 7.12–6.93 (m, 10H), 5.58 (s, 1H), 4.61 (d,  $J = 14.9$  Hz, 1H), 4.12 (d,  $J = 14.9$  Hz, 1H), 2.42 (s, 3H);  $^{13}\text{C}$  NMR (101 MHz,  $\text{CDCl}_3$ )  $\delta$  199.5, 196.1, 167.4, 141.1, 140.9, 140.5, 137.0, 136.1, 135.6, 135.5, 129.41 (2C), 129.38 (2C), 128.8 (2C), 128.1 (2C), 128.0 (2C), 127.92 (2C), 127.87, 127.81, 127.6, 123.0, 122.8, 80.2, 79.8, 50.6, 21.6; HRMS (ESI-TOF) calcd for  $\text{C}_{31}\text{H}_{25}\text{N}_2\text{O}_2$   $[\text{M} + \text{H}]^+$  457.1916, found 457.1915.

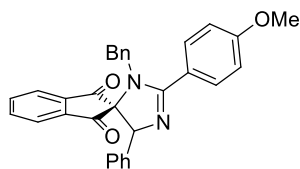

**3-Benzyl-2-(4-methoxyphenyl)-5-phenyl-3,5-dihydrospiro[imidazole-4,2'-indene]-1',3'-dione**

**(3ac).** General procedure was followed to afford **3ac** as a yellow solid (70.9 mg, 75% yield);  $^1\text{H}$  NMR (400 MHz,  $\text{CDCl}_3$ )  $\delta$  7.79 (d,  $J = 8.8$  Hz, 2H), 7.74 (d,  $J = 7.5$  Hz, 1H), 7.67 (td,  $J = 7.4$ , 1.1 Hz, 1H), 7.61 (td,  $J = 7.4$ , 1.2 Hz, 1H), 7.39 (d,  $J = 7.5$  Hz, 1H), 7.12–7.03 (m, 5H), 7.03–6.93 (m, 7H), 5.58 (s, 1H), 4.63 (d,  $J = 15.0$  Hz, 1H), 4.15 (d,  $J = 15.0$  Hz, 1H), 3.86 (s, 3H);  $^{13}\text{C}$  NMR (101 MHz,  $\text{CDCl}_3$ )  $\delta$  199.5, 196.2, 167.2, 161.3, 141.1, 141.0, 137.1, 136.1, 135.7, 135.5, 130.4 (2C), 129.3 (2C), 128.1 (2C), 127.99 (2C), 127.95 (2C), 127.88, 127.85, 123.0, 122.9, 122.7, 114.1 (2C), 80.3, 79.7, 55.5, 50.7; HRMS (ESI-TOF) calcd for  $\text{C}_{31}\text{H}_{25}\text{N}_2\text{O}_3$   $[\text{M} + \text{H}]^+$  473.1865, found 473.1865.

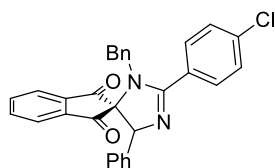

**3-Benzyl-2-(4-chlorophenyl)-5-phenyl-3,5-dihydrospiro[imidazole-4,2'-indene]-1',3'-dione**

**(3ad).** General procedure was followed to afford **3ad** as a yellow solid (85.9 mg, 90% yield);  $^1\text{H}$  NMR (400 MHz,  $\text{CDCl}_3$ )  $\delta$  7.77 (d,  $J = 8.5$  Hz, 2H), 7.74 (d,  $J = 7.8$  Hz, 1H), 7.68 (td,  $J = 7.4$ , 1.1 Hz, 1H), 7.62 (td,  $J = 7.4$ , 1.3 Hz, 1H), 7.46 (d,  $J = 8.5$  Hz, 2H), 7.40 (d,  $J = 7.4$  Hz, 1H), 7.13–6.98 (m, 8H), 6.97–6.91 (m, 2H), 5.58 (s, 1H), 4.55 (d,  $J = 14.9$  Hz, 1H), 4.10 (d,  $J = 14.9$  Hz, 1H);  $^{13}\text{C}$  NMR (101 MHz,  $\text{CDCl}_3$ )  $\delta$  199.2, 195.9, 166.4, 141.1, 140.9, 136.6, 136.5, 136.2, 135.6, 135.3, 130.2 (2C), 129.3 (2C), 129.03 (2C), 128.99, 128.2 (2C), 128.00 (3C), 127.95, 127.91 (2C), 123.1, 122.9, 80.5, 79.7, 50.6; HRMS (ESI-TOF) calcd for  $\text{C}_{30}\text{H}_{22}^{35}\text{ClN}_2\text{O}_2$   $[\text{M} + \text{H}]^+$  477.1370, found 477.1371.

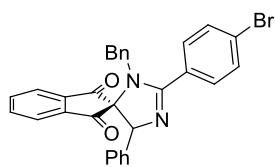

**3-Benzyl-2-(4-bromophenyl)-5-phenyl-3,5-dihydrospiro[imidazole-4,2'-indene]-1',3'-dione**

**(3ae).** General procedure was followed to afford **3ae** as a yellow solid (91.7 mg, 88% yield);  $^1\text{H}$  NMR (400 MHz,  $\text{CDCl}_3$ )  $\delta$  7.74 (d,  $J = 7.4$  Hz, 1H), 7.70 (d,  $J = 8.5$  Hz, 2H), 7.68 (td,  $J = 7.5$ , 1.1 Hz, 1H), 7.619 (d,  $J = 8.5$  Hz, 2H), 7.616 (td,  $J = 7.5$ , 1.3 Hz, 1H), 7.40 (d,  $J = 7.5$  Hz, 1H), 7.13–6.97 (m, 8H), 6.97–6.91 (m, 2H), 5.58 (s, 1H), 4.54 (d,  $J = 14.9$  Hz, 1H), 4.10 (d,  $J = 14.9$  Hz, 1H);  $^{13}\text{C}$  NMR (101 MHz,  $\text{CDCl}_3$ )  $\delta$  199.2, 195.9, 166.5, 141.1, 140.9, 136.6, 136.2, 135.6, 135.3, 132.0 (2C), 130.4 (2C), 129.5, 129.3 (2C), 128.2 (2C), 128.01, 127.99 (2C), 127.95, 127.90 (2C), 124.8,

123.0, 122.9, 80.4, 79.7, 50.6; HRMS (ESI-TOF) calcd for C<sub>30</sub>H<sub>22</sub><sup>79</sup>BrN<sub>2</sub>O<sub>2</sub> [M + H]<sup>+</sup> 521.0865, found 521.0863.

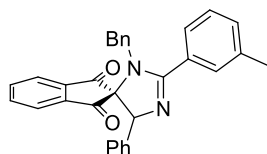

**3-Benzyl-5-phenyl-2-m-tolyl-3,5-dihydrospiro[imidazole-4,2'-indene]-1',3'-dione (3af).**

General procedure was followed to afford **3af** as a yellow solid (75.3 mg, 82% yield); <sup>1</sup>H NMR (400 MHz, CDCl<sub>3</sub>) δ 7.73 (d, *J* = 7.4 Hz, 1H), 7.69–7.64 (m, 2H), 7.64–7.57 (m, 2H), 7.40 (d, *J* = 7.7 Hz, 1H), 7.36 (t, *J* = 7.6 Hz, 1H), 7.30 (d, *J* = 7.5 Hz, 1H), 7.12–6.93 (m, 10H), 5.59 (s, 1H), 4.59 (d, *J* = 14.8 Hz, 1H), 4.11 (d, *J* = 14.8 Hz, 1H), 2.42 (s, 3H); <sup>13</sup>C NMR (101 MHz, CDCl<sub>3</sub>) δ 199.4, 196.0, 167.6, 141.1, 140.9, 138.6, 136.9, 136.1, 135.6, 135.5, 131.1, 130.4, 129.6, 129.4 (2C), 128.5, 128.1 (2C), 127.93 (2C), 127.91 (2C), 127.87, 127.81, 125.7, 123.0, 122.8, 80.3, 79.7, 50.6, 21.5; HRMS (ESI-TOF) calcd for C<sub>31</sub>H<sub>25</sub>N<sub>2</sub>O<sub>2</sub> [M + H]<sup>+</sup> 457.1916, found 457.1913.

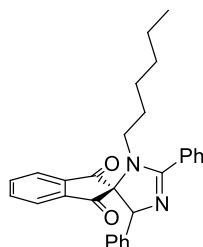

**3-Hexyl-2,5-diphenyl-3,5-dihydrospiro[imidazole-4,2'-indene]-1',3'-dione (3ag).**

General procedure was followed to afford **3ag** as a yellow oil (69.8 mg, 80% yield); <sup>1</sup>H NMR (400 MHz, CDCl<sub>3</sub>) δ 8.06 (d, *J* = 7.6 Hz, 1H), 7.85 (td, *J* = 7.5, 0.7 Hz, 1H), 7.79–7.73 (m, 2H), 7.74 (t, *J* = 7.4 Hz, 1H), 7.54–7.47 (m, 4H), 7.13–7.04 (m, 3H), 6.99–6.92 (m, 2H), 5.56 (s, 1H), 3.29 (ddd, *J* = 14.5, 9.4, 6.3 Hz, 1H), 2.96 (ddd, *J* = 14.5, 9.8, 4.8 Hz, 1H), 1.31–0.97 (m, 8H), 0.75 (t, *J* = 7.2 Hz, 3H); <sup>13</sup>C NMR (101 MHz, CDCl<sub>3</sub>) δ 199.9, 196.3, 167.7, 141.1, 140.9, 136.9, 136.5, 136.0, 130.8, 130.2, 128.7 (2C), 128.5 (2C), 128.0 (2C), 127.9 (2C), 127.8, 123.5, 123.2, 81.5, 80.3, 46.1, 31.1, 30.2, 26.3, 22.4, 13.9; HRMS (ESI-TOF) calcd for C<sub>29</sub>H<sub>29</sub>N<sub>2</sub>O<sub>2</sub> [M + H]<sup>+</sup> 437.2229, found 437.2230.

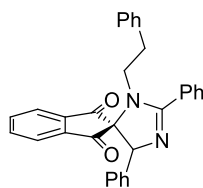

**3-Phenethyl-2,5-diphenyl-3,5-dihydrospiro[imidazole-4,2'-indene]-1',3'-dione (3ah).**

General procedure was followed to afford **3ah** as a yellow solid (78.5 mg, 86% yield); <sup>1</sup>H NMR (400 MHz, CDCl<sub>3</sub>) δ 8.06 (d, *J* = 7.6 Hz, 1H), 7.85 (td, *J* = 7.5, 0.9 Hz, 1H), 7.74 (td, *J* = 7.5, 0.9 Hz, 1H), 7.67–7.61 (m, 2H), 7.51 (d, *J* = 7.7 Hz, 1H), 7.49–7.42 (m, 3H), 7.16–7.05 (m, 6H), 6.98–6.93 (m, 2H), 6.93–6.88 (m, 2H), 5.57 (s, 1H), 3.53 (ddd, *J* = 14.8, 9.9, 6.5 Hz, 1H), 3.21 (ddd, *J* = 14.8, 9.7, 5.7 Hz, 1H), 2.63 (ddd, *J* = 13.6, 9.7, 6.5 Hz, 1H), 2.53 (ddd, *J* = 13.6, 9.9, 5.7 Hz, 1H); <sup>13</sup>C NMR (101 MHz, CDCl<sub>3</sub>) δ 199.8, 196.5, 167.6, 141.3, 141.0, 138.1, 136.8, 136.6, 136.0, 130.6, 130.3, 128.8 (2C), 128.7 (2C), 128.6 (2C), 128.5 (2C), 128.1 (2C), 128.0 (3C), 126.5, 123.6, 123.3, 82.1, 80.5, 47.7, 36.8; HRMS (ESI-TOF) calcd for C<sub>31</sub>H<sub>25</sub>N<sub>2</sub>O<sub>2</sub> [M + H]<sup>+</sup> 457.1916, found 457.1920.

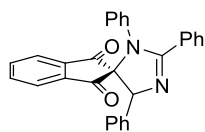

**2,3,5-Triphenyl-3,5-dihydrospiro[imidazole-4,2'-indene]-1',3'-dione (3ai).** General procedure was followed to afford **3ai** as a yellow solid (76.9 mg, 90% yield);  $^1\text{H}$  NMR (400 MHz,  $\text{CDCl}_3$ )  $\delta$  8.01 (d,  $J = 7.6$  Hz, 1H), 7.80 (t,  $J = 7.5$  Hz, 1H), 7.69 (t,  $J = 7.5$  Hz, 1H), 7.62 (d,  $J = 8.0$  Hz, 2H), 7.46 (d,  $J = 7.6$  Hz, 1H), 7.37 (t,  $J = 7.4$  Hz, 1H), 7.29 (t,  $J = 7.2$  Hz, 2H), 7.17–6.97 (m, 8H), 6.95 (d,  $J = 7.8$  Hz, 2H), 5.77 (s, 1H);  $^{13}\text{C}$  NMR (101 MHz,  $\text{CDCl}_3$ )  $\delta$  199.0, 195.7, 164.5, 141.8, 141.2, 139.6, 136.6 (2C), 136.0, 130.4, 129.9, 129.4 (2C), 129.0 (2C), 128.2 (4C), 128.1 (3C), 127.3 (2C), 126.5, 123.7, 123.4, 83.5, 80.1; HRMS (ESI-TOF) calcd for  $\text{C}_{29}\text{H}_{21}\text{N}_2\text{O}_2$   $[\text{M} + \text{H}]^+$  429.1603, found 429.1601.

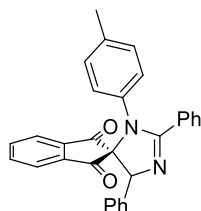

**2,5-Diphenyl-3-*p*-tolyl-3,5-dihydrospiro[imidazole-4,2'-indene]-1',3'-dione (3aj).** General procedure was followed to afford **3aj** as a yellow solid (81.4 mg, 92% yield);  $^1\text{H}$  NMR (400 MHz,  $\text{CDCl}_3$ )  $\delta$  8.00 (d,  $J = 7.7$  Hz, 1H), 7.77 (td,  $J = 7.5, 0.9$  Hz, 1H), 7.66 (td,  $J = 7.5, 0.9$  Hz, 1H), 7.65–7.60 (m, 2H), 7.44 (d,  $J = 7.6$  Hz, 1H), 7.36 (t,  $J = 7.4$  Hz, 1H), 7.27 (t,  $J = 7.4$  Hz, 2H), 7.16–7.08 (m, 3H), 7.06–7.00 (m, 2H), 6.86 (d,  $J = 8.8$  Hz, 2H), 6.84 (d,  $J = 8.8$  Hz, 2H), 5.76 (s, 1H), 2.14 (s, 3H);  $^{13}\text{C}$  NMR (101 MHz,  $\text{CDCl}_3$ )  $\delta$  199.2, 195.8, 164.6, 141.7, 141.2, 137.0, 136.7, 136.5, 136.3, 135.9, 130.2, 129.9, 129.6 (2C), 129.3 (2C), 128.11 (2C), 128.08 (2C), 128.02 (2C), 127.99, 127.3 (2C), 123.6, 123.3, 83.4, 79.9, 21.0; HRMS (ESI-TOF) calcd for  $\text{C}_{30}\text{H}_{23}\text{N}_2\text{O}_2$   $[\text{M} + \text{H}]^+$  443.1760, found 443.1755.

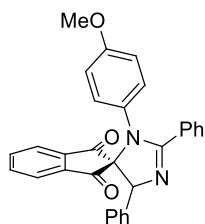

**3-(4-Methoxyphenyl)-2,5-diphenyl-3,5-dihydrospiro[imidazole-4,2'-indene]-1',3'-dione (3ak).** General procedure was followed to afford **3ak** as a yellow solid (82.5 mg, 90% yield);  $^1\text{H}$  NMR (400 MHz,  $\text{CDCl}_3$ )  $\delta$  8.00 (d,  $J = 7.7$  Hz, 1H), 7.78 (td,  $J = 7.5, 0.9$  Hz, 1H), 7.66 (td,  $J = 7.5, 1.0$  Hz, 1H), 7.64–7.59 (m, 2H), 7.44 (d,  $J = 7.6$  Hz, 1H), 7.35 (t,  $J = 7.4$  Hz, 1H), 7.27 (t,  $J = 7.4$  Hz, 2H), 7.14–7.08 (m, 3H), 7.06–7.01 (m, 2H), 6.98 (d,  $J = 9.0$  Hz, 2H), 6.58 (d,  $J = 9.0$  Hz, 2H), 5.75 (s, 1H), 3.63 (s, 3H);  $^{13}\text{C}$  NMR (101 MHz,  $\text{CDCl}_3$ )  $\delta$  199.3, 195.9, 164.8, 158.1, 141.8, 141.3, 136.8, 136.5, 135.9, 132.4, 130.2, 129.8, 129.5 (2C), 129.3 (2C), 128.10 (2C), 128.08 (2C), 128.05 (2C), 127.99, 123.6, 123.3, 114.0 (2C), 83.7, 79.7, 55.3; HRMS (ESI-TOF) calcd for  $\text{C}_{30}\text{H}_{23}\text{N}_2\text{O}_3$   $[\text{M} +$

H]<sup>+</sup> 459.1709, found 459.1711.

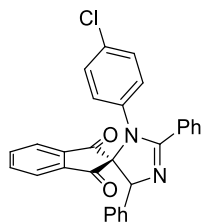

**3-(4-Chlorophenyl)-2,5-diphenyl-3,5-dihydrospiro[imidazole-4,2'-indene]-1',3'-dione (3al).**

General procedure was followed to afford **3al** as a yellow solid (82.4 mg, 89% yield); <sup>1</sup>H NMR (400 MHz, CDCl<sub>3</sub>) δ 8.02 (d, *J* = 7.7 Hz, 1H), 7.81 (td, *J* = 7.5, 0.9 Hz, 1H), 7.70 (td, *J* = 7.5, 0.9 Hz, 1H), 7.64–7.59 (m, 2H), 7.45 (d, *J* = 7.6 Hz, 1H), 7.40 (t, *J* = 7.4 Hz, 1H), 7.31 (t, *J* = 7.4 Hz, 2H), 7.17–7.08 (m, 3H), 7.02 (d, *J* = 8.8 Hz, 2H), 7.03–6.98 (m, 2H), 6.90 (d, *J* = 8.8 Hz, 2H), 5.75 (s, 1H); <sup>13</sup>C NMR (101 MHz, CDCl<sub>3</sub>) δ 198.7, 195.5, 164.2, 141.7, 141.1, 138.3, 136.7, 136.3, 136.1, 132.1, 130.6, 129.5, 129.3 (2C), 129.1 (2C), 128.6 (2C), 128.3 (2C), 128.2, 128.1 (4C), 123.7, 123.5, 83.5, 80.1; HRMS (ESI-TOF) calcd for C<sub>29</sub>H<sub>20</sub><sup>35</sup>ClN<sub>2</sub>O<sub>2</sub> [M + H]<sup>+</sup> 463.1213, found 463.1221.

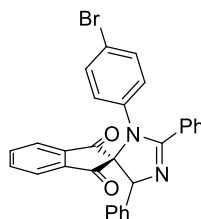

**3-(4-Bromophenyl)-2,5-diphenyl-3,5-dihydrospiro[imidazole-4,2'-indene]-1',3'-dione (3am).**

General procedure was followed to afford **3am** as a yellow solid (95.3 mg, 94% yield); <sup>1</sup>H NMR (400 MHz, CDCl<sub>3</sub>) δ 8.02 (d, *J* = 7.7 Hz, 1H), 7.81 (td, *J* = 7.5, 0.8 Hz, 1H), 7.70 (td, *J* = 7.5, 0.9 Hz, 1H), 7.64–7.59 (m, 2H), 7.46 (d, *J* = 7.6 Hz, 1H), 7.40 (t, *J* = 7.4 Hz, 1H), 7.32 (t, *J* = 7.5 Hz, 2H), 7.17 (d, *J* = 8.7 Hz, 2H), 7.15–7.08 (m, 3H), 7.03–6.98 (m, 2H), 6.82 (d, *J* = 8.7 Hz, 2H), 5.75 (s, 1H); <sup>13</sup>C NMR (101 MHz, CDCl<sub>3</sub>) δ 198.6, 195.5, 164.1, 141.7, 141.1, 138.8, 136.7, 136.3, 136.1, 132.1 (2C), 130.6, 129.5, 129.3 (2C), 128.8 (2C), 128.4 (2C), 128.2, 128.1 (4C), 123.7, 123.5, 120.1, 83.4, 80.1; HRMS (ESI-TOF) calcd for C<sub>29</sub>H<sub>20</sub><sup>79</sup>BrN<sub>2</sub>O<sub>2</sub> [M + H]<sup>+</sup> 507.0708, found 507.0700.

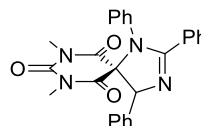

**1-Benzyl-7,9-dimethyl-2,4-diphenyl-1,3,7,9-tetraazaspiro[4.5]dec-2-ene-6,8,10-trione (5aa).**

General procedure was followed to afford **5aa** as a white solid (63.7 mg, 70% yield); <sup>1</sup>H NMR (400 MHz, CDCl<sub>3</sub>) δ 7.80–7.73 (m, 2H), 7.51–7.45 (m, 3H), 7.32–7.27 (m, 3H), 7.23–7.12 (m, 7H), 5.61 (s, 1H), 4.55 (d, *J* = 13.8 Hz, 1H), 4.18 (d, *J* = 13.8 Hz, 1H), 3.12 (s, 3H), 2.53 (s, 3H); <sup>13</sup>C NMR (101 MHz, CDCl<sub>3</sub>) δ 169.7, 167.5, 166.0, 149.8, 136.3, 134.5, 130.4, 130.3 (3C), 128.8, 128.7 (4C), 128.4 (2C), 128.32, 128.27 (2C), 127.5 (2C), 83.1, 80.0, 50.8, 29.1, 28.0; HRMS (ESI-TOF) calcd for C<sub>27</sub>H<sub>25</sub>N<sub>4</sub>O<sub>3</sub> [M + H]<sup>+</sup> 453.1927, found 453.1930.

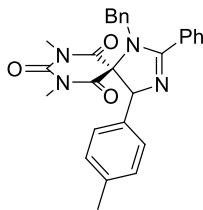

**1-Benzyl-7,9-dimethyl-2-phenyl-4-p-tolyl-1,3,7,9-tetraazaspiro[4.5]dec-2-ene-6,8,10-trione (5ba).** General procedure was followed to afford **5ba** as a white solid (62.5 mg, 67% yield);  $^1\text{H}$  NMR (400 MHz,  $\text{CDCl}_3$ )  $\delta$  7.79–7.72 (m, 2H), 7.50–7.43 (m, 3H), 7.23–7.17 (m, 3H), 7.17–7.12 (m, 2H), 7.09 (d,  $J = 8.1$  Hz, 2H), 7.04 (d,  $J = 8.1$  Hz, 2H), 5.57 (s, 1H), 4.54 (d,  $J = 13.9$  Hz, 1H), 4.18 (d,  $J = 13.9$  Hz, 1H), 3.12 (s, 3H), 2.55 (s, 3H), 2.30 (s, 3H);  $^{13}\text{C}$  NMR (101 MHz,  $\text{CDCl}_3$ )  $\delta$  169.7, 167.4, 166.0, 149.9, 138.6, 134.6, 133.2, 130.5, 130.3 (3C), 129.0 (2C), 128.7 (2C), 128.6 (2C), 128.2 (3C), 127.4 (2C), 83.1, 80.1, 50.8, 29.0, 28.0, 21.3; HRMS (ESI-TOF) calcd for  $\text{C}_{28}\text{H}_{27}\text{N}_4\text{O}_3$   $[\text{M} + \text{H}]^+$  467.2083, found 467.2086.

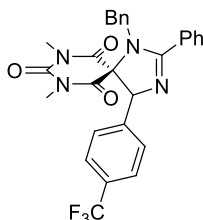

**1-Benzyl-7,9-dimethyl-2-phenyl-4-(4-(trifluoromethyl)phenyl)-1,3,7,9-tetraazaspiro[4.5]dec-2-ene-6,8,10-trione (5ca).** General procedure was followed to afford **5ca** as a white solid (73.7 mg, 71% yield);  $^1\text{H}$  NMR (400 MHz,  $\text{CDCl}_3$ )  $\delta$  7.81–7.75 (m, 2H), 7.56 (d,  $J = 8.1$  Hz, 2H), 7.53–7.47 (m, 3H), 7.31 (d,  $J = 8.1$  Hz, 2H), 7.25–7.19 (m, 3H), 7.16–7.09 (m, 2H), 5.67 (s, 1H), 4.55 (d,  $J = 13.7$  Hz, 1H), 4.20 (d,  $J = 13.7$  Hz, 1H), 3.11 (s, 3H), 2.54 (s, 3H);  $^{13}\text{C}$  NMR (101 MHz,  $\text{CDCl}_3$ )  $\delta$  169.5, 167.9, 165.7, 149.6, 140.6, 134.0, 131.0 (q,  $J = 32.6$  Hz), 130.6, 130.4 (2C), 130.1, 128.8 (2C), 128.7 (2C), 128.6, 128.4 (2C), 128.1 (2C), 125.3 (q,  $J = 3.6$  Hz, 2C), 123.9 (q,  $J = 272.4$  Hz), 82.3, 79.0, 50.8, 29.2, 27.9;  $^{19}\text{F}$  NMR (376 MHz,  $\text{CDCl}_3$ )  $\delta$  -62.66 (s, 3F); HRMS (ESI-TOF) calcd for  $\text{C}_{28}\text{H}_{24}\text{F}_3\text{N}_4\text{O}_3$   $[\text{M} + \text{H}]^+$  521.1801, found 521.1800.

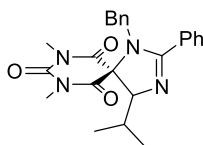

**1-Benzyl-4-isopropyl-7,9-dimethyl-2-phenyl-1,3,7,9-tetraazaspiro[4.5]dec-2-ene-6,8,10-trione (5da).** General procedure was followed to afford **5da** as a white solid (67.0 mg, 80% yield);  $^1\text{H}$  NMR (400 MHz,  $\text{CDCl}_3$ )  $\delta$  7.69–7.63 (m, 2H), 7.47–7.40 (m, 3H), 7.29–7.20 (m, 3H), 7.14–7.09 (m, 2H), 4.42 (d,  $J = 14.3$  Hz, 1H), 4.29 (d,  $J = 9.7$  Hz, 1H), 3.98 (d,  $J = 14.3$  Hz, 1H), 3.22 (s, 3H), 2.94 (s, 3H), 1.99–1.86 (m, 1H), 1.18 (d,  $J = 6.5$  Hz, 3H), 0.71 (d,  $J = 6.5$  Hz, 3H);  $^{13}\text{C}$  NMR (101 MHz,  $\text{CDCl}_3$ )  $\delta$  170.9, 167.0, 164.2, 150.0, 134.5, 130.6, 130.1, 129.7 (2C), 128.7 (2C), 128.6 (2C), 128.53, 128.46 (2C), 87.8, 74.9, 50.8, 30.5, 29.0, 28.3, 21.2, 20.4; HRMS (ESI-TOF) calcd for  $\text{C}_{24}\text{H}_{27}\text{N}_4\text{O}_3$   $[\text{M} + \text{H}]^+$  419.2083, found 419.2090.

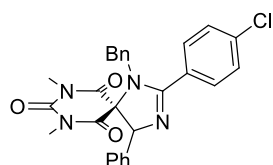

**1-Benzyl-2-(4-chlorophenyl)-7,9-dimethyl-4-phenyl-1,3,7,9-tetraazaspiro[4.5]dec-2-ene-6,8,10-trione (5ad).** General procedure was followed to afford **5ad** as a white solid (69.1 mg, 71% yield);  $^1\text{H NMR}$  (400 MHz,  $\text{CDCl}_3$ )  $\delta$  7.68 (d,  $J = 8.4$  Hz, 2H), 7.44 (d,  $J = 8.4$  Hz, 2H), 7.31–7.27 (m, 3H), 7.23–7.19 (m, 3H), 7.18–7.12 (m, 4H), 5.59 (s, 1H), 4.51 (d,  $J = 13.9$  Hz, 1H), 4.16 (d,  $J = 13.9$  Hz, 1H), 3.14 (s, 3H), 2.53 (s, 3H);  $^{13}\text{C NMR}$  (101 MHz,  $\text{CDCl}_3$ )  $\delta$  169.5, 166.6, 165.9, 149.7, 136.5, 136.0, 134.4, 130.2 (2C), 130.1 (2C), 129.0 (3C), 128.8, 128.5 (2C), 128.4, 128.3 (2C), 127.5 (2C), 83.0, 80.3, 50.9, 29.1, 28.0; HRMS (ESI-TOF) calcd for  $\text{C}_{27}\text{H}_{24}^{35}\text{ClN}_4\text{O}_3$   $[\text{M} + \text{H}]^+$  487.1537, found 487.1530.

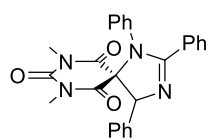

**7,9-Dimethyl-1,2,4-triphenyl-1,3,7,9-tetraazaspiro[4.5]dec-2-ene-6,8,10-trione (5ai).** General procedure was followed to afford **5ai** as a white solid (77.6 mg, 89% yield);  $^1\text{H NMR}$  (400 MHz,  $\text{CDCl}_3$ )  $\delta$  7.60–7.55 (m, 2H), 7.40–7.33 (m, 4H), 7.31–7.24 (m, 4H), 7.15 (t,  $J = 7.3$  Hz, 2H), 7.09 (t,  $J = 7.2$  Hz, 1H), 7.04–6.99 (m, 2H), 5.78 (s, 1H), 3.41 (s, 3H), 2.54 (s, 3H);  $^{13}\text{C NMR}$  (101 MHz,  $\text{CDCl}_3$ )  $\delta$  169.0, 165.8, 164.7, 150.1, 139.2, 136.0, 130.5, 129.7, 129.3 (2C), 129.2, 128.9 (2C), 128.6 (2C), 128.2 (2C), 127.8 (2C), 126.9 (2C), 126.5, 83.7, 83.0, 29.6, 28.3; HRMS (ESI-TOF) calcd for  $\text{C}_{26}\text{H}_{23}\text{N}_4\text{O}_3$   $[\text{M} + \text{H}]^+$  439.1770, found 439.1770.

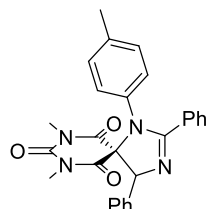

**7,9-Dimethyl-2,4-diphenyl-1-p-tolyl-1,3,7,9-tetraazaspiro[4.5]dec-2-ene-6,8,10-trione (5aj).** General procedure was followed to afford **5aj** as a white solid (79.8 mg, 88% yield);  $^1\text{H NMR}$  (400 MHz,  $\text{CDCl}_3$ )  $\delta$  7.60–7.55 (m, 2H), 7.39–7.32 (m, 4H), 7.31–7.24 (m, 4H), 6.94 (s, 4H), 5.76 (s, 1H), 3.40 (s, 3H), 2.52 (s, 3H), 2.23 (s, 3H);  $^{13}\text{C NMR}$  (101 MHz,  $\text{CDCl}_3$ )  $\delta$  169.2, 165.8, 164.9, 150.1, 136.6, 136.5, 136.1, 130.4, 129.8, 129.5 (2C), 129.3 (2C), 129.2, 128.6 (2C), 128.1 (2C), 127.8 (2C), 127.1 (2C), 83.7, 83.2, 29.5, 28.3, 21.1; HRMS (ESI-TOF) calcd for  $\text{C}_{27}\text{H}_{25}\text{N}_4\text{O}_3$   $[\text{M} + \text{H}]^+$  453.1927, found 453.1933.

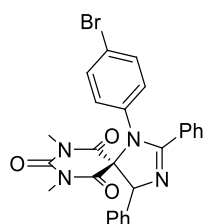

**1-(4-Bromophenyl)-7,9-dimethyl-2,4-diphenyl-1,3,7,9-tetraazaspiro[4.5]dec-2-ene-6,8,10-trione (5am)**. General procedure was followed to afford **5am** as a white solid (95.3 mg, 92% yield); <sup>1</sup>H NMR (400 MHz, CDCl<sub>3</sub>) δ 7.59–7.54 (m, 2H), 7.39 (t, *J* = 7.4 Hz, 1H), 7.37–7.33 (m, 3H), 7.31 (t, *J* = 7.5 Hz, 2H), 7.28–7.22 (m, 4H), 6.92 (d, *J* = 8.8 Hz, 2H), 5.75 (s, 1H), 3.41 (s, 3H), 2.52 (s, 3H); <sup>13</sup>C NMR (101 MHz, CDCl<sub>3</sub>) δ 168.8, 165.6, 164.4, 149.9, 138.3, 135.7, 132.0 (2C), 130.7, 129.3 (2C), 129.2 (2C), 128.7 (2C), 128.6 (2C), 128.3 (2C), 127.7 (2C), 120.1, 83.8, 83.0, 29.6, 28.3; HRMS (ESI-TOF) calcd for C<sub>26</sub>H<sub>22</sub><sup>79</sup>BrN<sub>4</sub>O<sub>3</sub> [M + H]<sup>+</sup> 517.0875, found 517.0875.

### 3. Typical procedure for the gram-scale synthesis of **3aa**

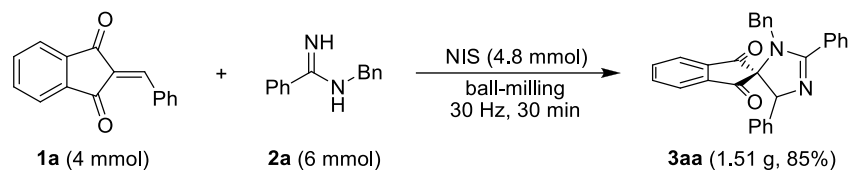

A mixture of **1a** (468 mg, 2 mmol), **2a** (631 mg, 3 mmol) and NIS (540 mg, 2.4 mmol) together with a stainless ball (12 mm in diameter) were introduced into a stainless steel jar (10 mL). The same mixture was also introduced into another parallel jar. The two reaction vessels were closed and fixed on the vibration arms of a Retsch MM400 mixer mill, and were vibrated vigorously at a rate of 1800 rounds per minute (30 Hz) at room temperature for 30 min. After completion of the reaction, the reaction vessels were washed with acetone three times (3 × 6 mL), and the combined solution was evaporated to remove the solvent in vacuo. The residue was separated by flash column chromatography on silica gel with acetone/petroleum ether (1:6) as the eluent to afford **3aa** as a yellow solid (1.51 g, 85%).

### 4. Synthesis and characterization of **6aa**

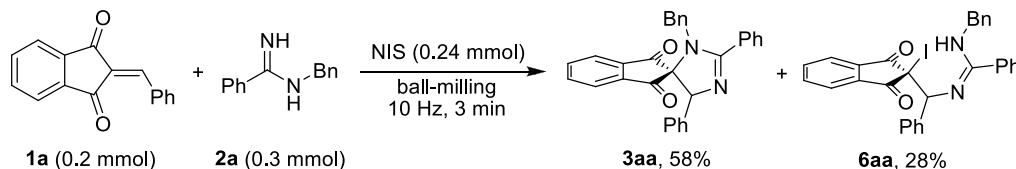

A mixture of **1a** (0.2 mmol), **2a** (0.3 mmol) and NIS (0.24 mmol) together with a stainless ball (10 mm in diameter) were introduced into a stainless steel jar (10 mL). The reaction vessel along with another identical empty vessel were closed and fixed on the vibration arms of a Retsch MM400 mixer mill, and were vibrated at a rate of 600 rounds per minute (10 Hz) at room temperature for 3 min. After completion of the reaction, the reaction vessel was washed with acetone three times (3 × 6 mL), and the combined solution was evaporated to remove the solvent in vacuo. The residue was separated by flash column chromatography on silica gel with acetone/petroleum ether (1:6) as the eluent to afford **6aa** as a yellow solid (31.8 mg, 28%), along with **3aa** (51.0 mg, 58%) and recovered **1a** (4.6 mg, 10%).

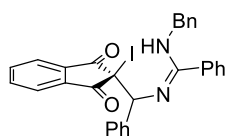

***N*-Benzyl-*N'*-((2-iodo-1,3-dioxo-2,3-dihydro-1*H*-inden-2-yl)(phenyl)methyl)benzimidamide (6aa).** <sup>1</sup>H NMR (400 MHz, CDCl<sub>3</sub>) δ 8.00 (d, *J* = 7.6 Hz, 1H), 7.84–7.80 (m, 2H), 7.78 (td, *J* = 7.5, 1.3 Hz, 1H), 7.71 (td, *J* = 7.3, 1.0 Hz, 1H), 7.67 (d, *J* = 7.4 Hz, 1H), 7.51–7.45 (m, 3H), 7.33–7.21 (m, 6H), 7.17–7.12 (m, 2H), 7.02 (d, *J* = 6.6 Hz, 2H), 5.11 (s, 1H), 4.88 (d, *J* = 15.8 Hz, 1H), 4.05 (d, *J* = 15.8 Hz, 1H); <sup>13</sup>C NMR (101 MHz, CDCl<sub>3</sub>) δ 199.7, 196.4, 170.9, 142.5, 141.5, 136.2, 135.8, 135.3, 134.3, 130.8, 130.3, 128.9 (2C), 128.85 (2C), 128.80 (2C), 128.6 (2C), 128.4, 128.05 (2C), 128.02 (2C), 127.9, 123.9, 123.8, 81.3, 69.4, 49.5; HRMS (ESI-TOF) calcd for C<sub>30</sub>H<sub>23</sub>N<sub>2</sub>O<sub>2</sub> [M – I]<sup>+</sup> 443.1754, found 443.1753.



## 5. NMR spectra of 3, 5 and 6aa

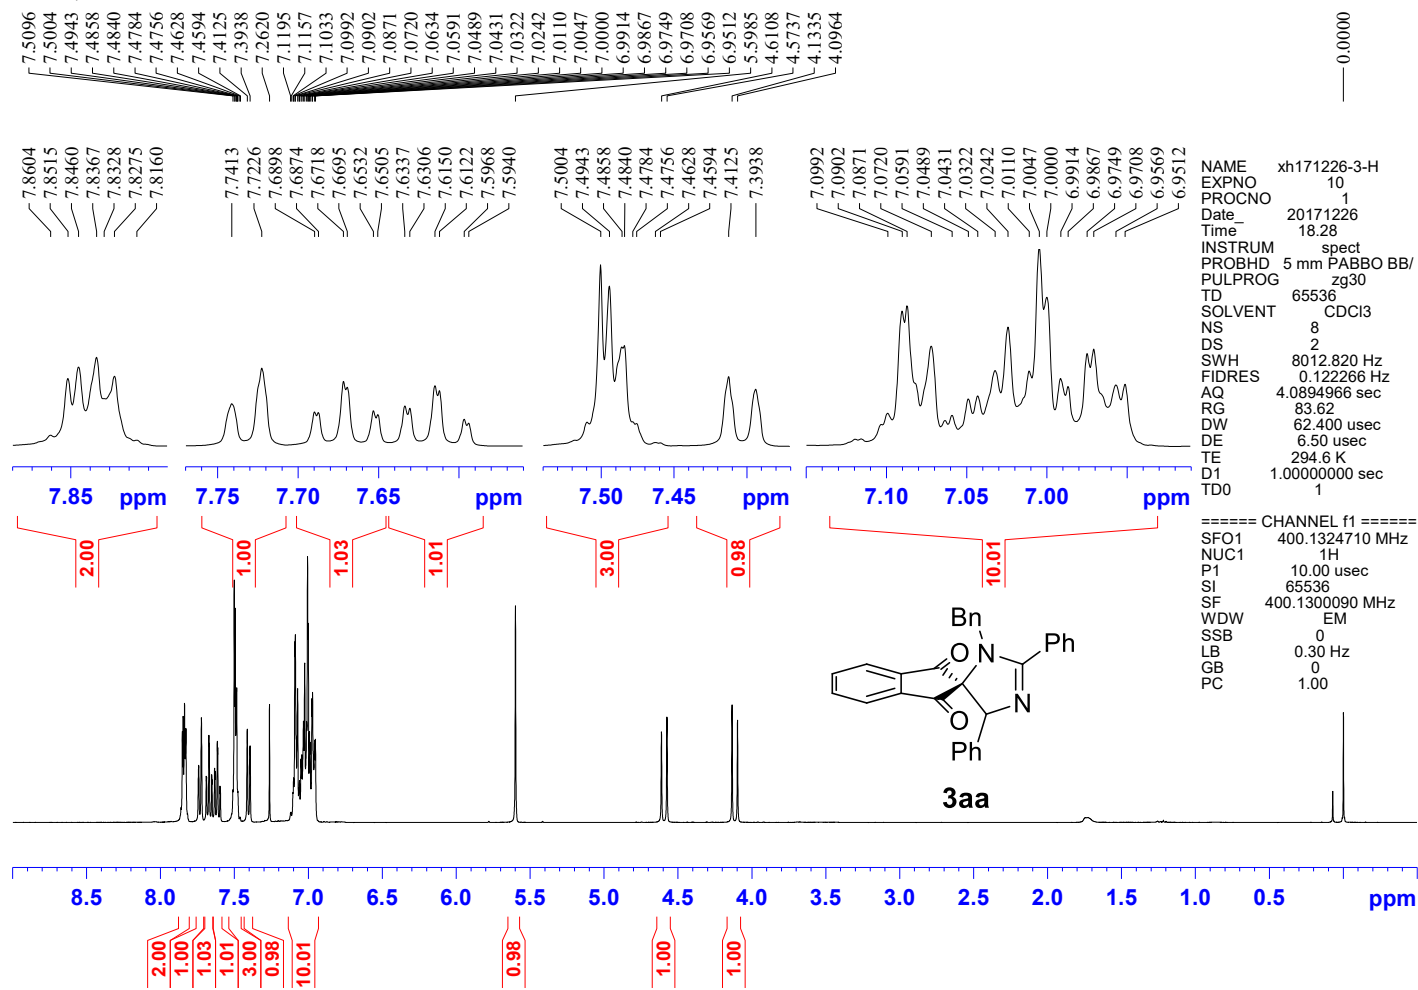

Figure S1. <sup>1</sup>H NMR (400 MHz, CDCl<sub>3</sub>) of compound 3aa

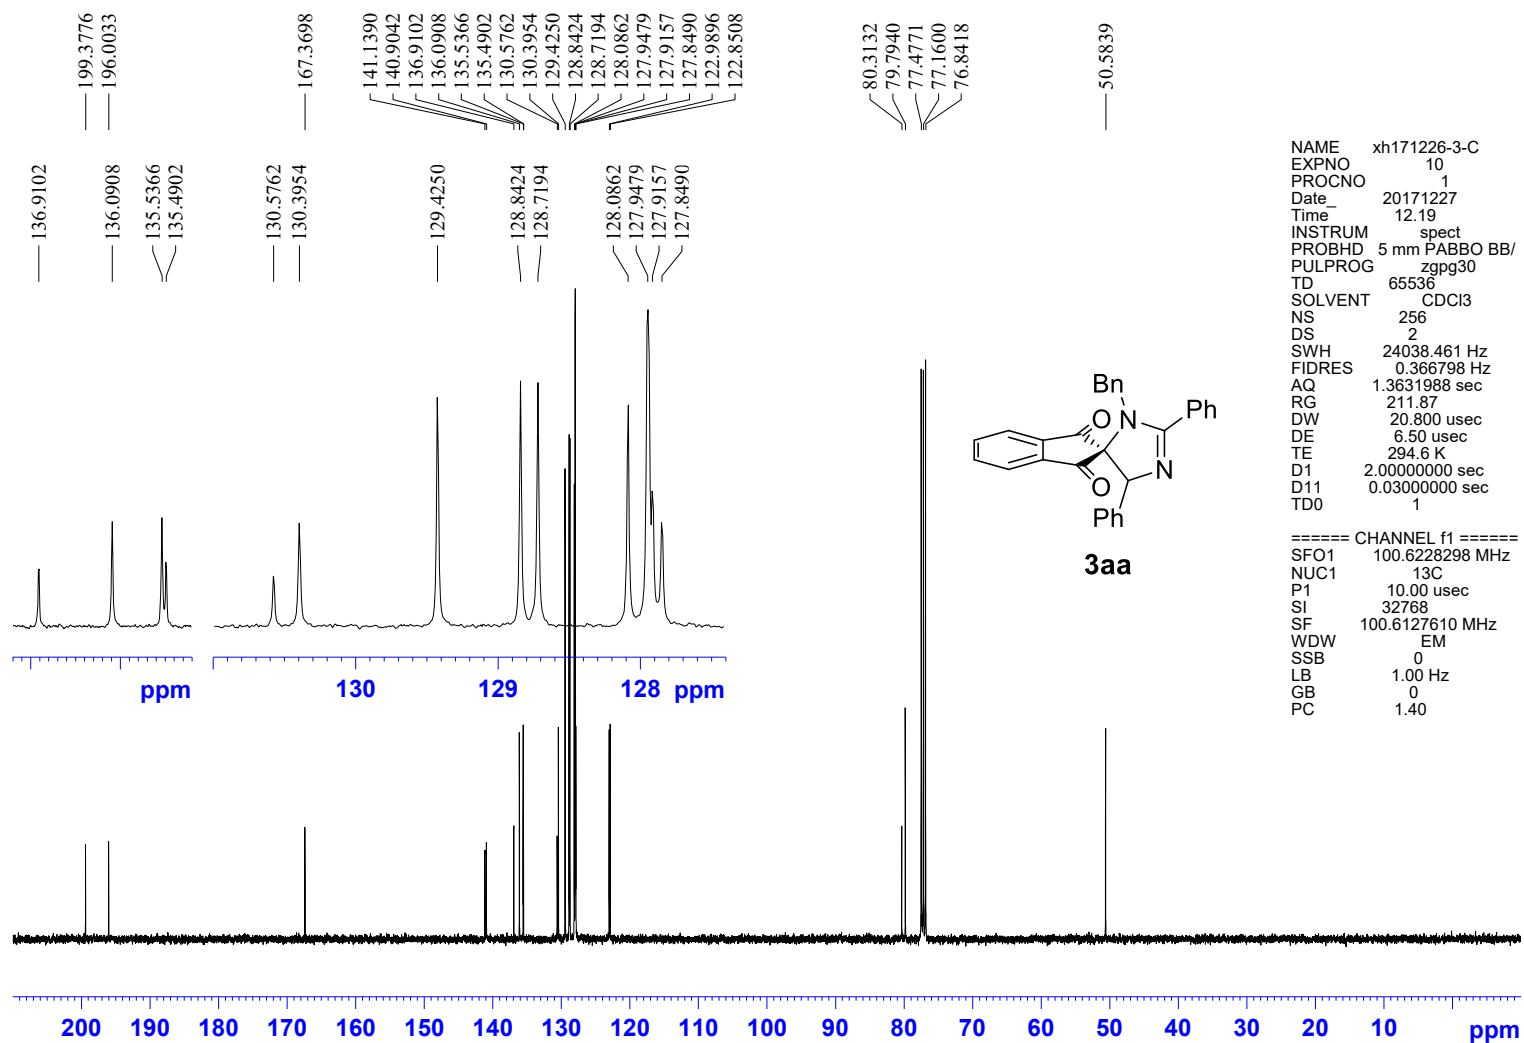

Figure S2. <sup>13</sup>C NMR (101 MHz, CDCl<sub>3</sub>) of compound 3aa

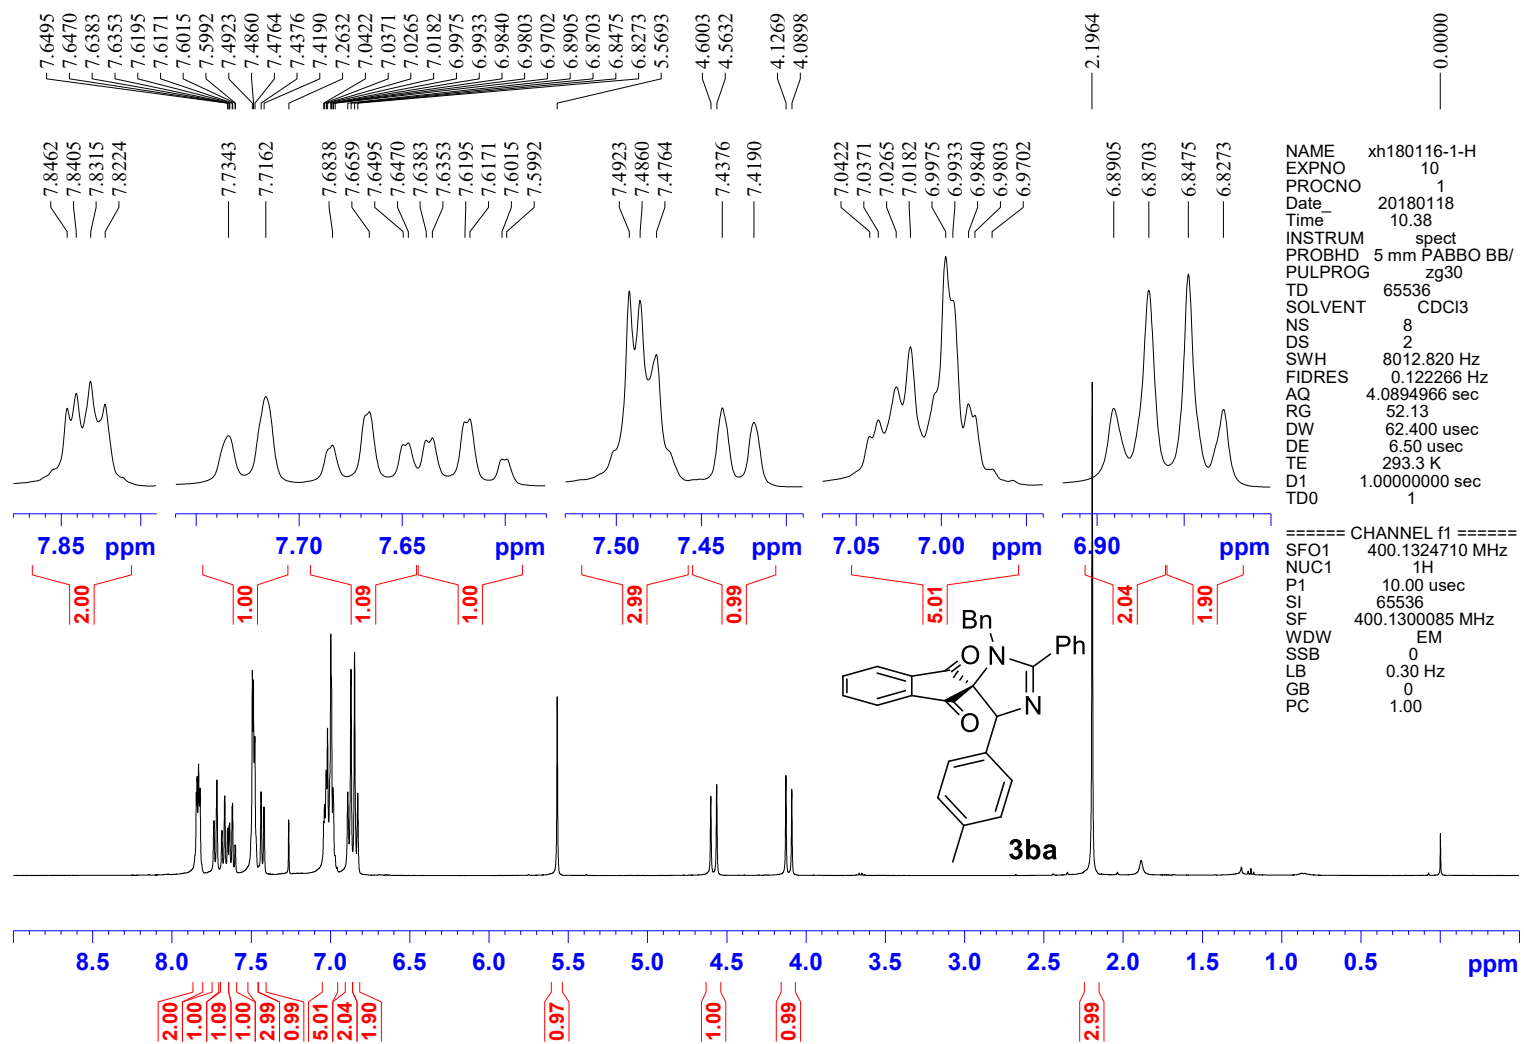

Figure S3. <sup>1</sup>H NMR (400 MHz, CDCl<sub>3</sub>) of compound 3ba

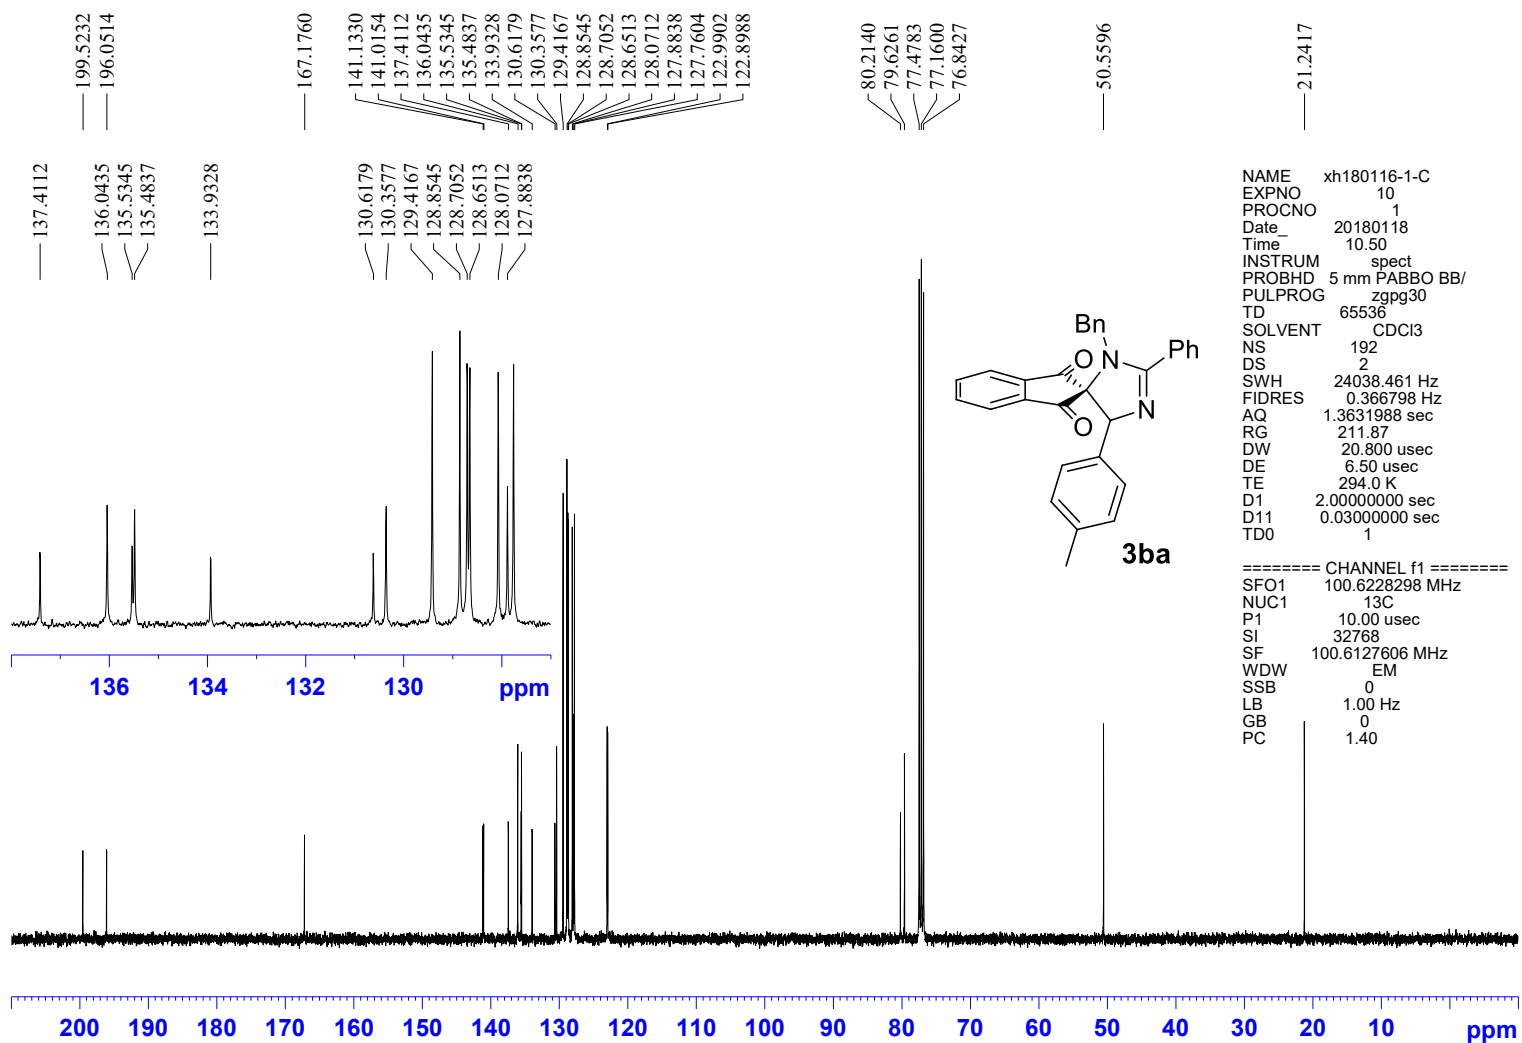

Figure S4. <sup>13</sup>C NMR (101 MHz, CDCl<sub>3</sub>) of compound 3ba

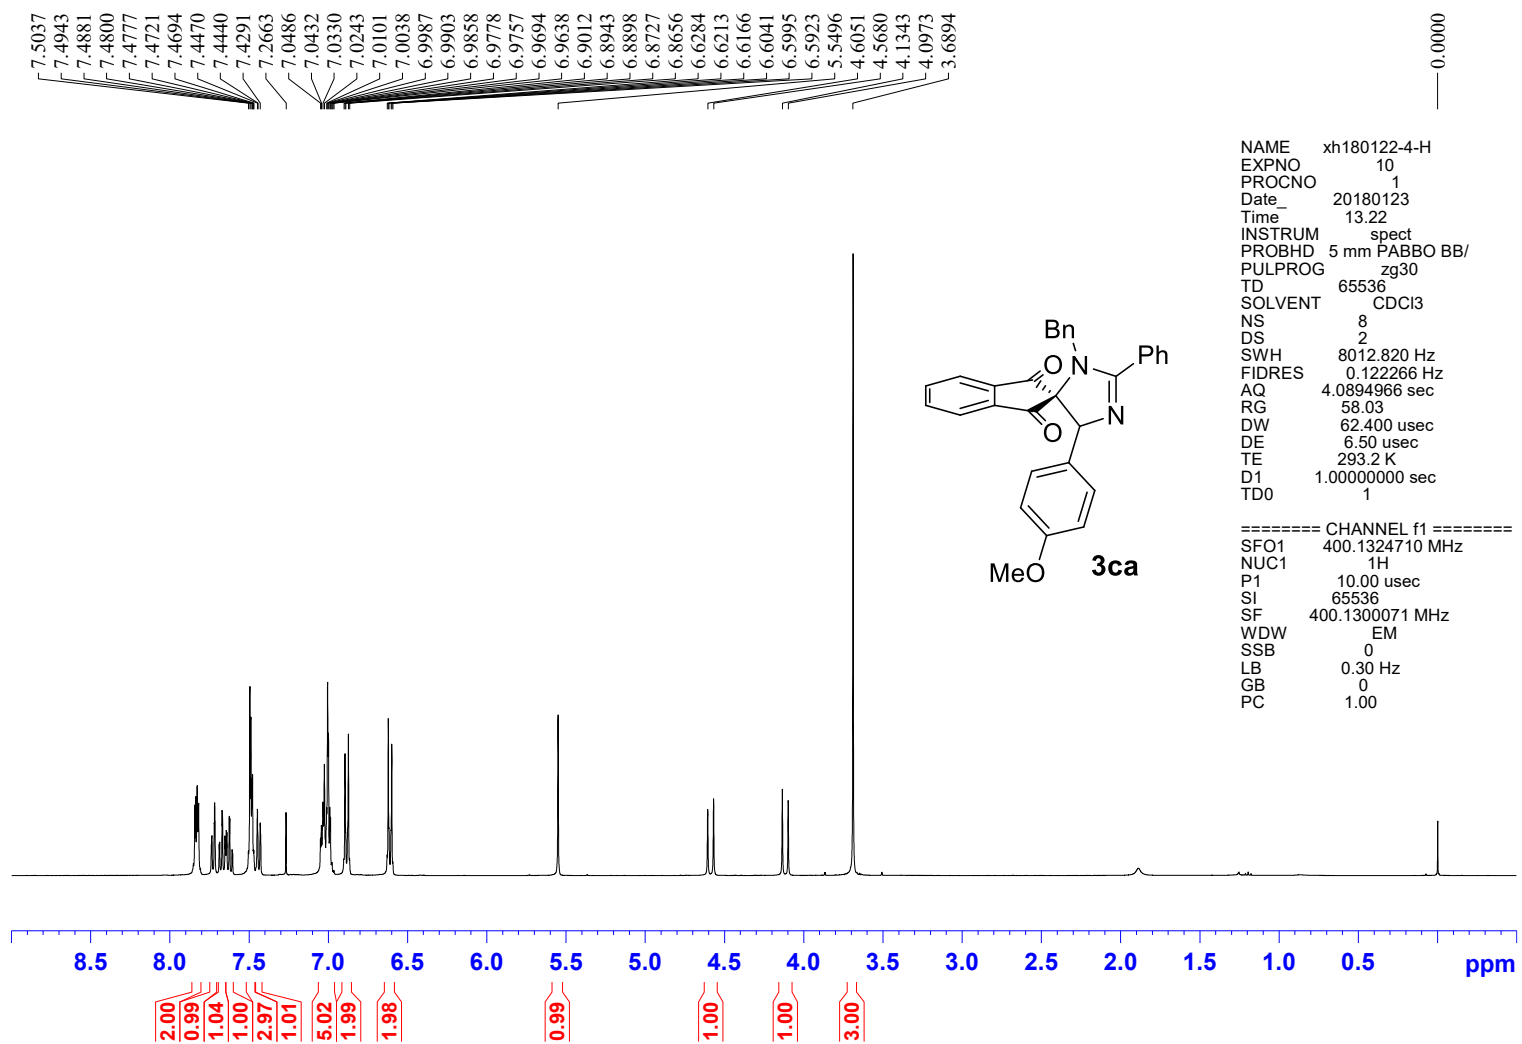

Figure S5. <sup>1</sup>H NMR (400 MHz, CDCl<sub>3</sub>) of compound 3ca

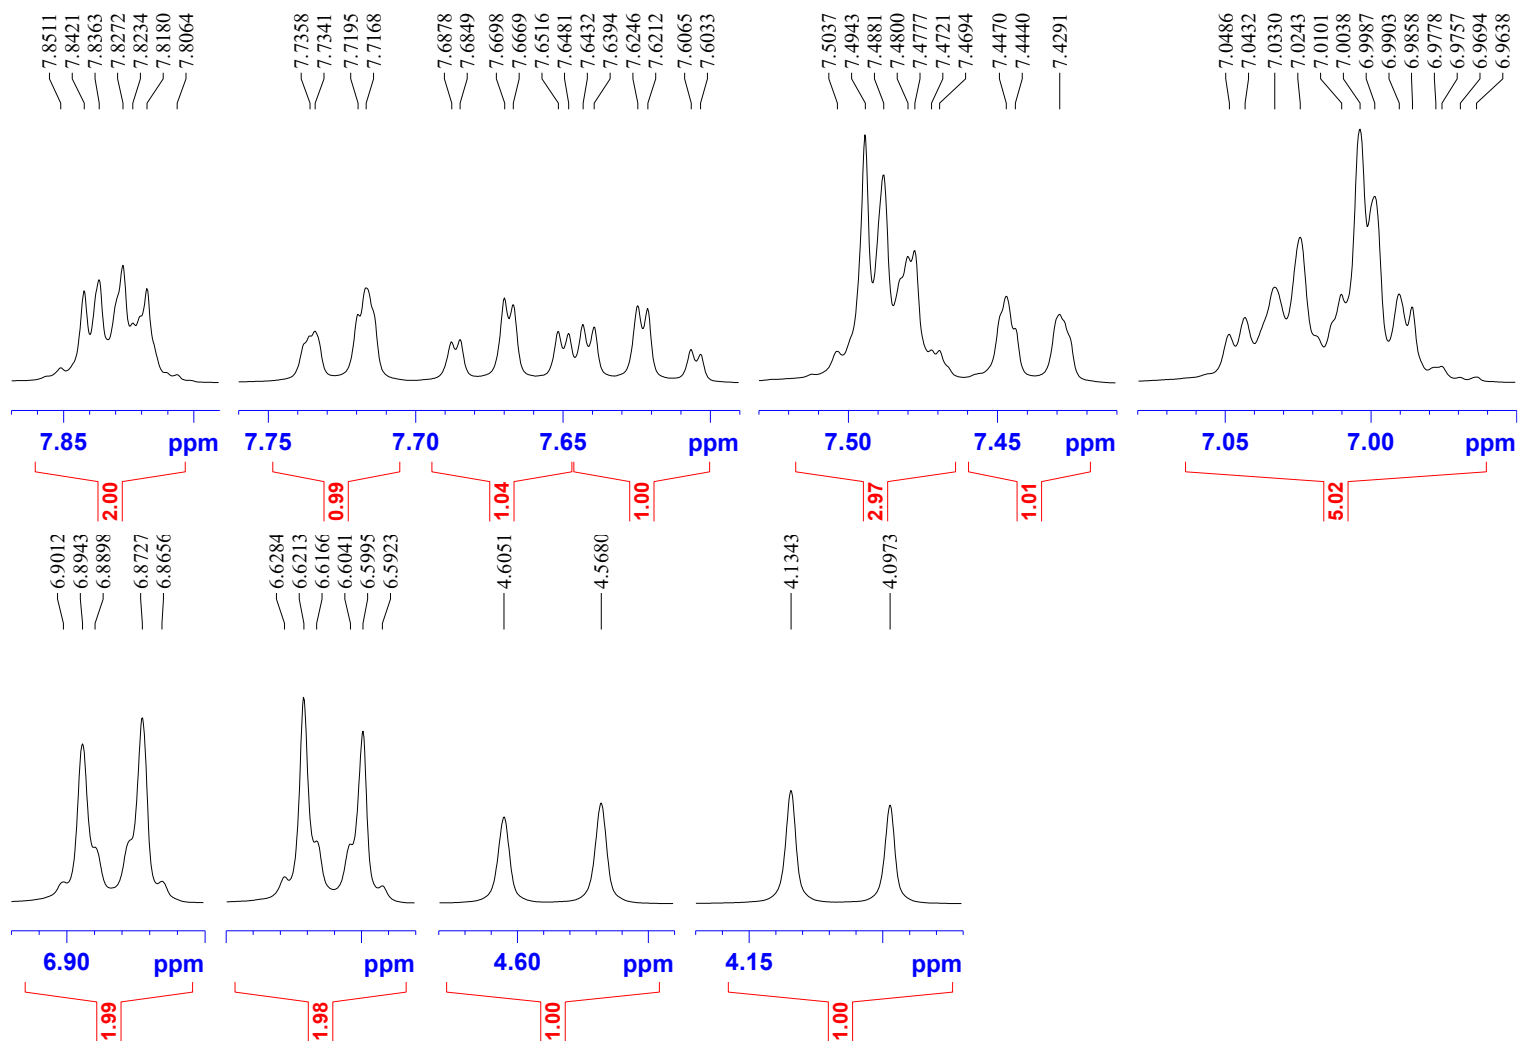

Figure S6. Expanded  $^1\text{H}$  NMR (400 MHz,  $\text{CDCl}_3$ ) of compound 3ca

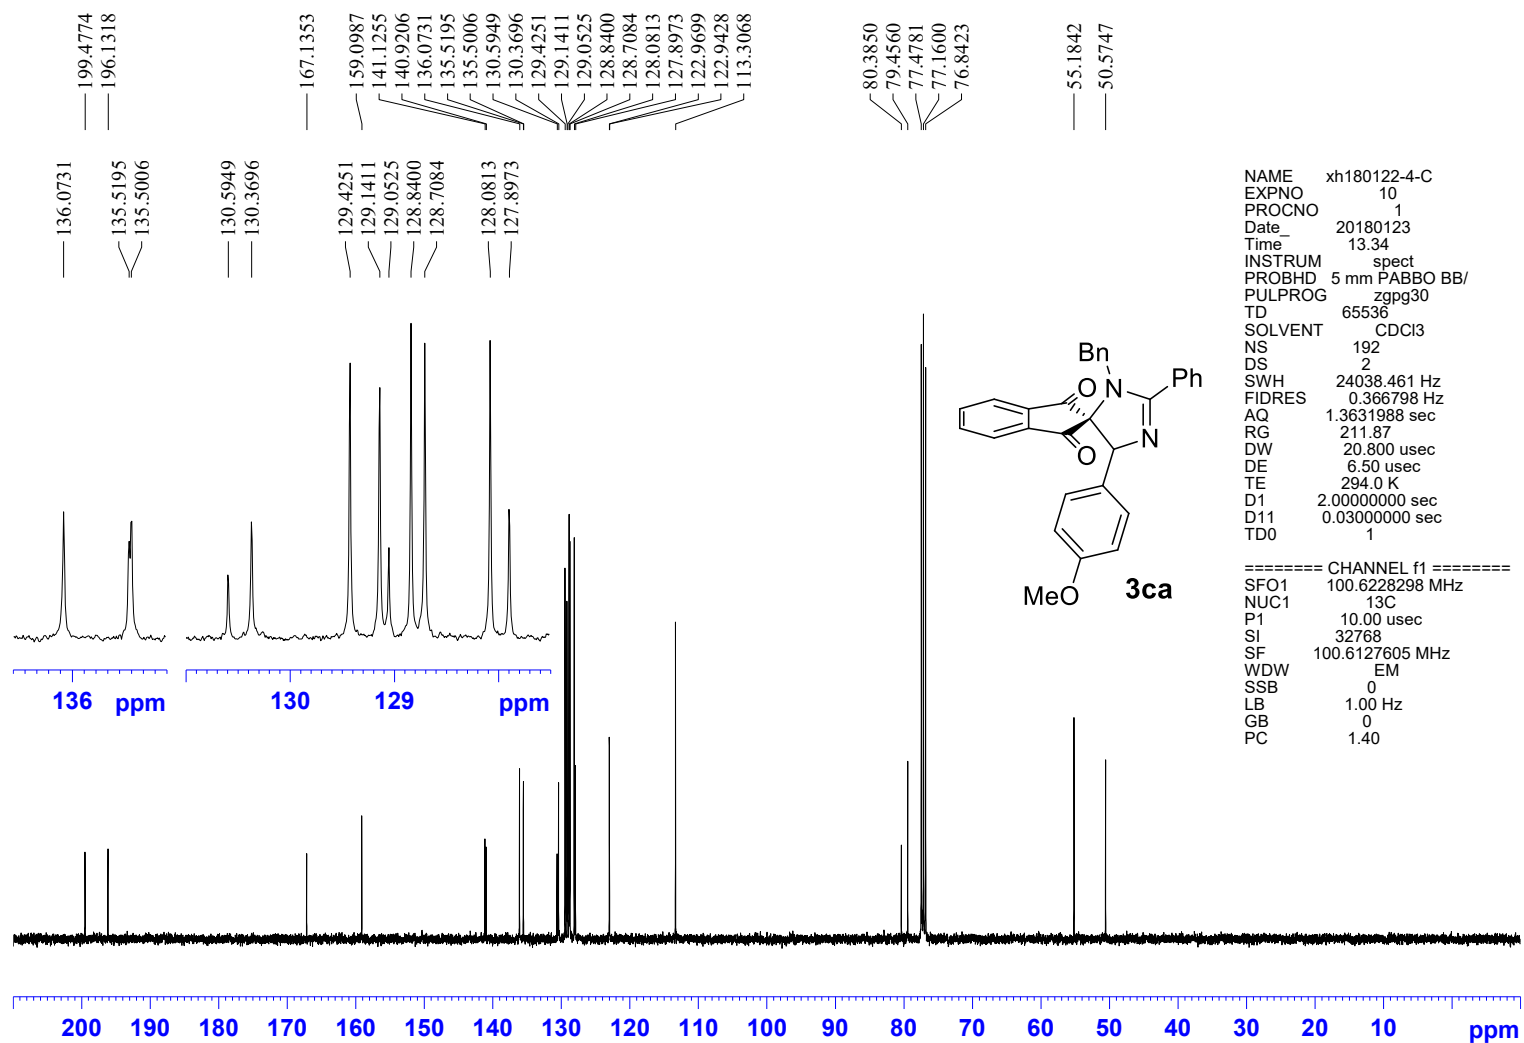

Figure S7. <sup>13</sup>C NMR (101 MHz, CDCl<sub>3</sub>) of compound 3ca

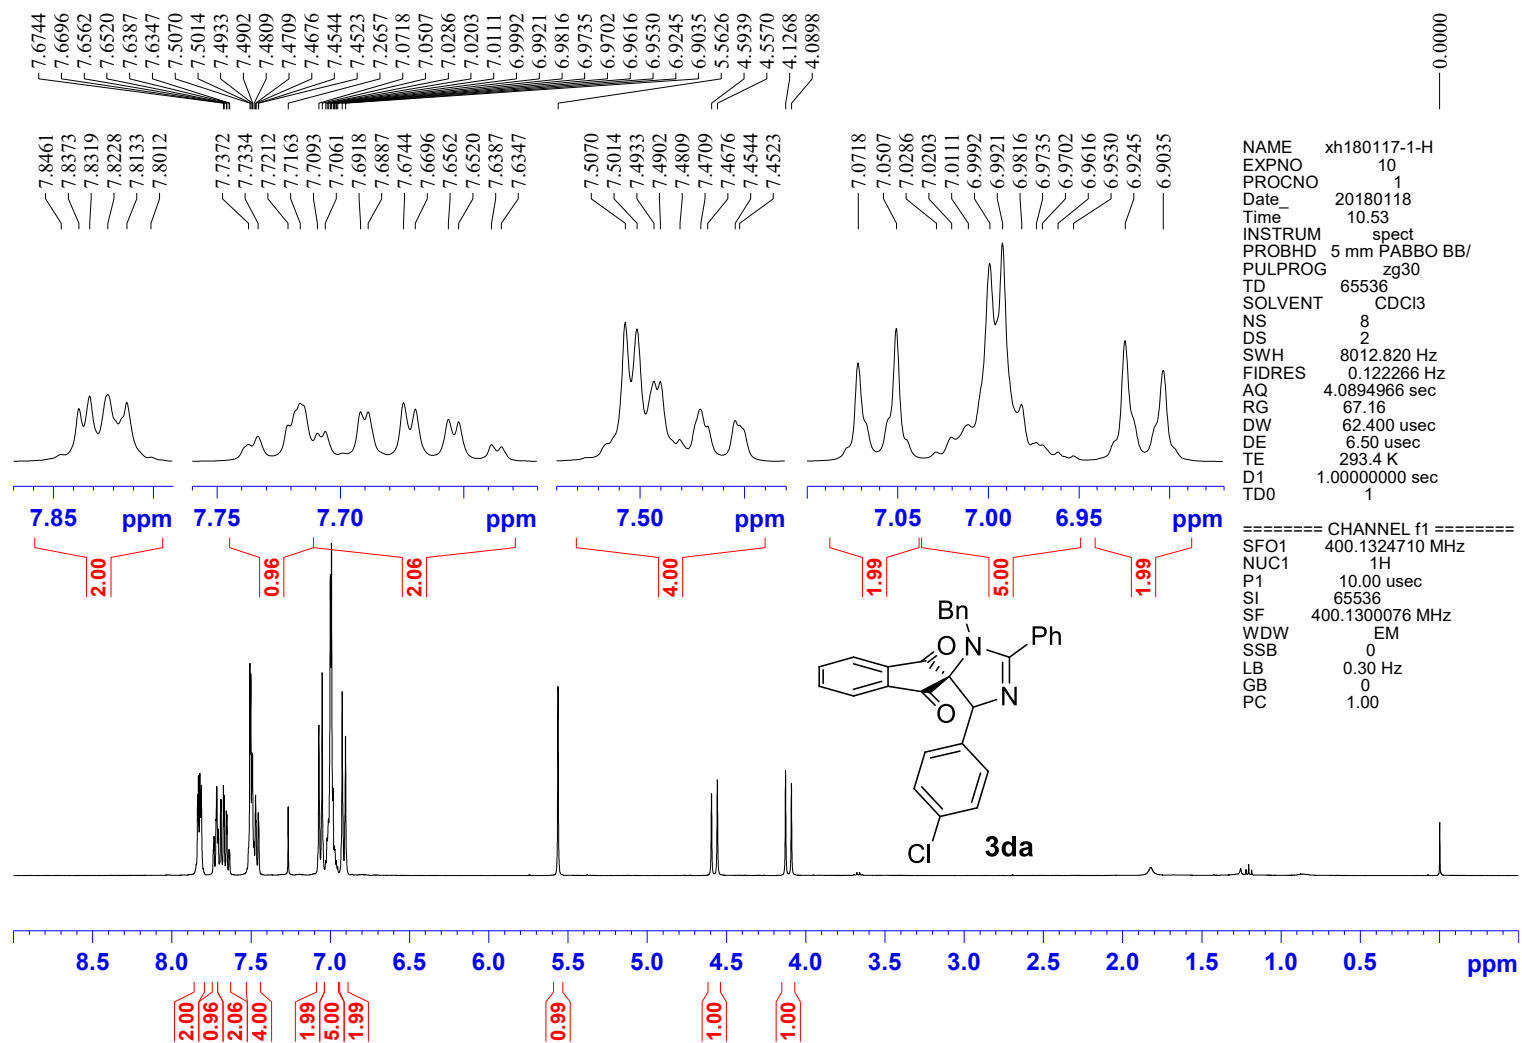



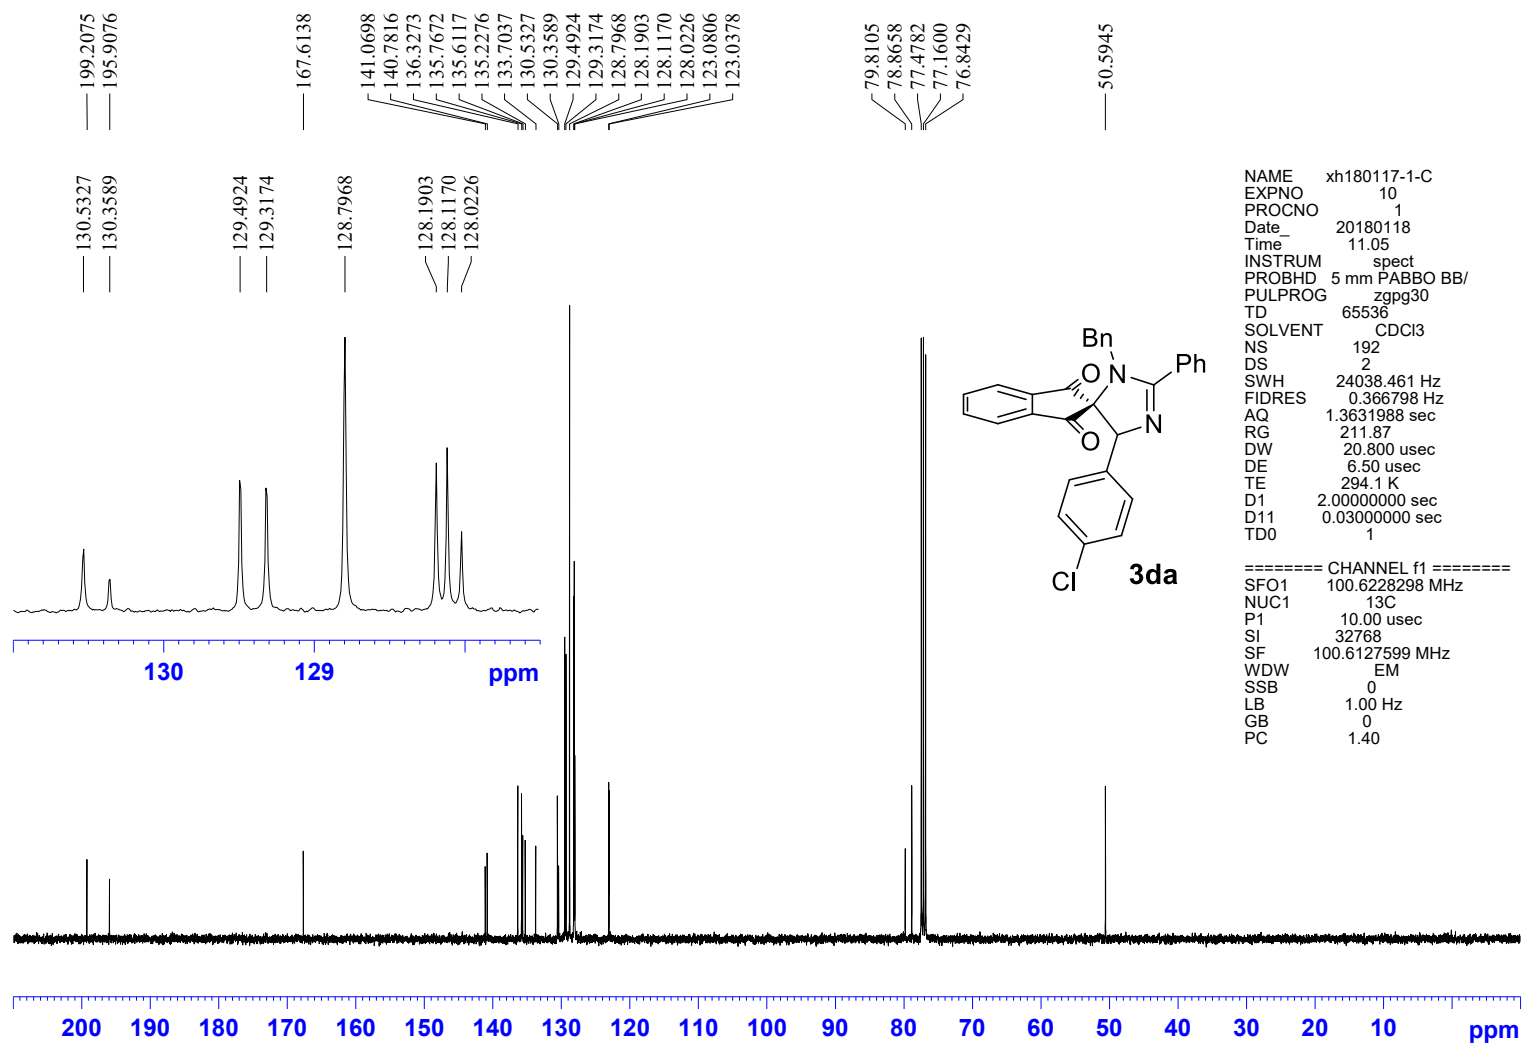

Figure S9. <sup>13</sup>C NMR (101 MHz, CDCl<sub>3</sub>) of compound 3da

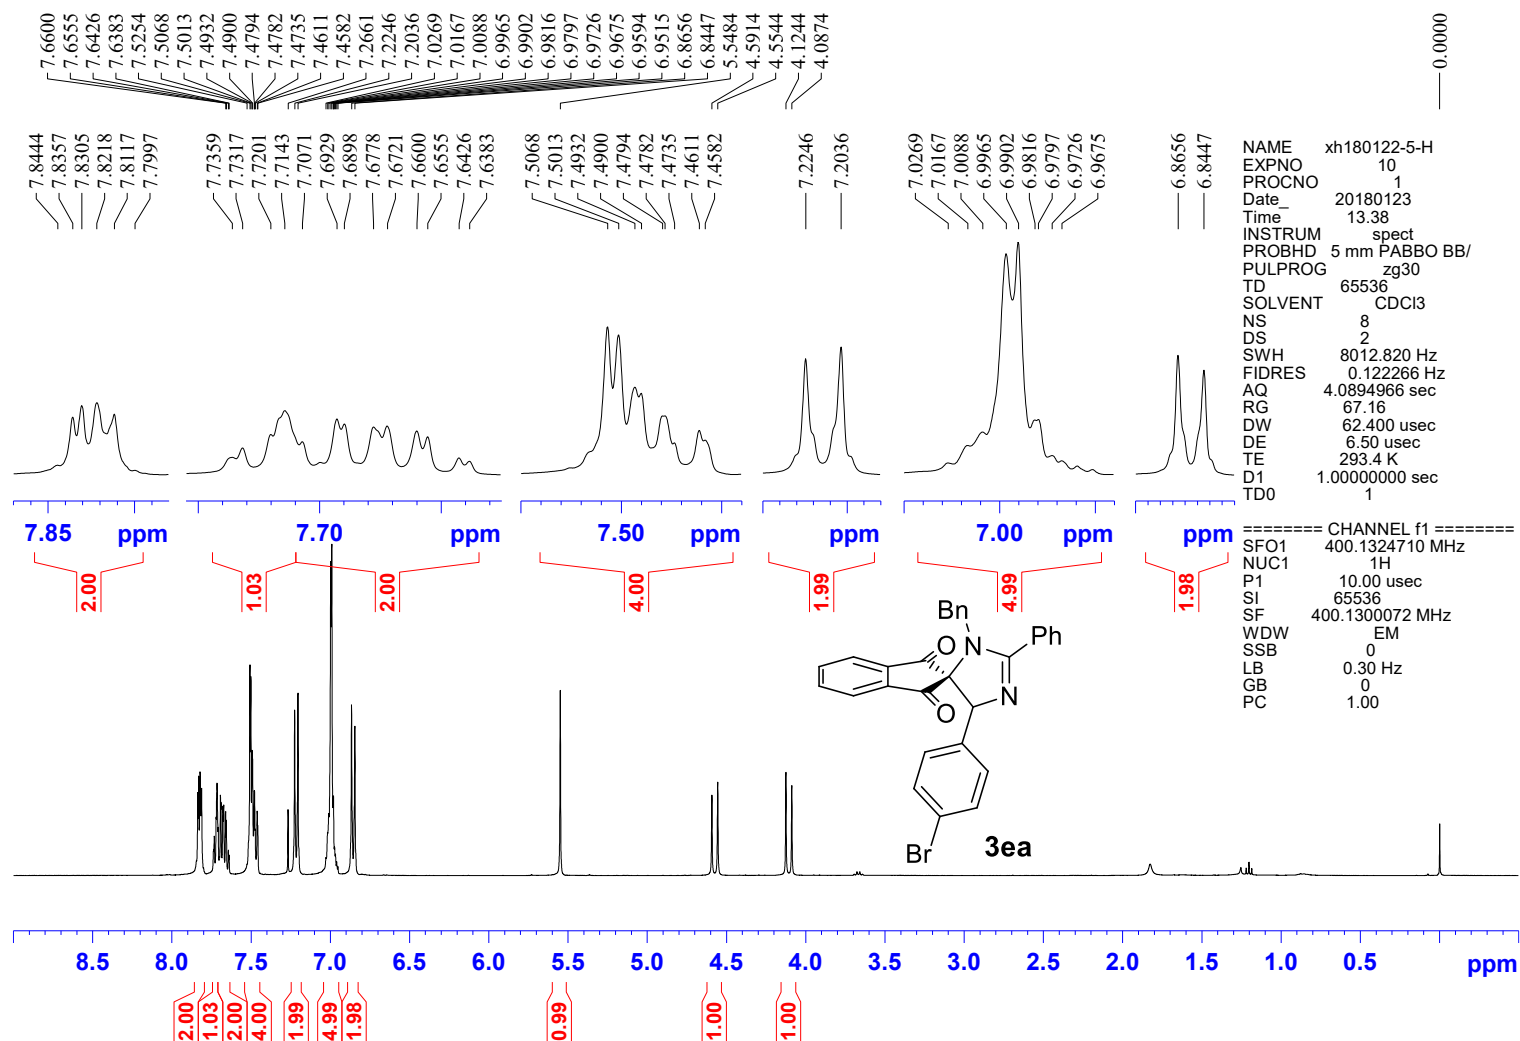

Figure S10.  $^1\text{H}$  NMR (400 MHz,  $\text{CDCl}_3$ ) of compound 3ea

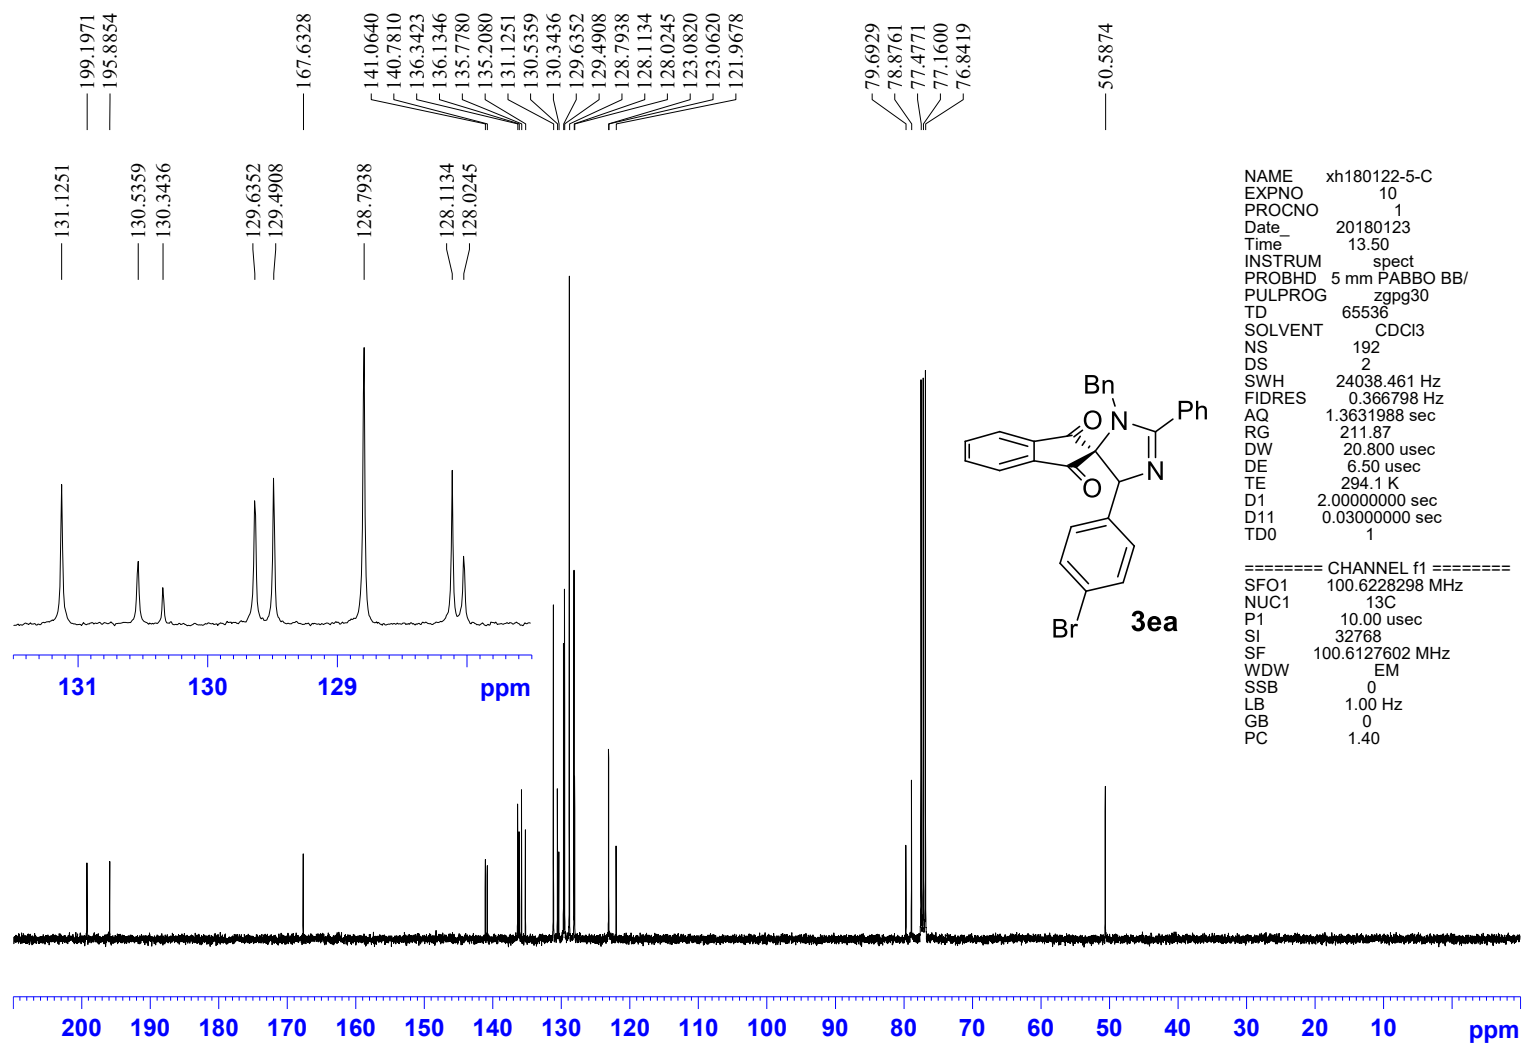

Figure S11. <sup>13</sup>C NMR (101 MHz, CDCl<sub>3</sub>) of compound 3ea

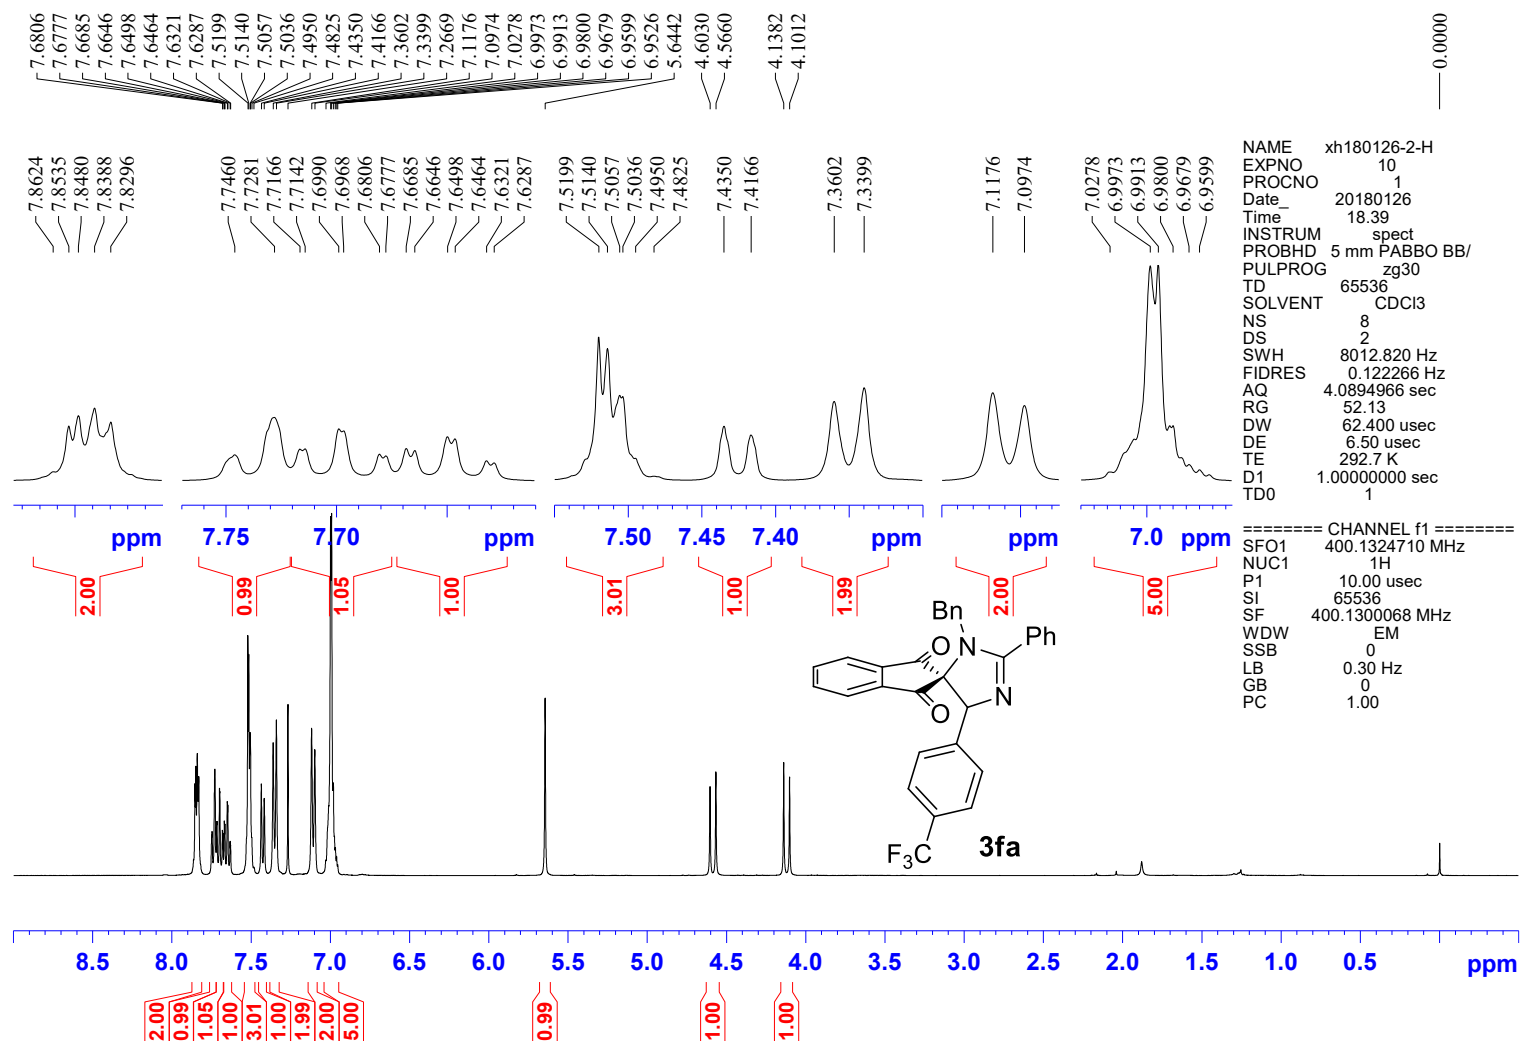

Figure S12. <sup>1</sup>H NMR (400 MHz, CDCl<sub>3</sub>) of compound **3fa**



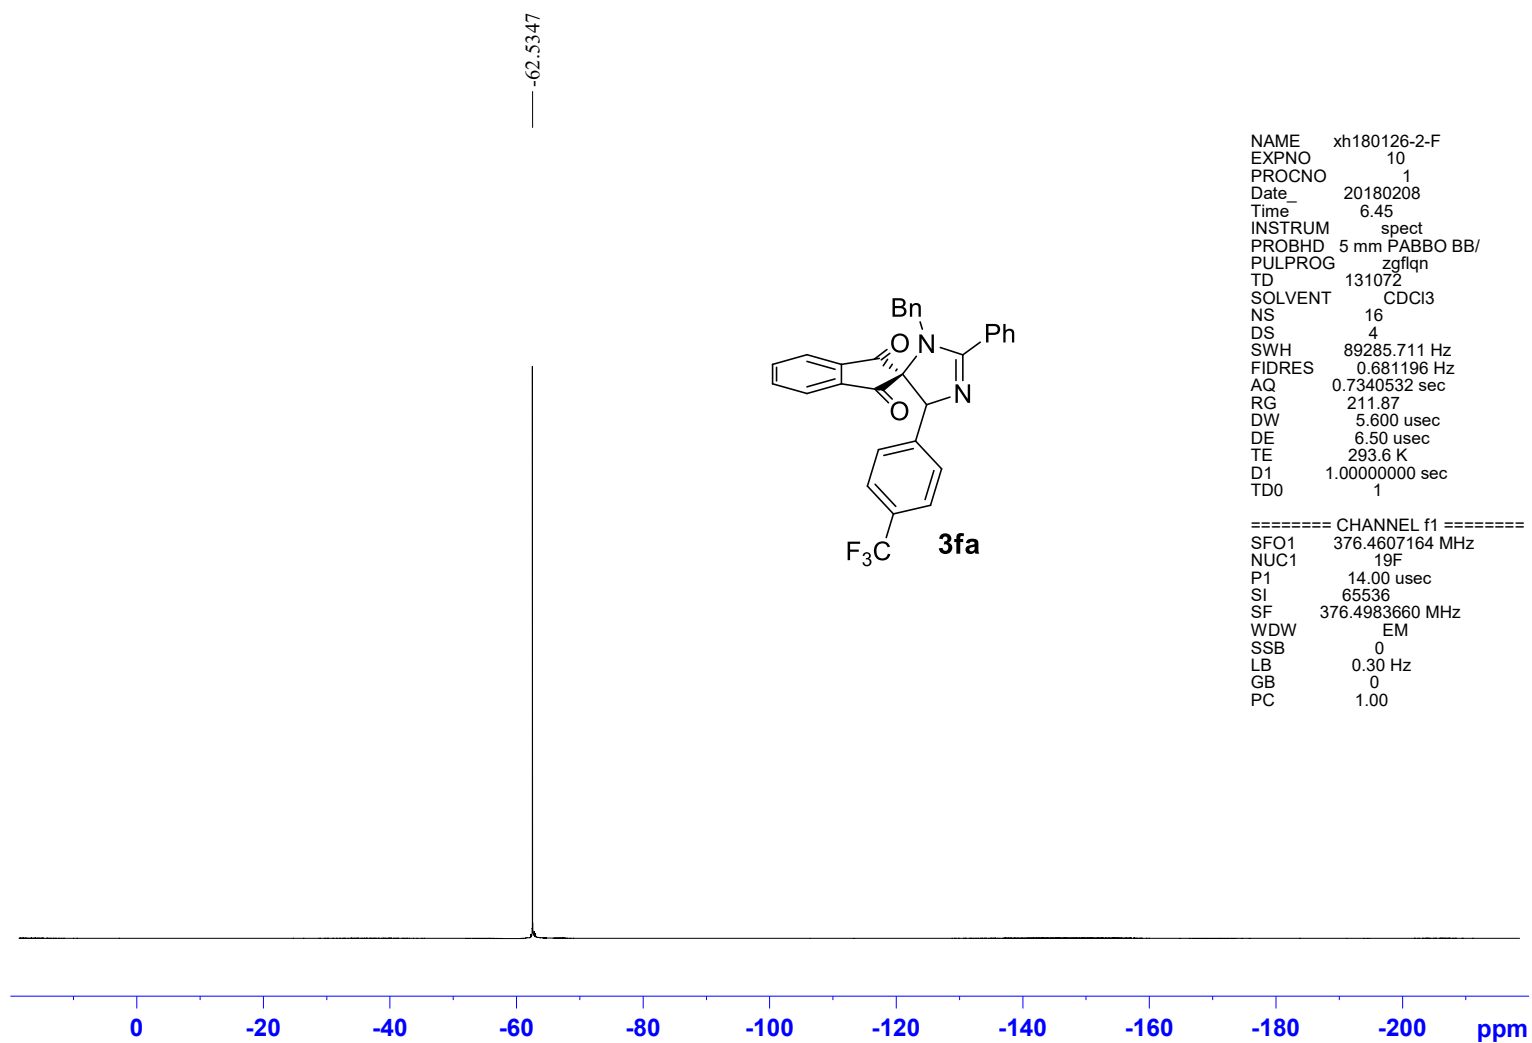

Figure S14.  $^{19}\text{F}$  NMR (376 MHz,  $\text{CDCl}_3$ ) of compound 3fa

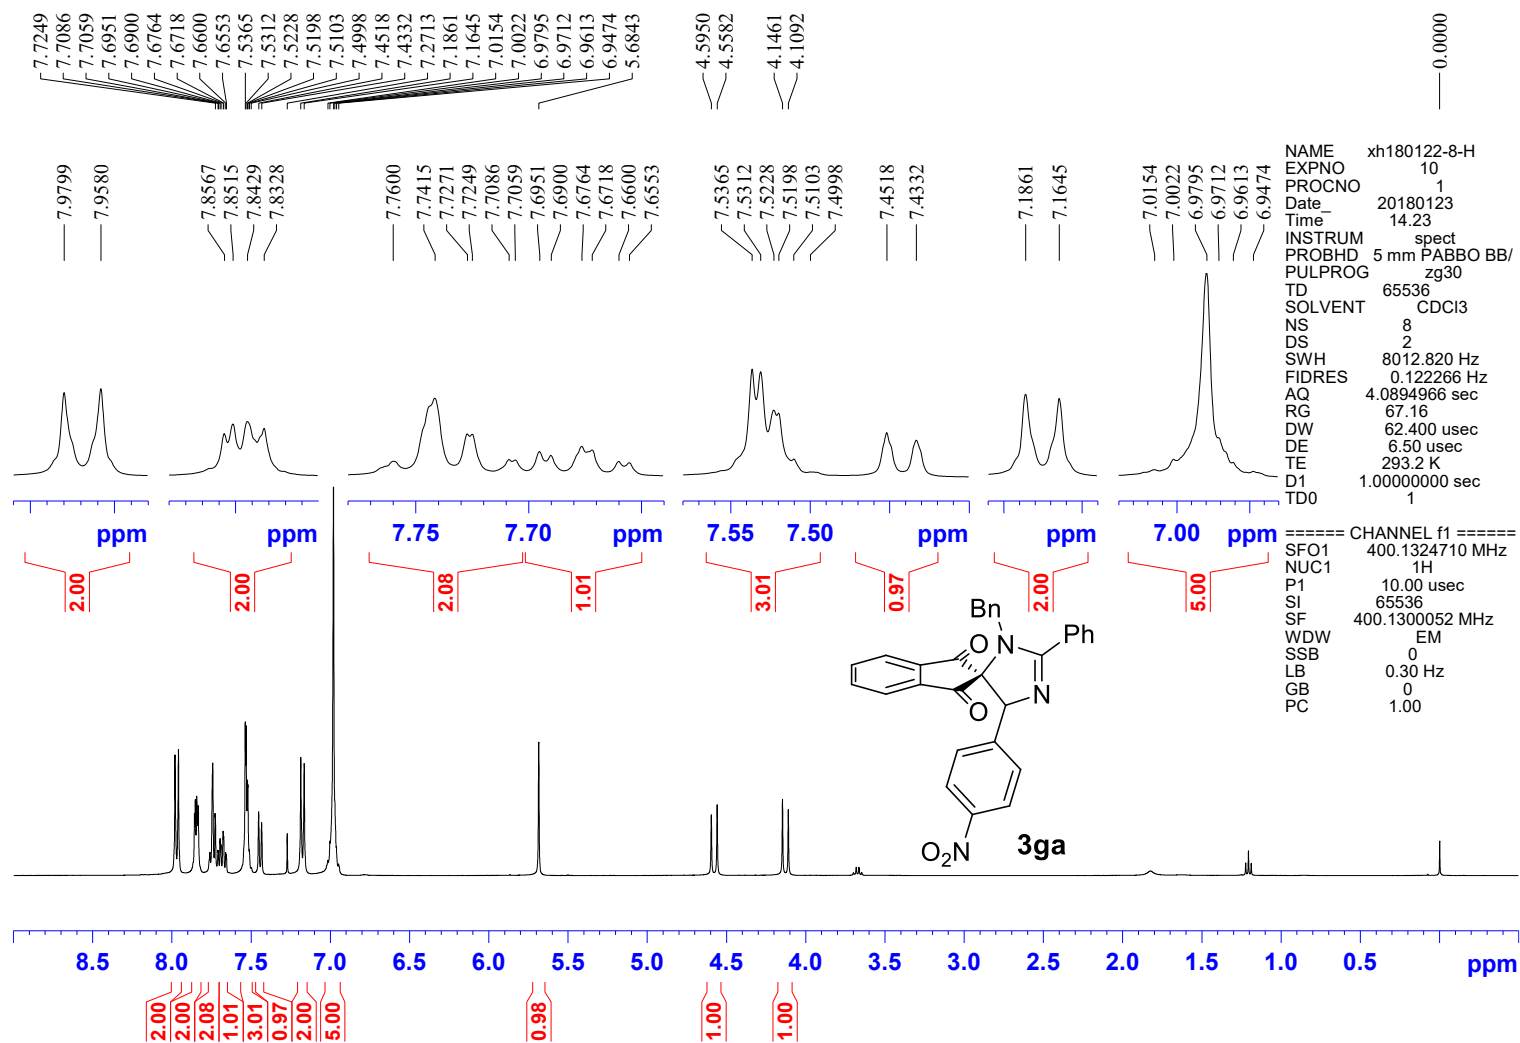

Figure S15.  $^1\text{H}$  NMR (400 MHz,  $\text{CDCl}_3$ ) of compound **3ga**

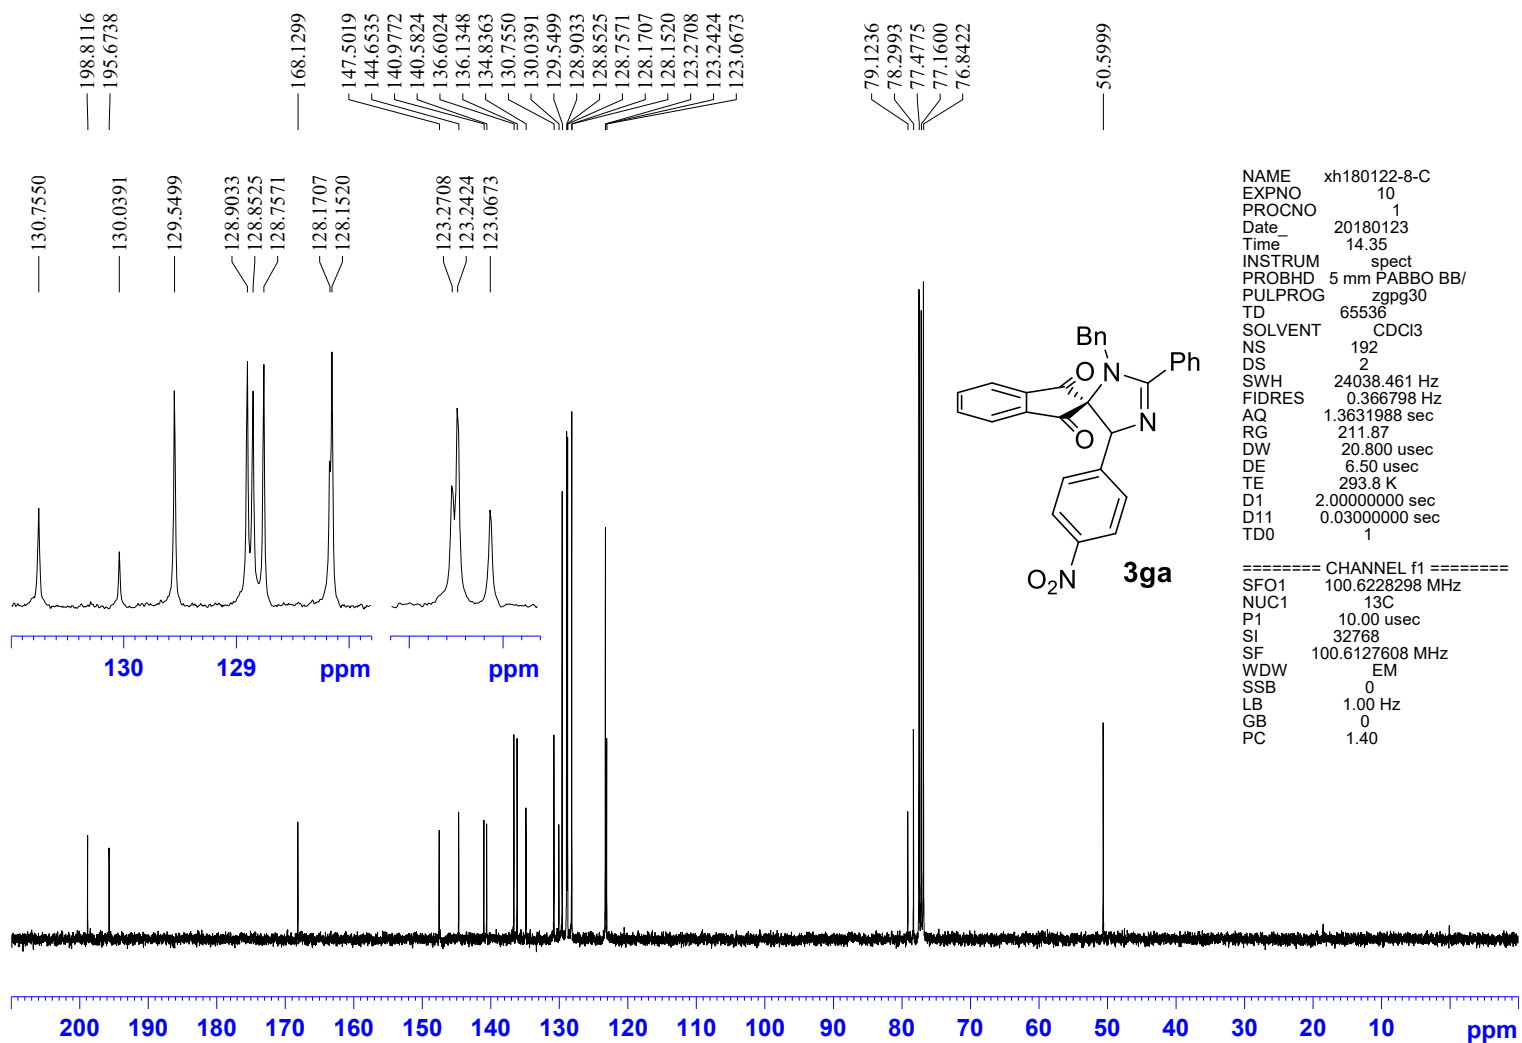

Figure S16. <sup>13</sup>C NMR (101 MHz, CDCl<sub>3</sub>) of compound 3ga



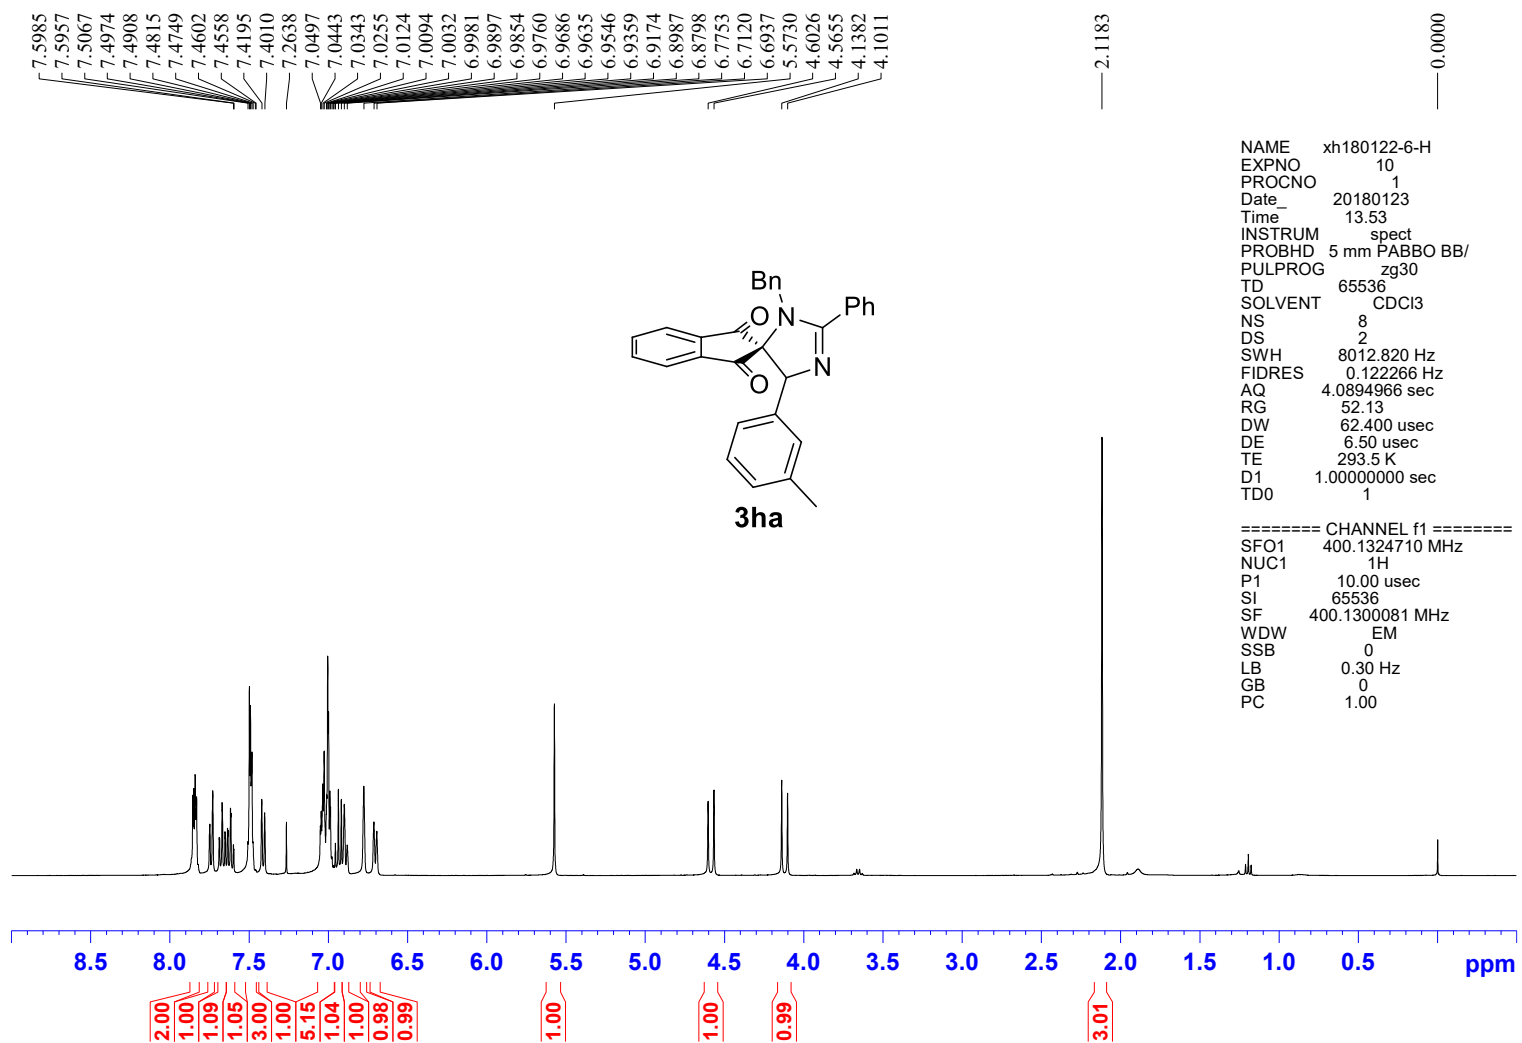

Figure S17. <sup>1</sup>H NMR (400 MHz, CDCl<sub>3</sub>) of compound 3ha

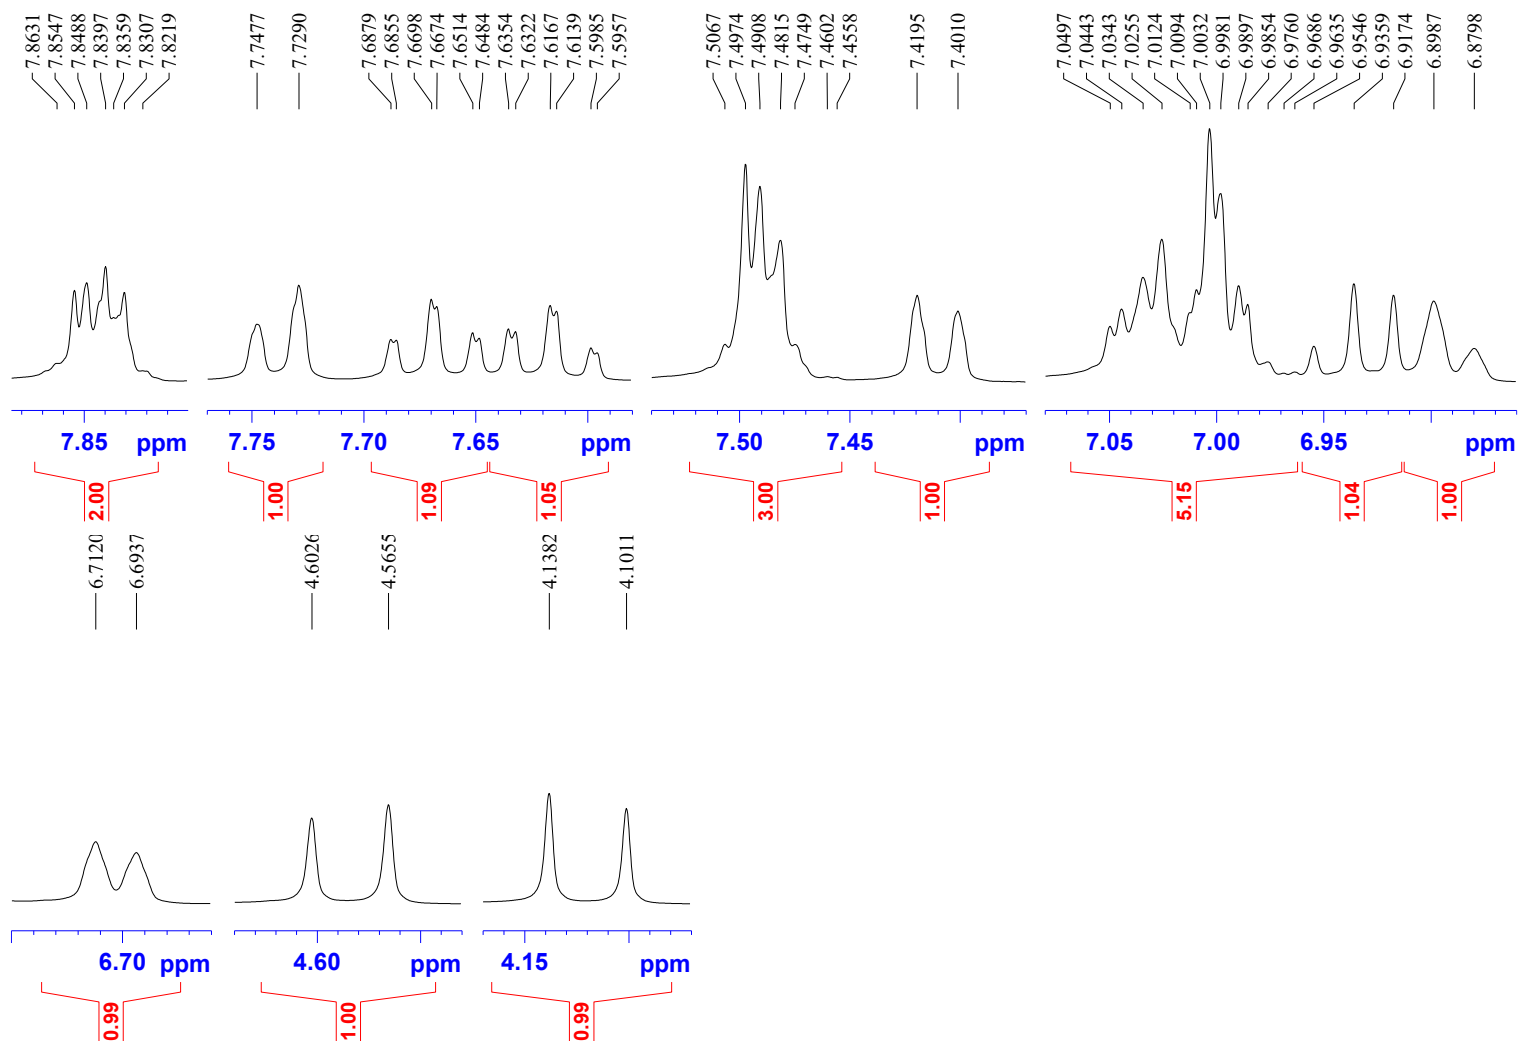

Figure S18. Expanded <sup>1</sup>H NMR (400 MHz, CDCl<sub>3</sub>) of compound 3ha

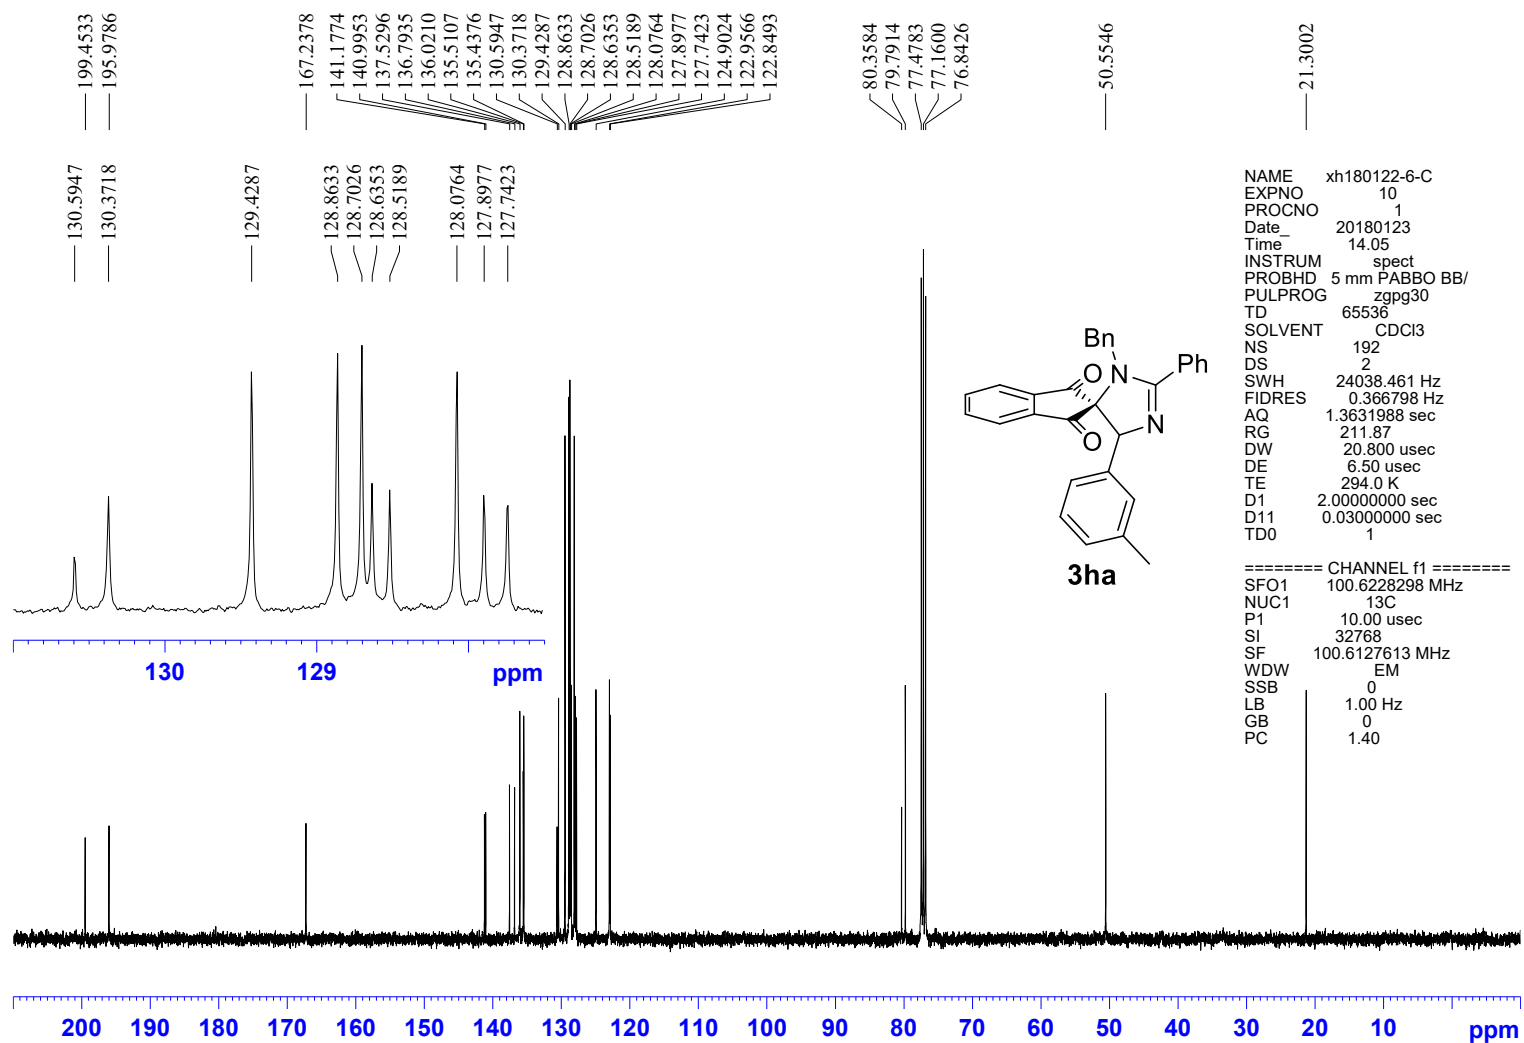

Figure S19. <sup>13</sup>C NMR (101 MHz, CDCl<sub>3</sub>) of compound 3ha

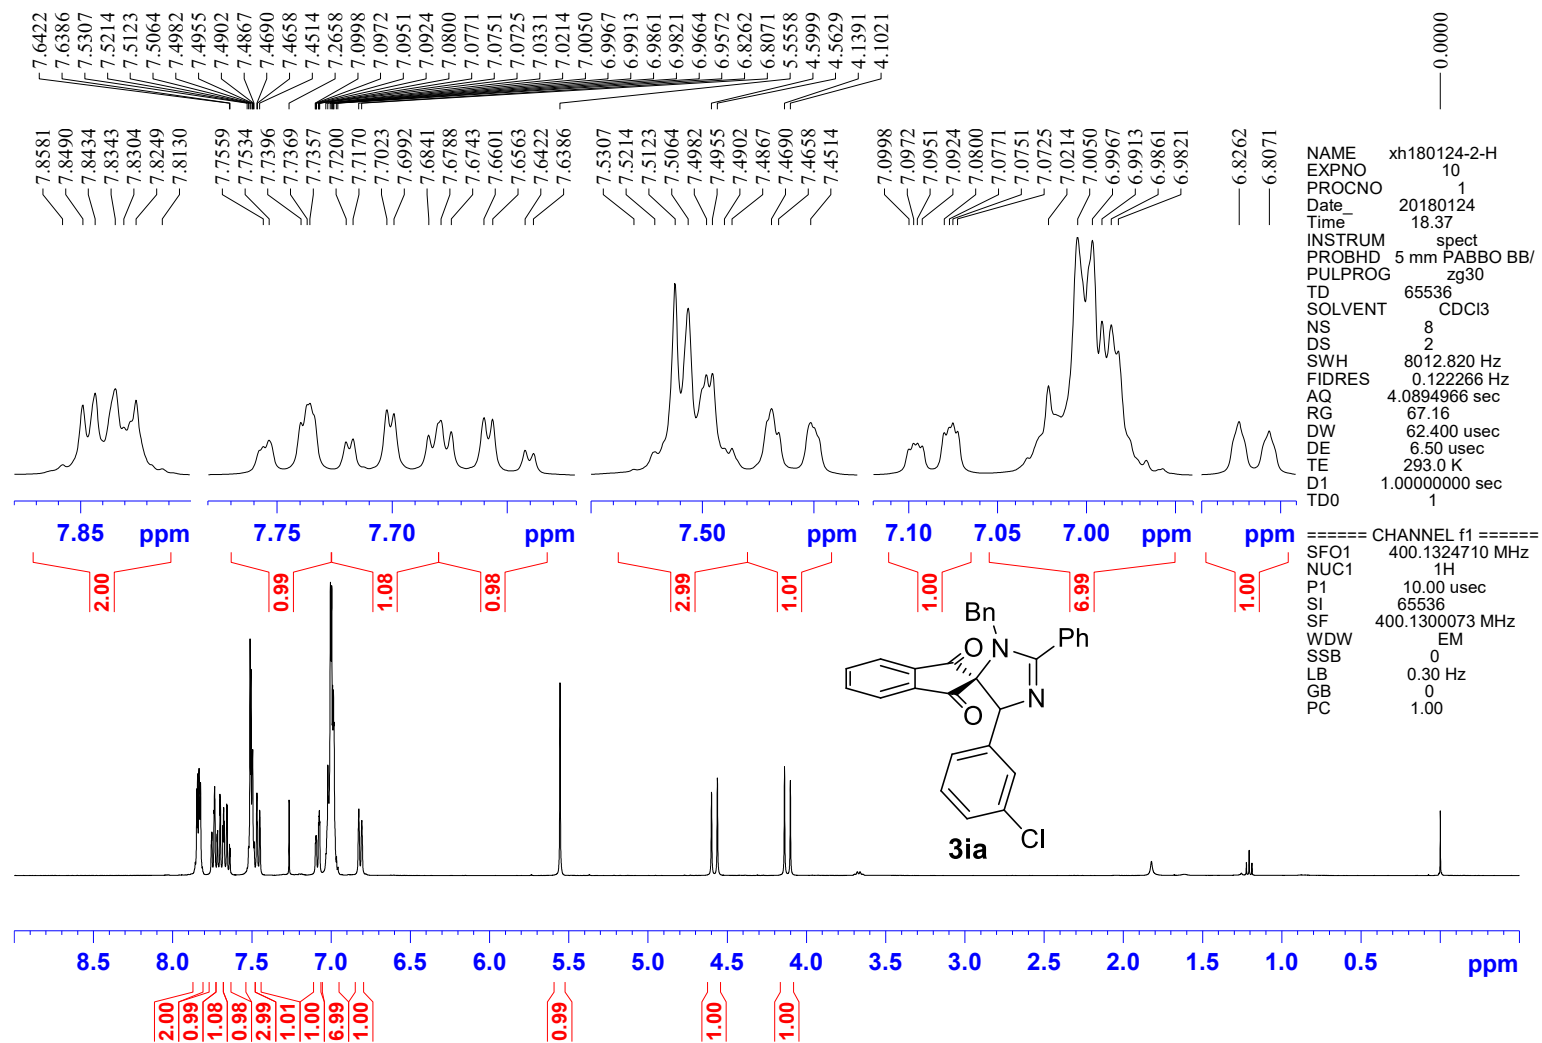

Figure S20.  $^1\text{H}$  NMR (400 MHz,  $\text{CDCl}_3$ ) of compound 3ia

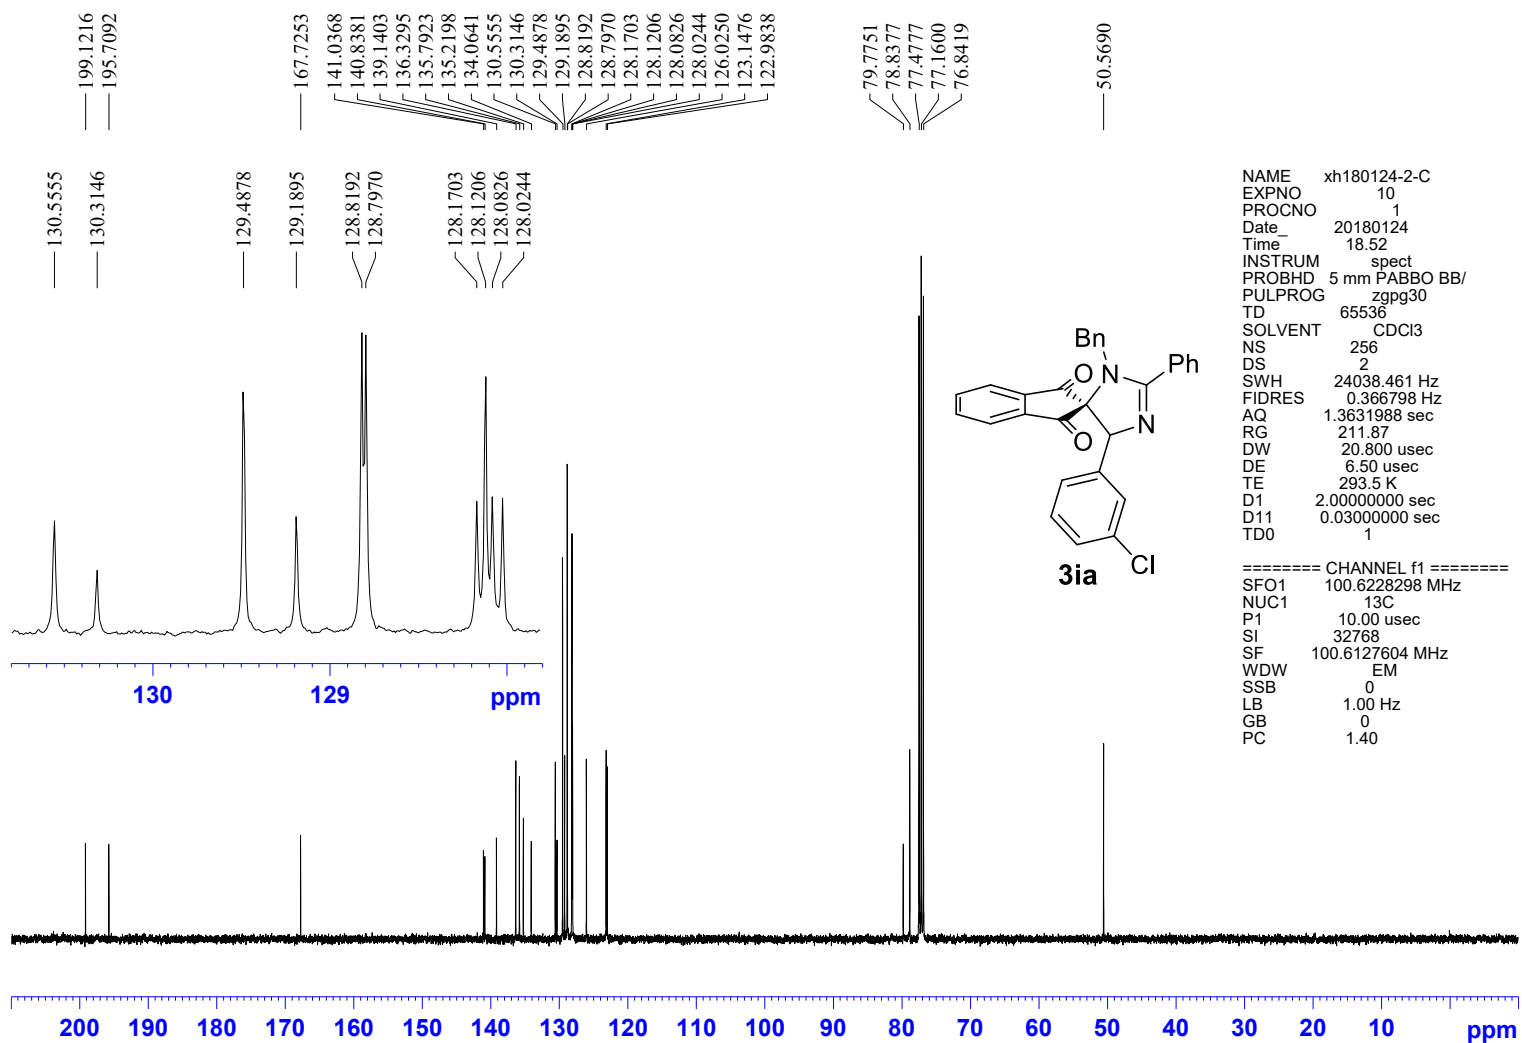

Figure S21. <sup>13</sup>C NMR (101 MHz, CDCl<sub>3</sub>) of compound **3ia**

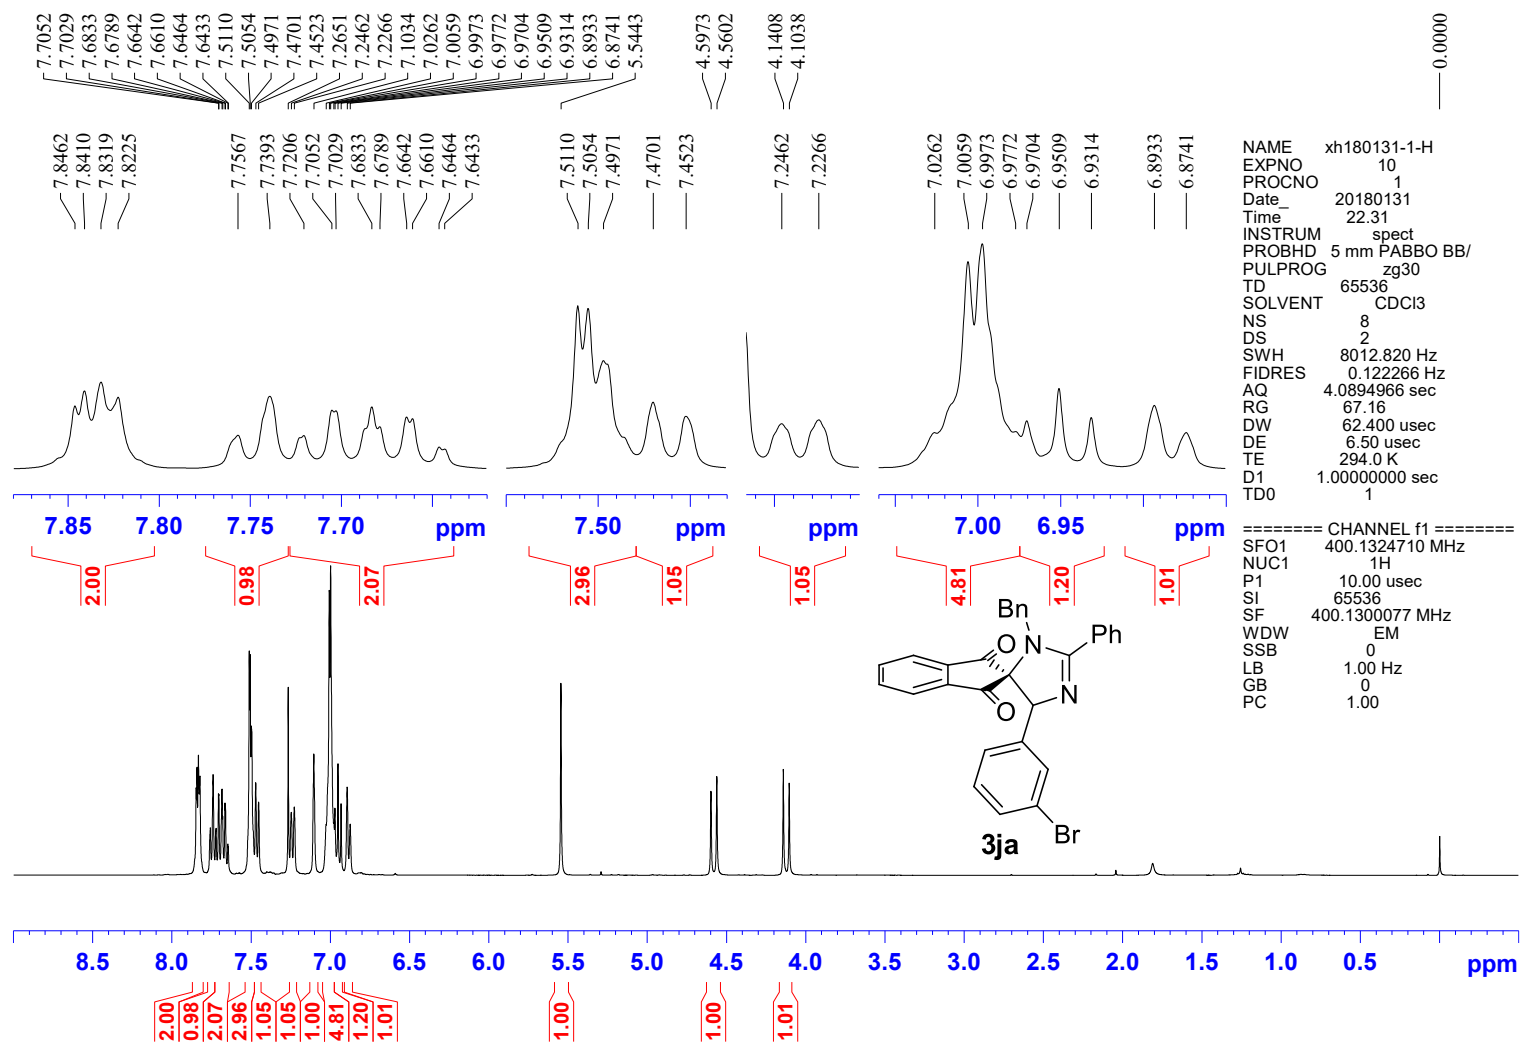

Figure S22. <sup>1</sup>H NMR (400 MHz, CDCl<sub>3</sub>) of compound 3ja

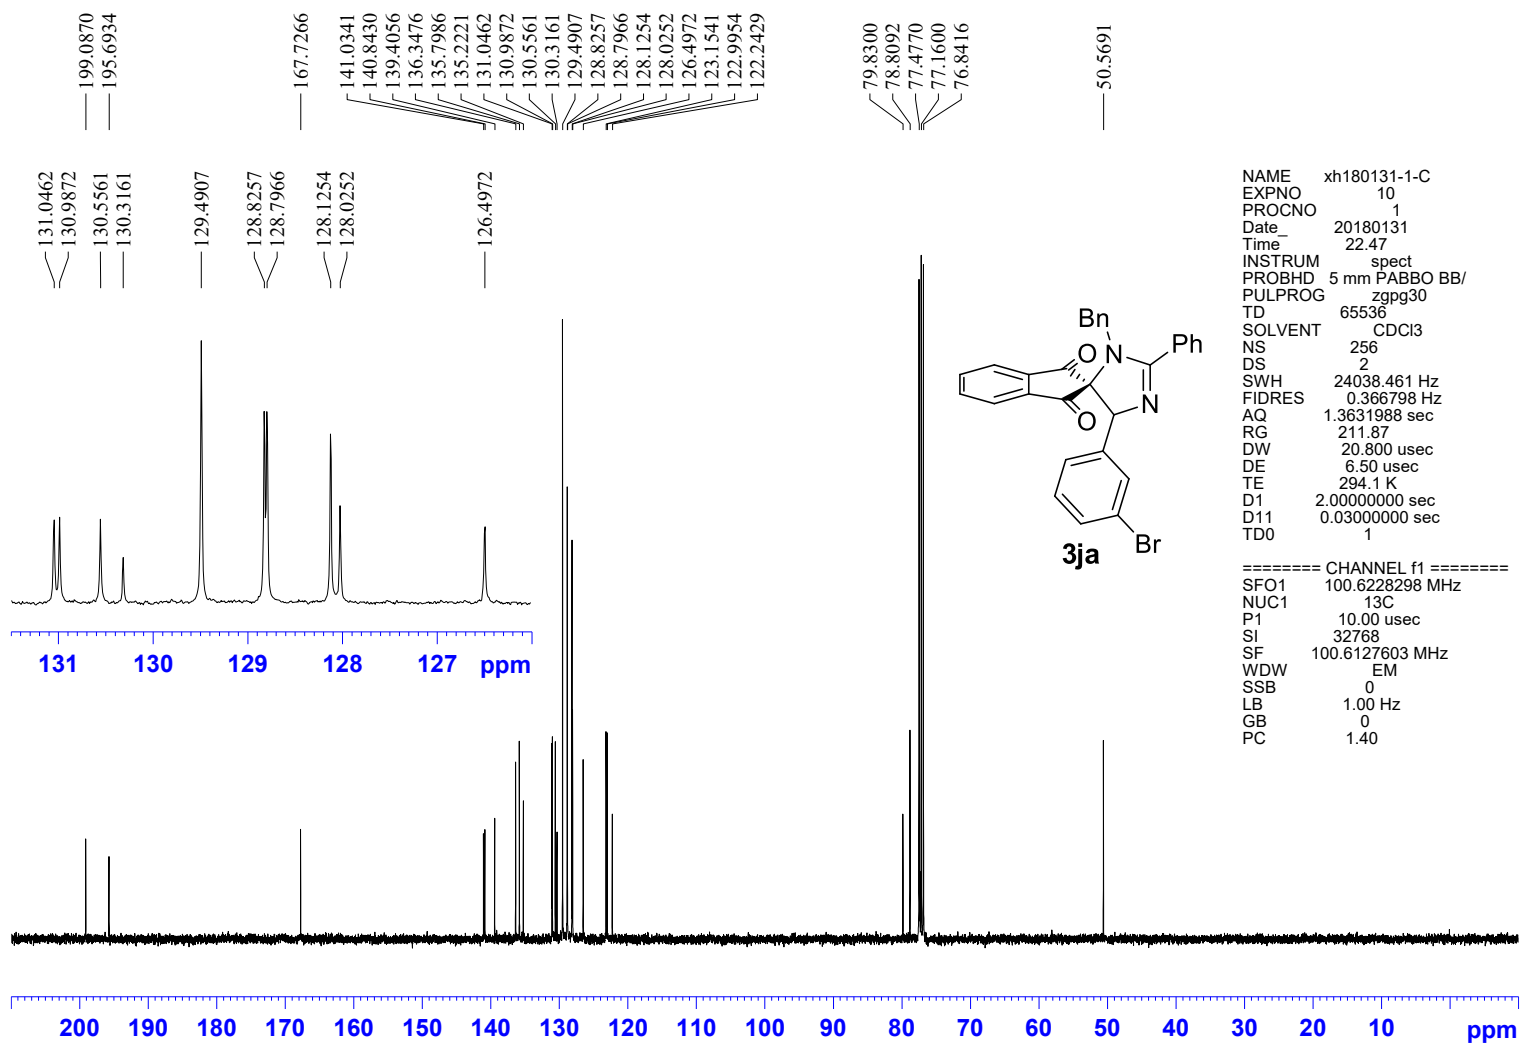

Figure S23. <sup>13</sup>C NMR (101 MHz, CDCl<sub>3</sub>) of compound 3ja

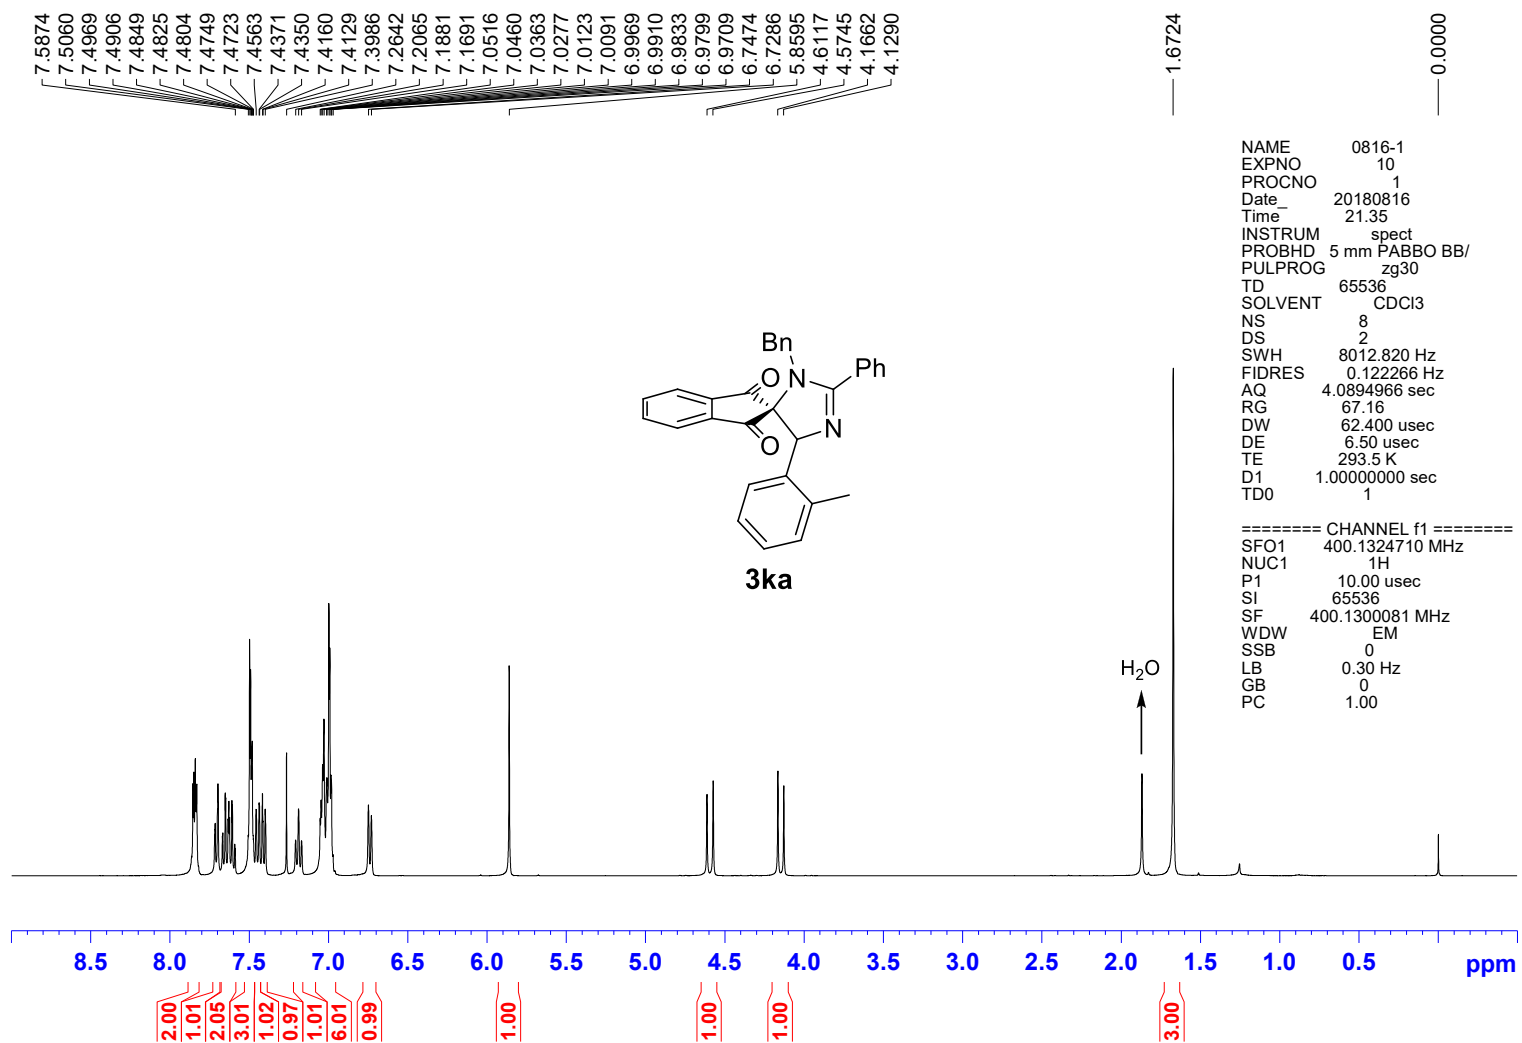

Figure S24. <sup>1</sup>H NMR (400 MHz, CDCl<sub>3</sub>) of compound 3ka



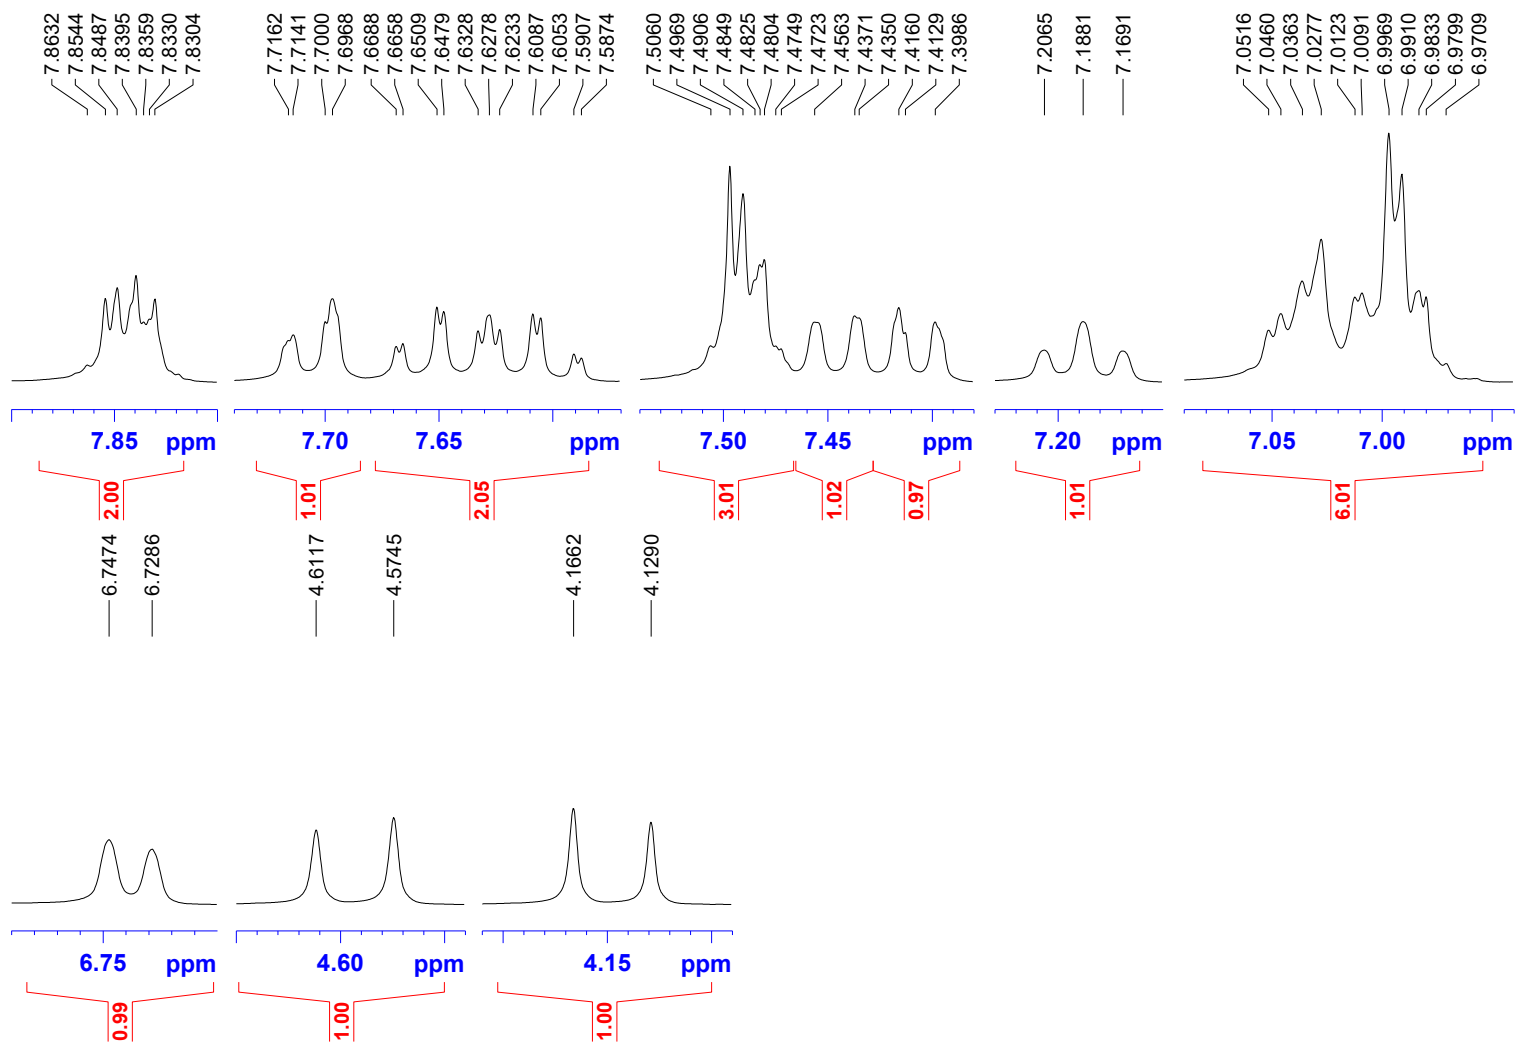

Figure S25. Expanded <sup>1</sup>H NMR (400 MHz, CDCl<sub>3</sub>) of compound 3ka

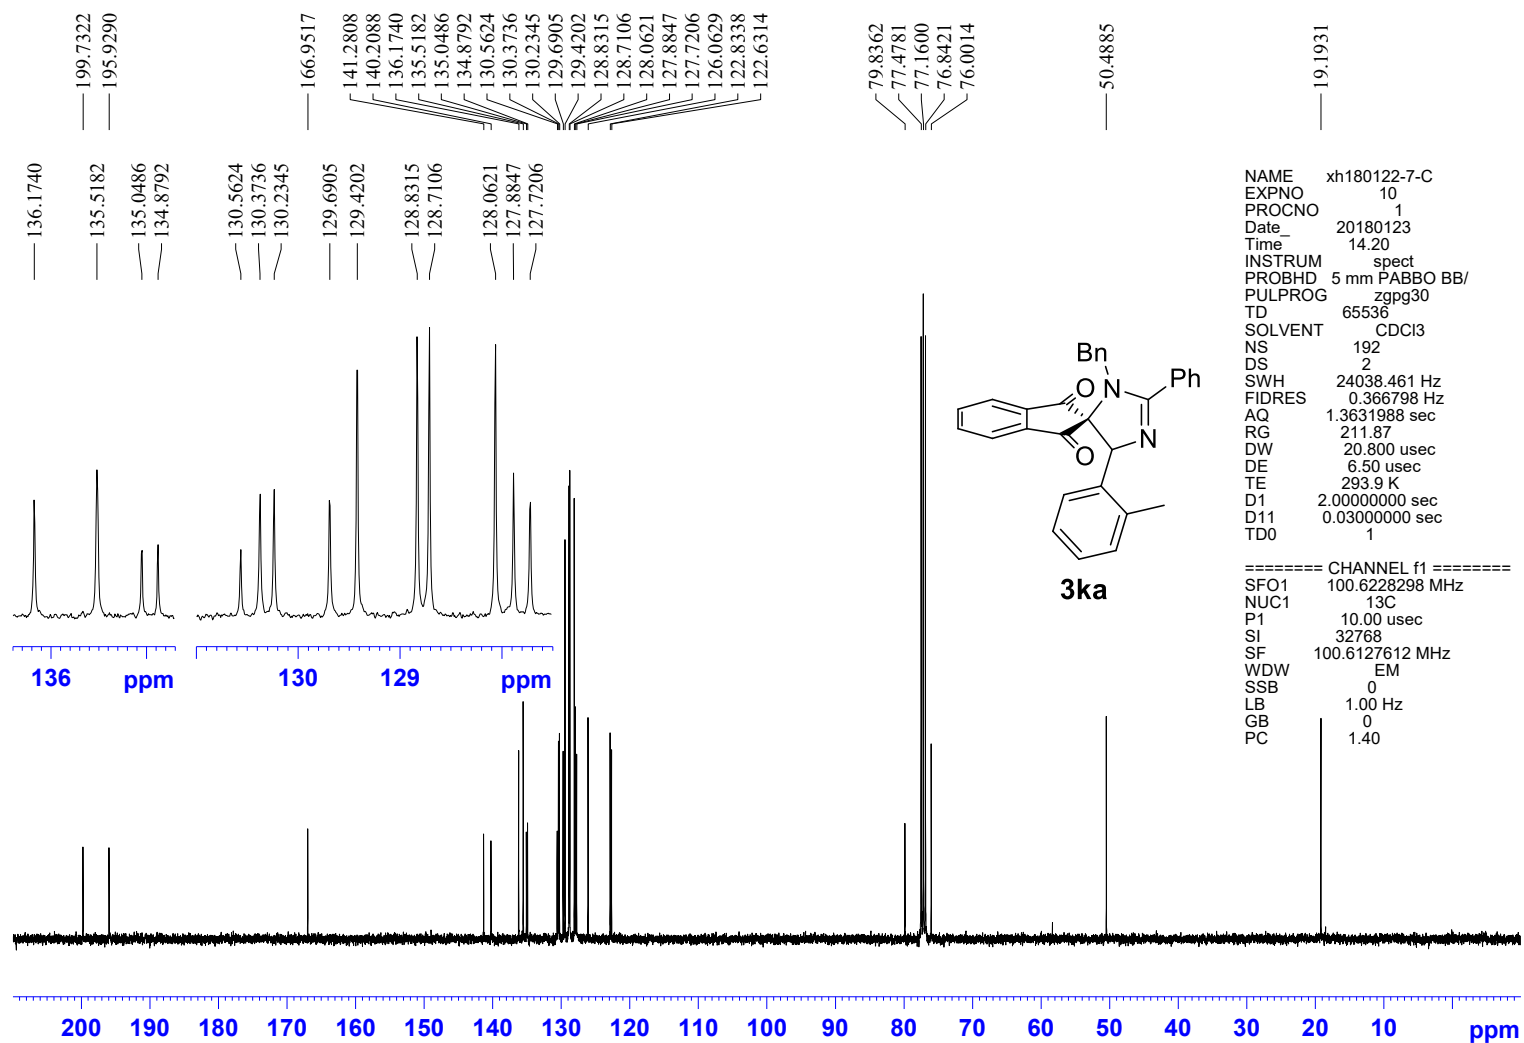

Figure S26. <sup>13</sup>C NMR (101 MHz, CDCl<sub>3</sub>) of compound 3ka

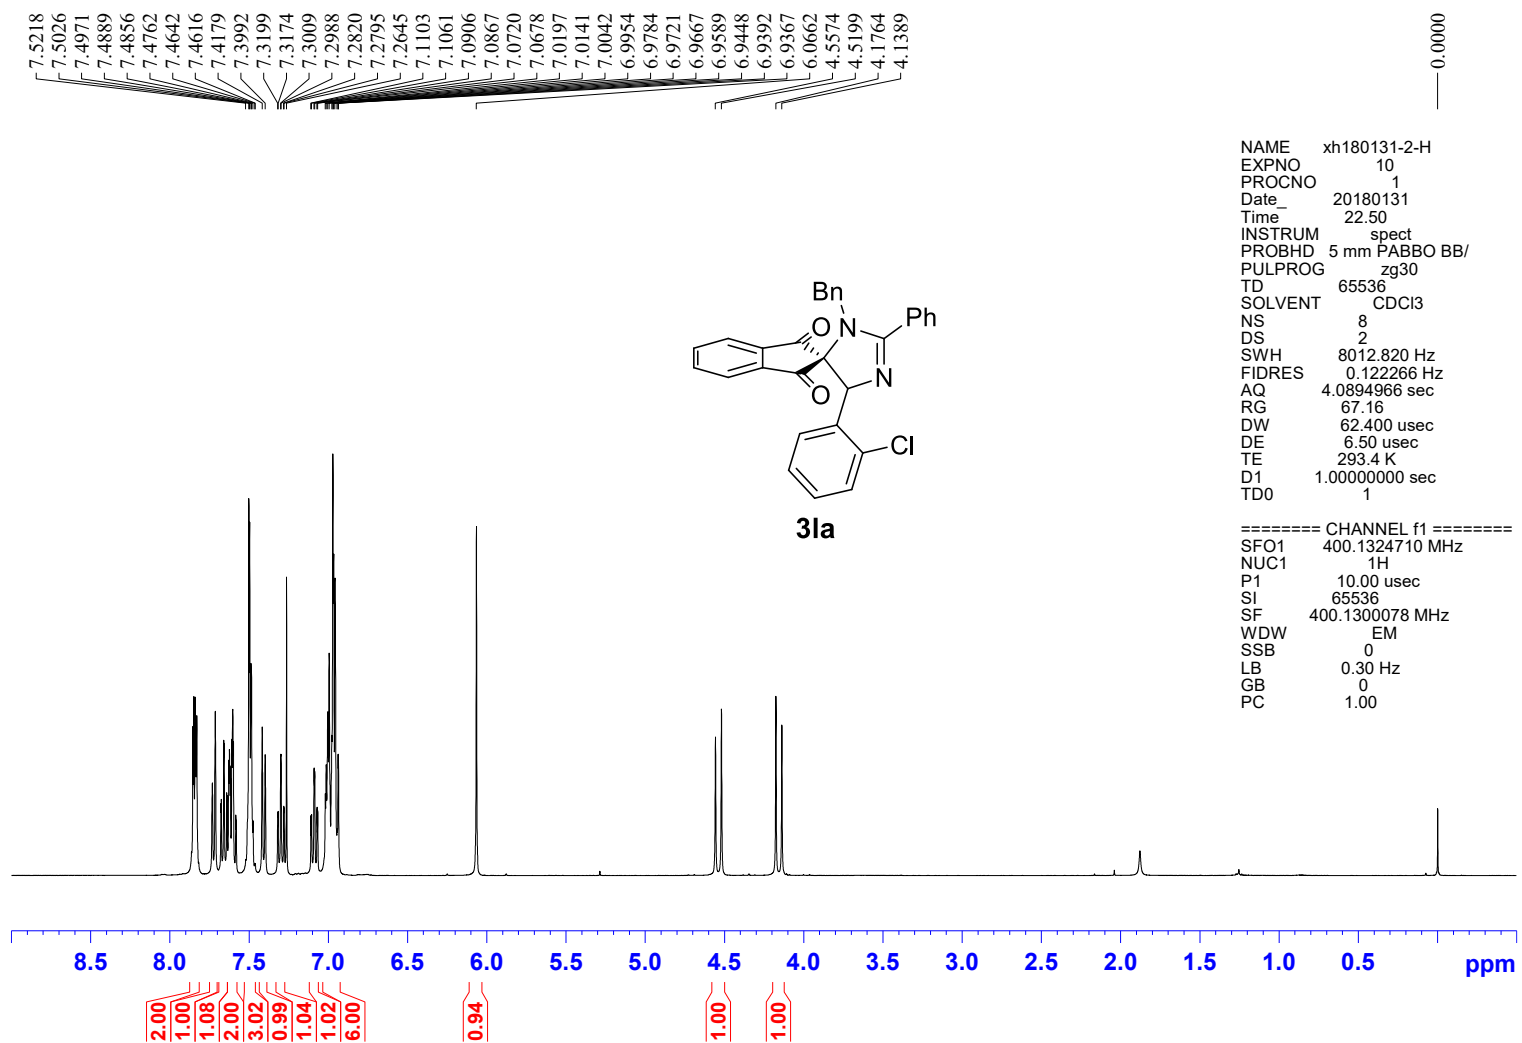

Figure S27.  $^1\text{H}$  NMR (400 MHz,  $\text{CDCl}_3$ ) of compound 3la

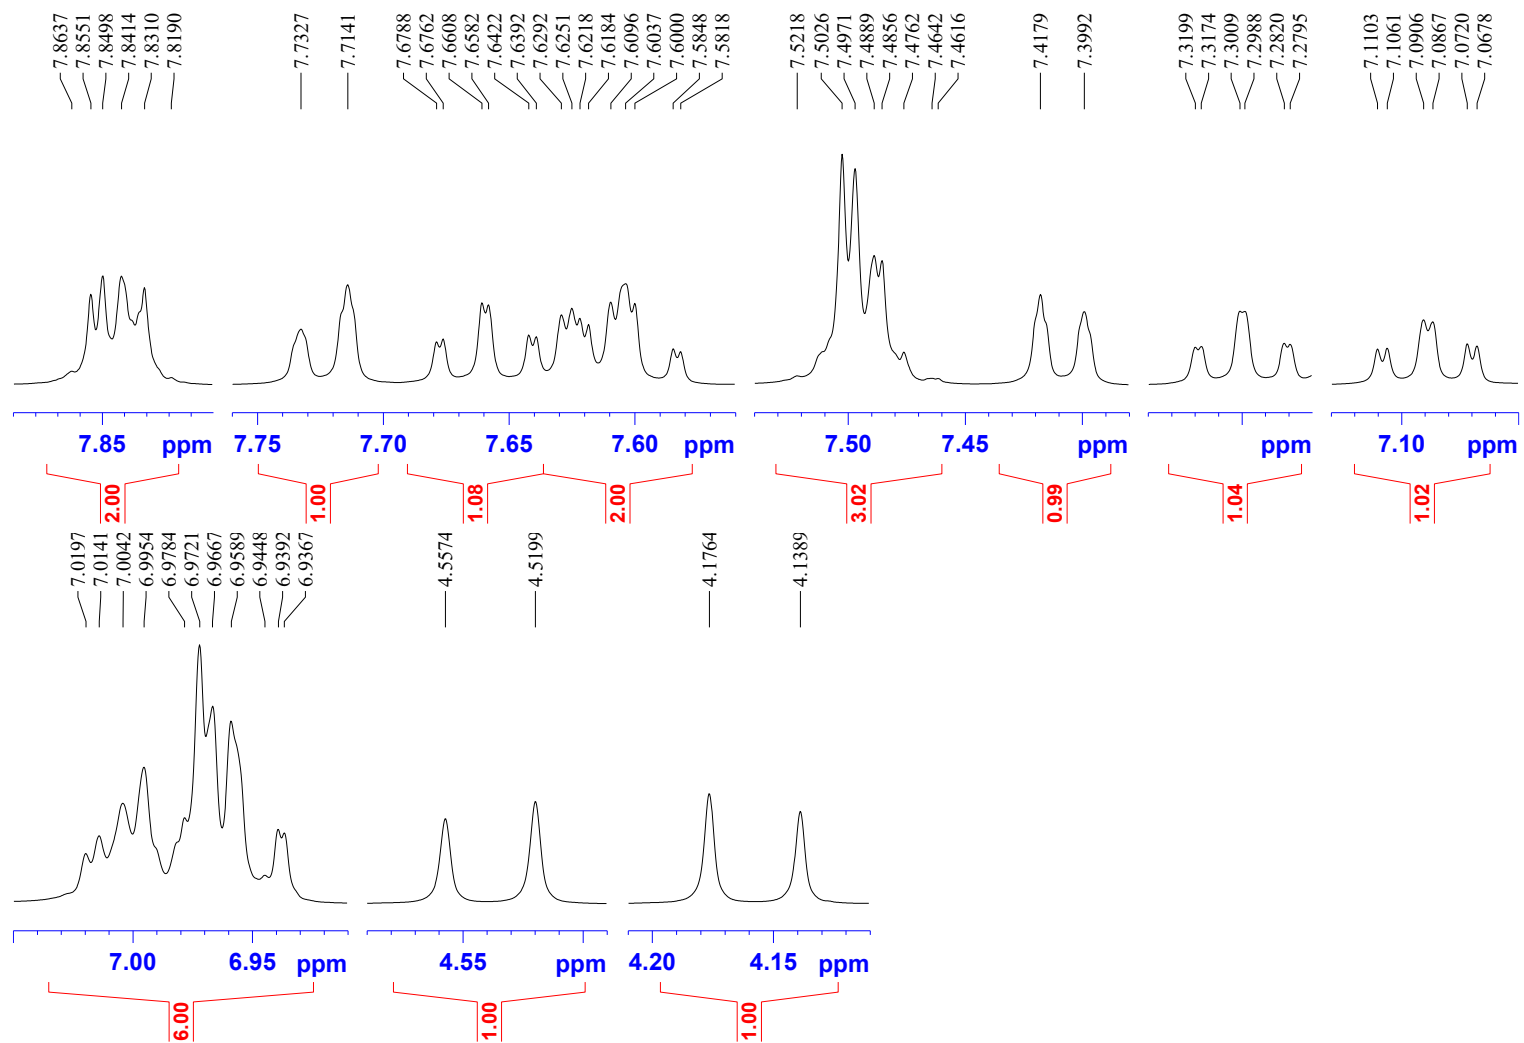

Figure S28. Expanded <sup>1</sup>H NMR (400 MHz, CDCl<sub>3</sub>) of compound 3la

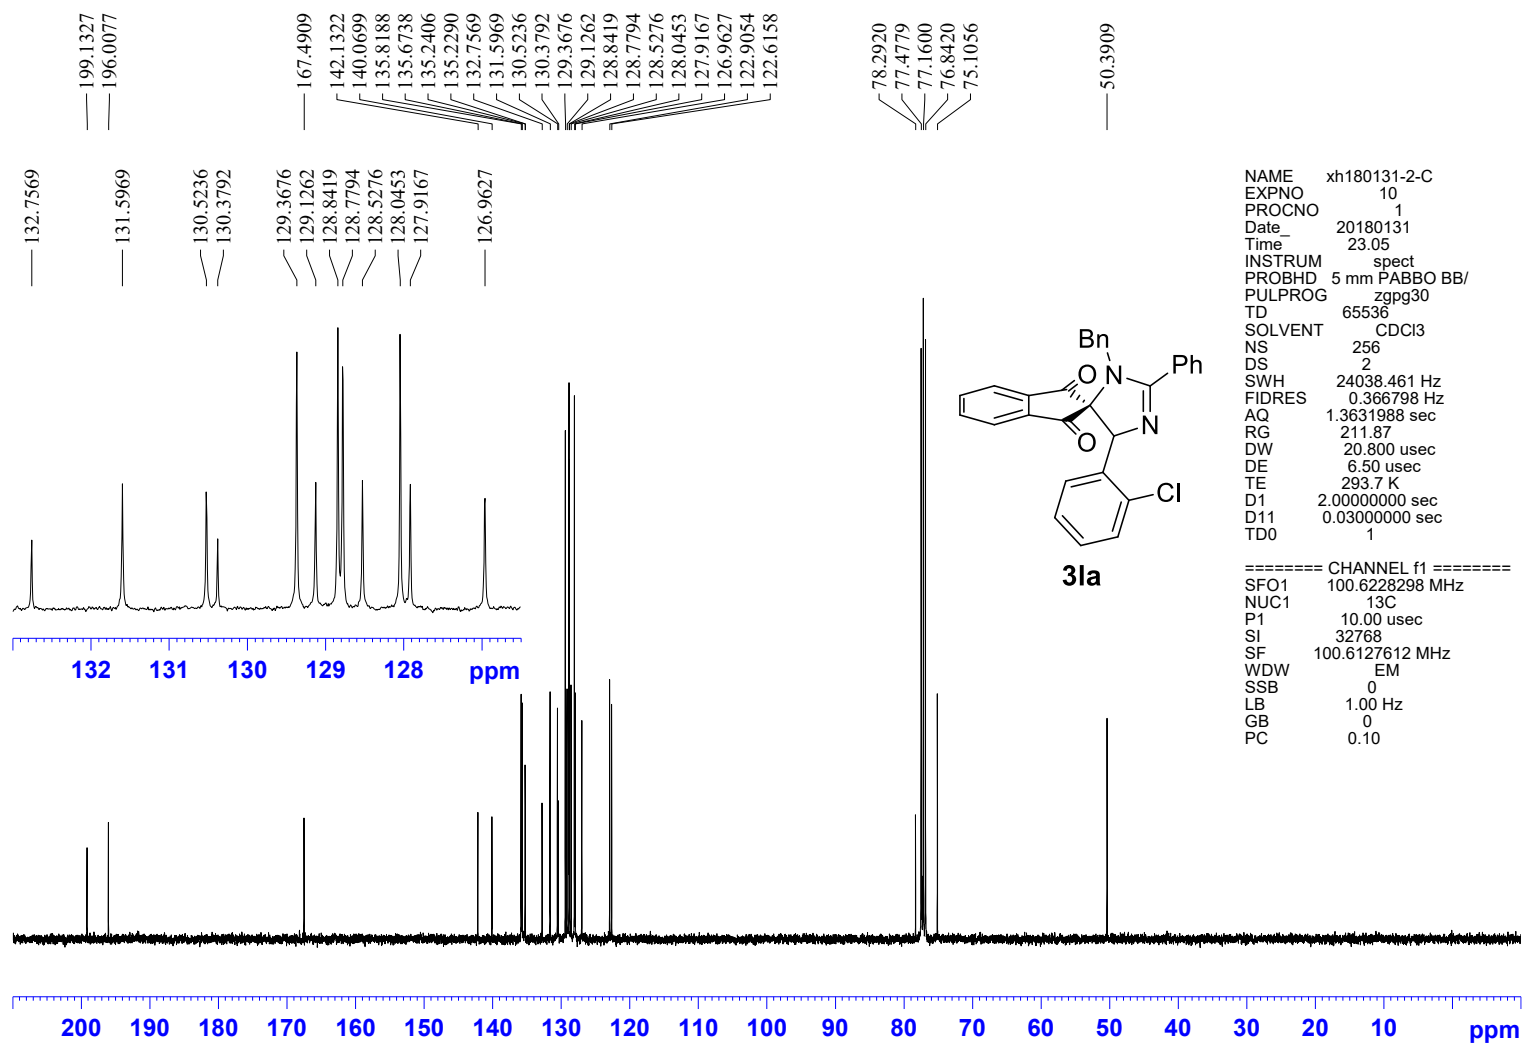

Figure S29. <sup>13</sup>C NMR (101 MHz, CDCl<sub>3</sub>) of compound 3la

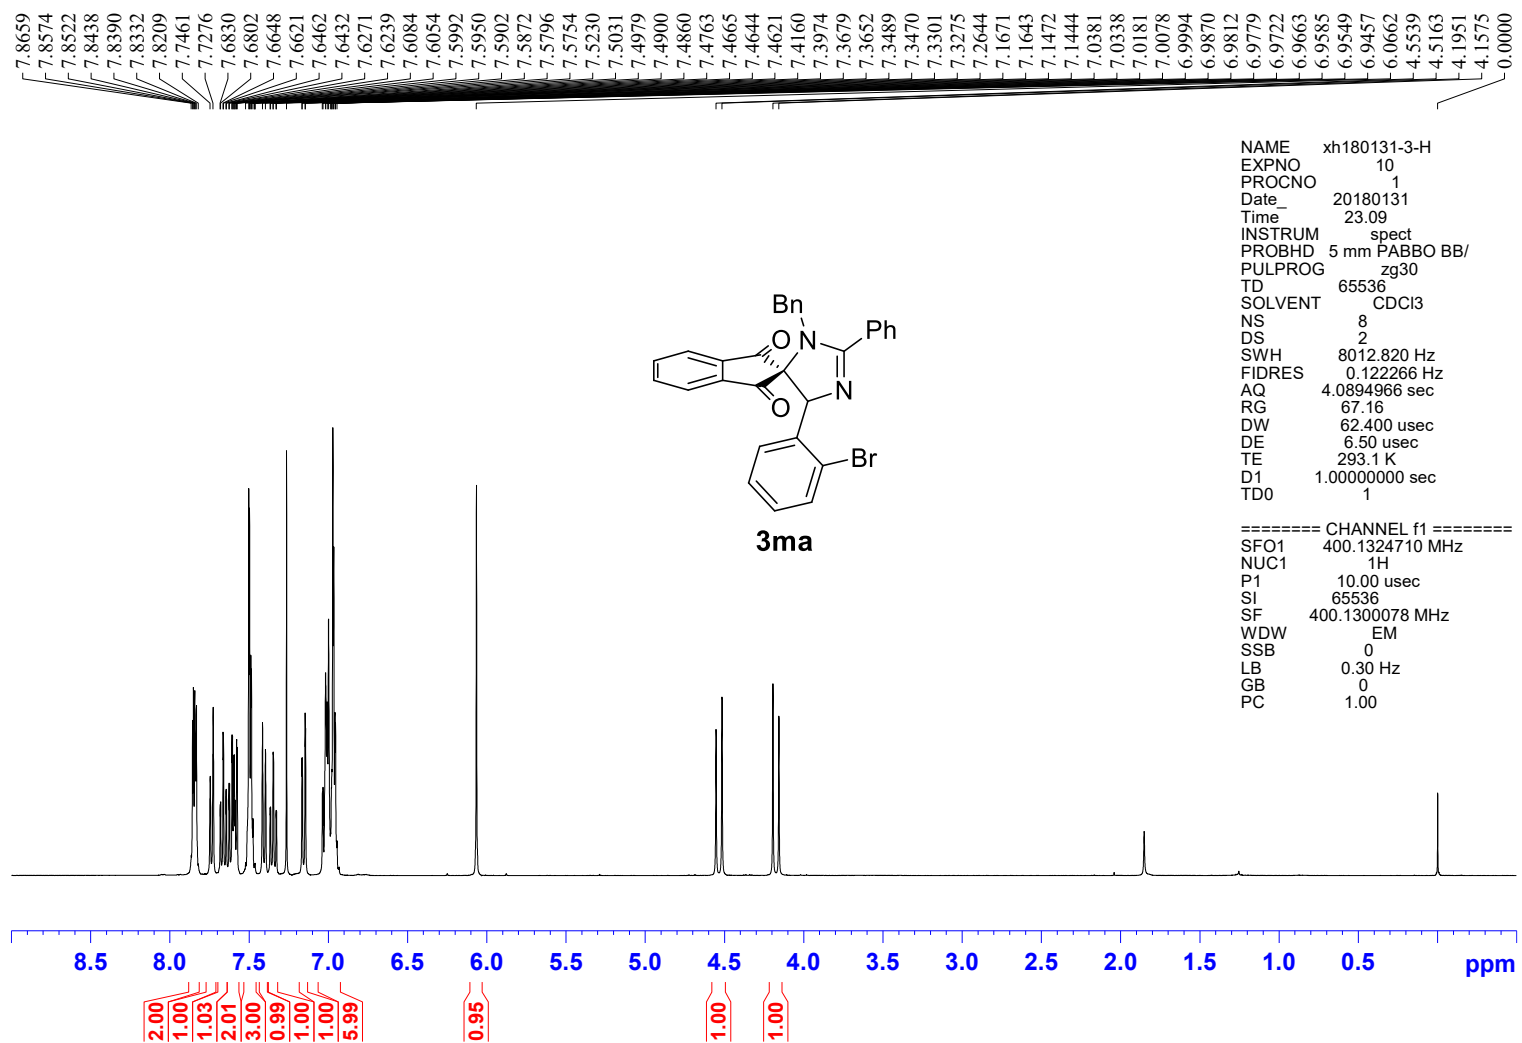

Figure S30. <sup>1</sup>H NMR (400 MHz, CDCl<sub>3</sub>) of compound 3ma

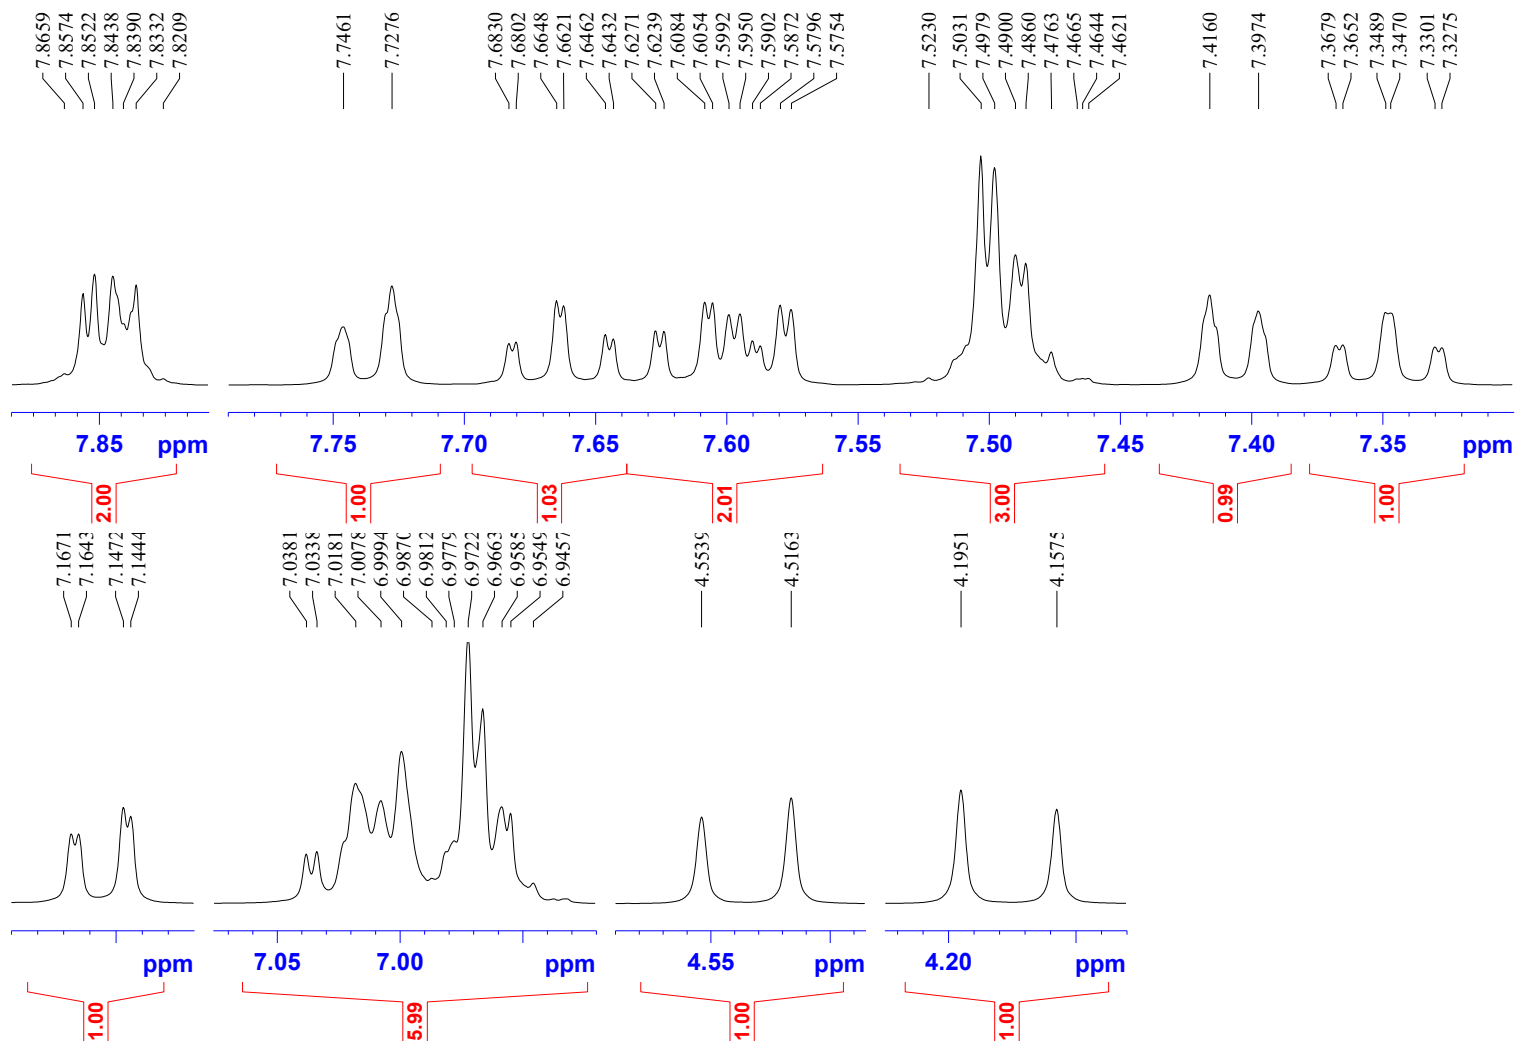

Figure S31. Expanded <sup>1</sup>H NMR (400 MHz, CDCl<sub>3</sub>) of compound 3ma





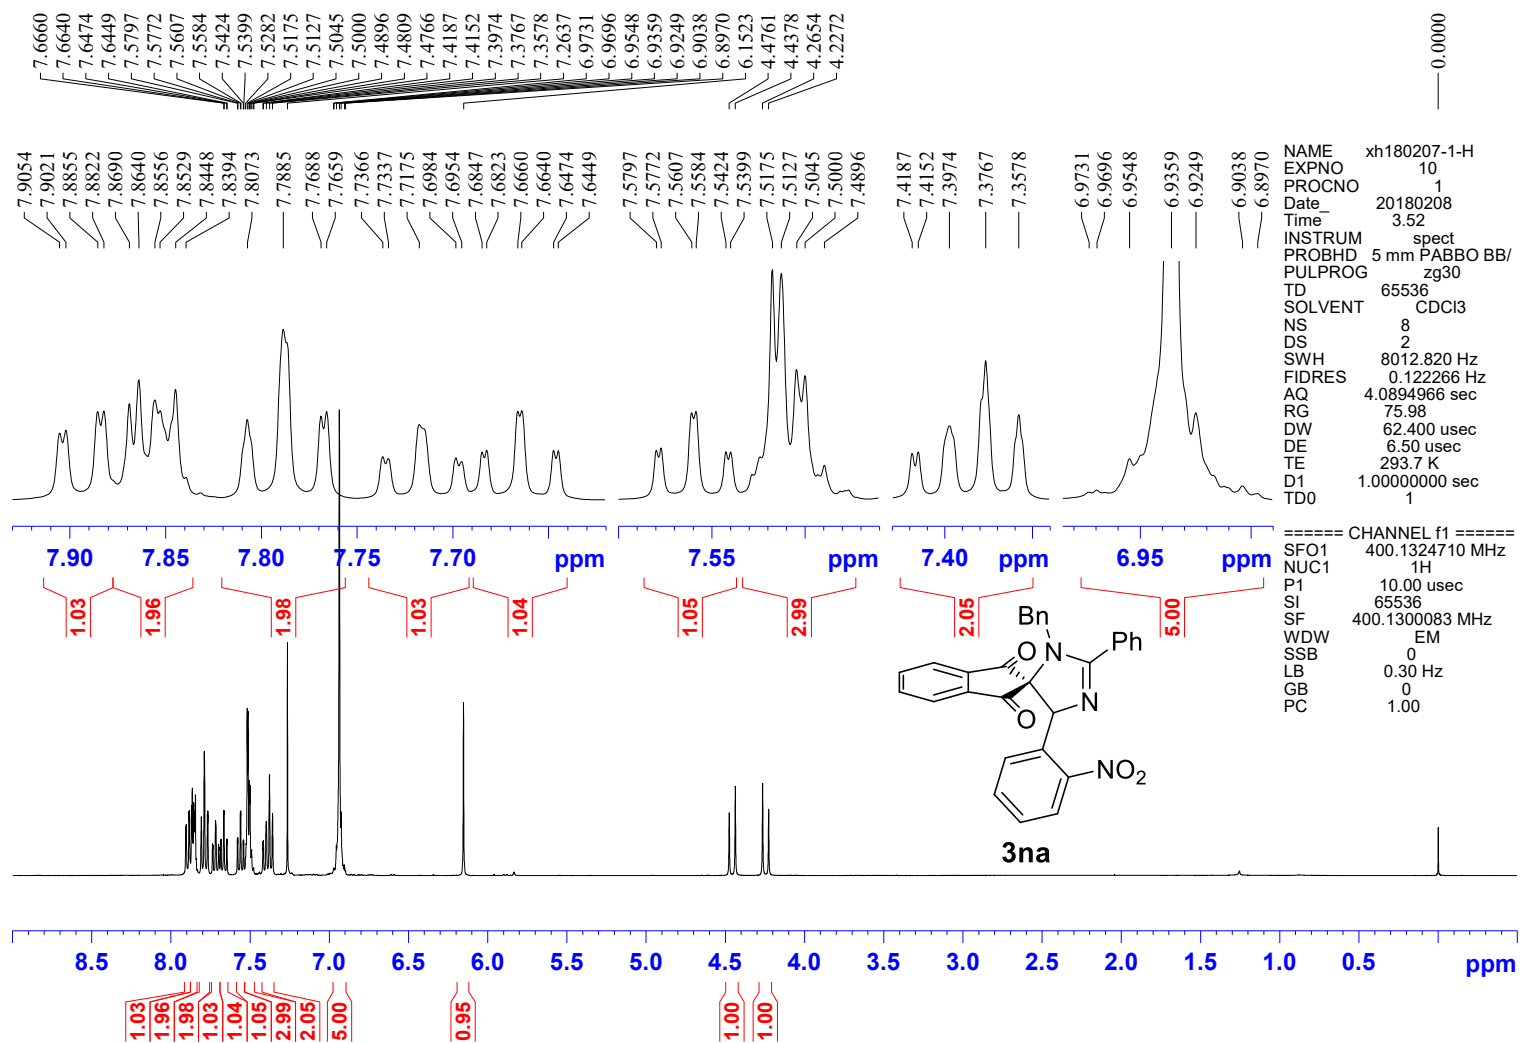

Figure S33. <sup>1</sup>H NMR (400 MHz, CDCl<sub>3</sub>) of compound 3na

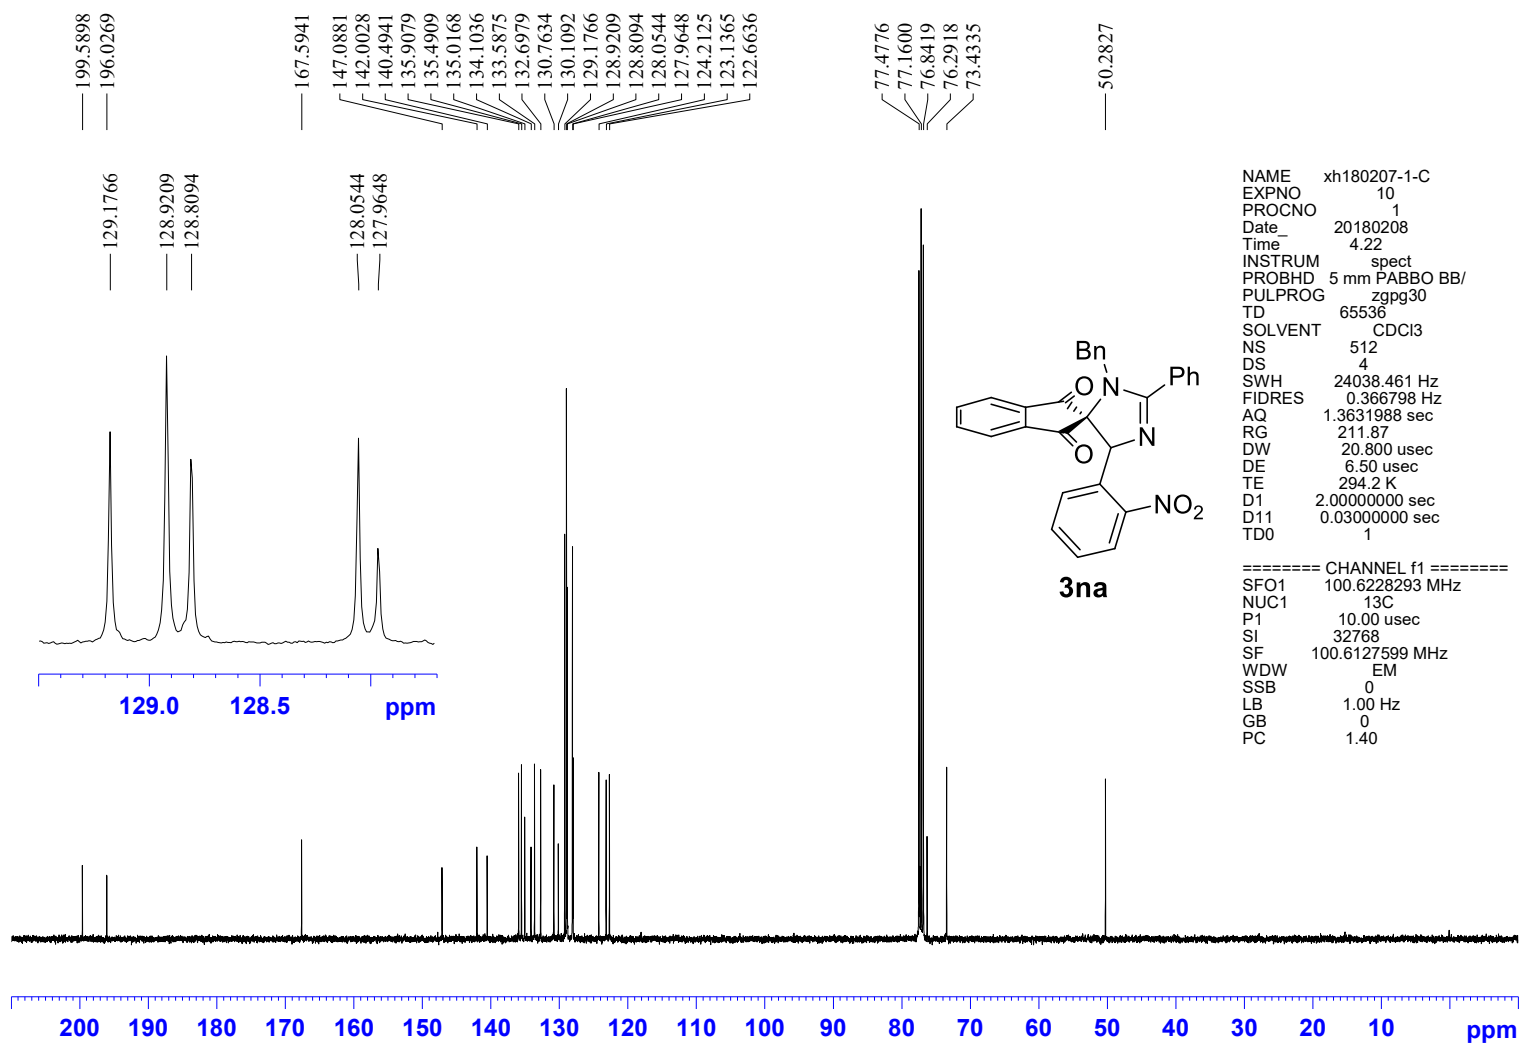

Figure S34. <sup>13</sup>C NMR (101 MHz, CDCl<sub>3</sub>) of compound 3na

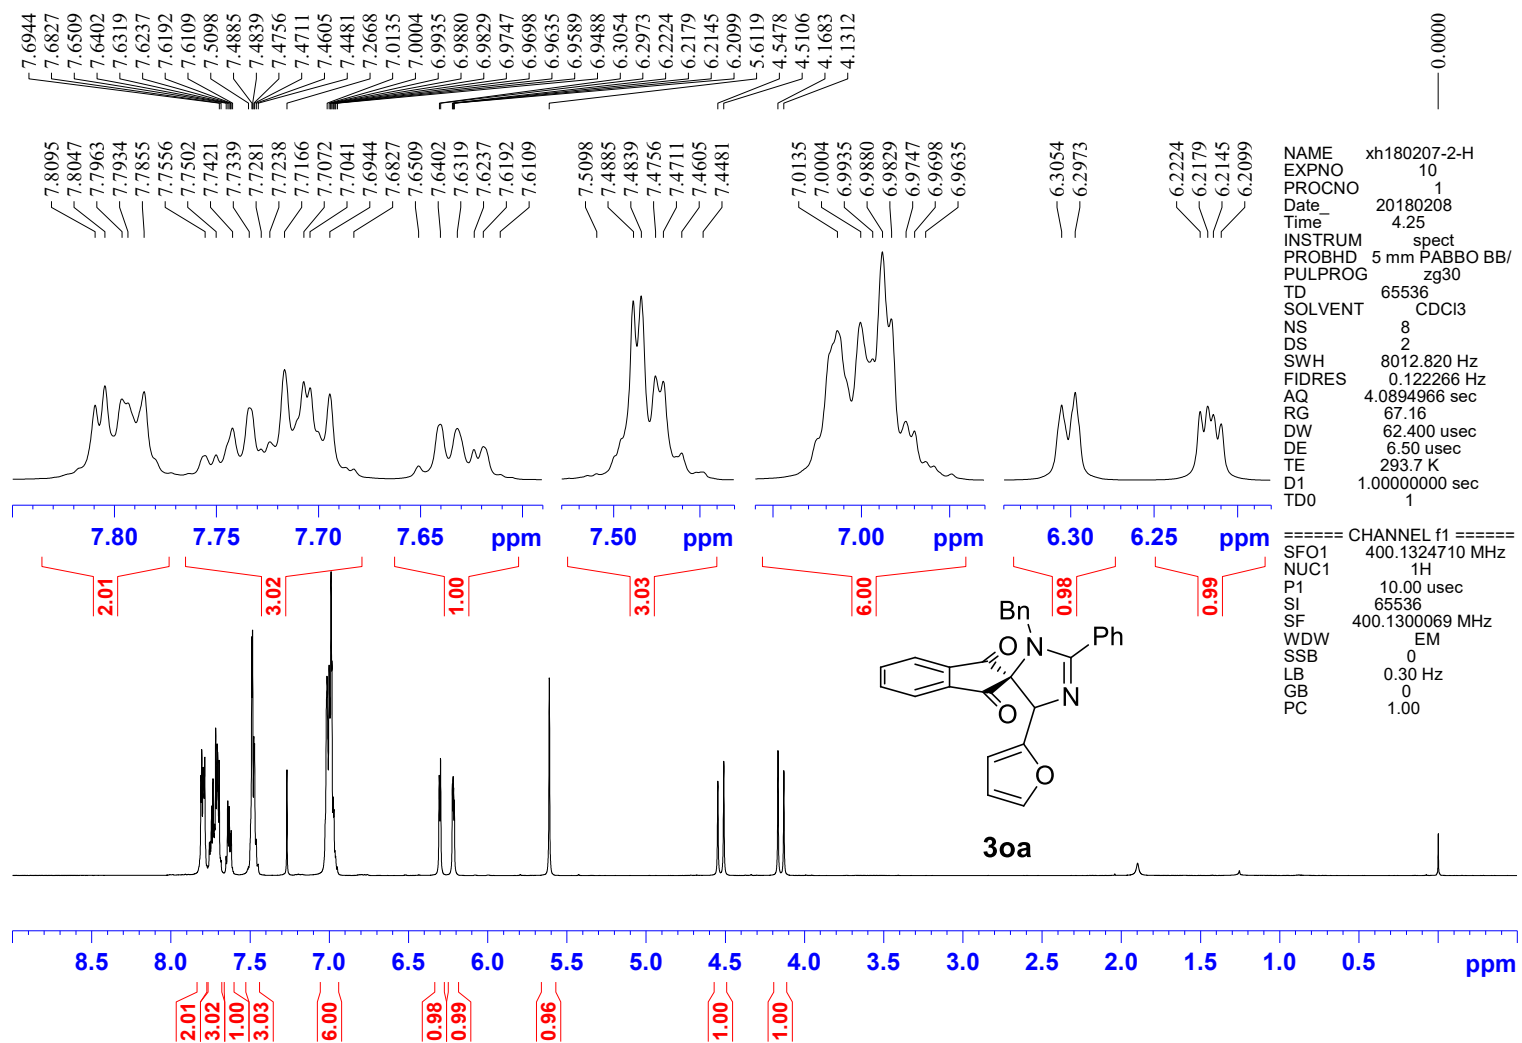

Figure S35. <sup>1</sup>H NMR (400 MHz, CDCl<sub>3</sub>) of compound 30a

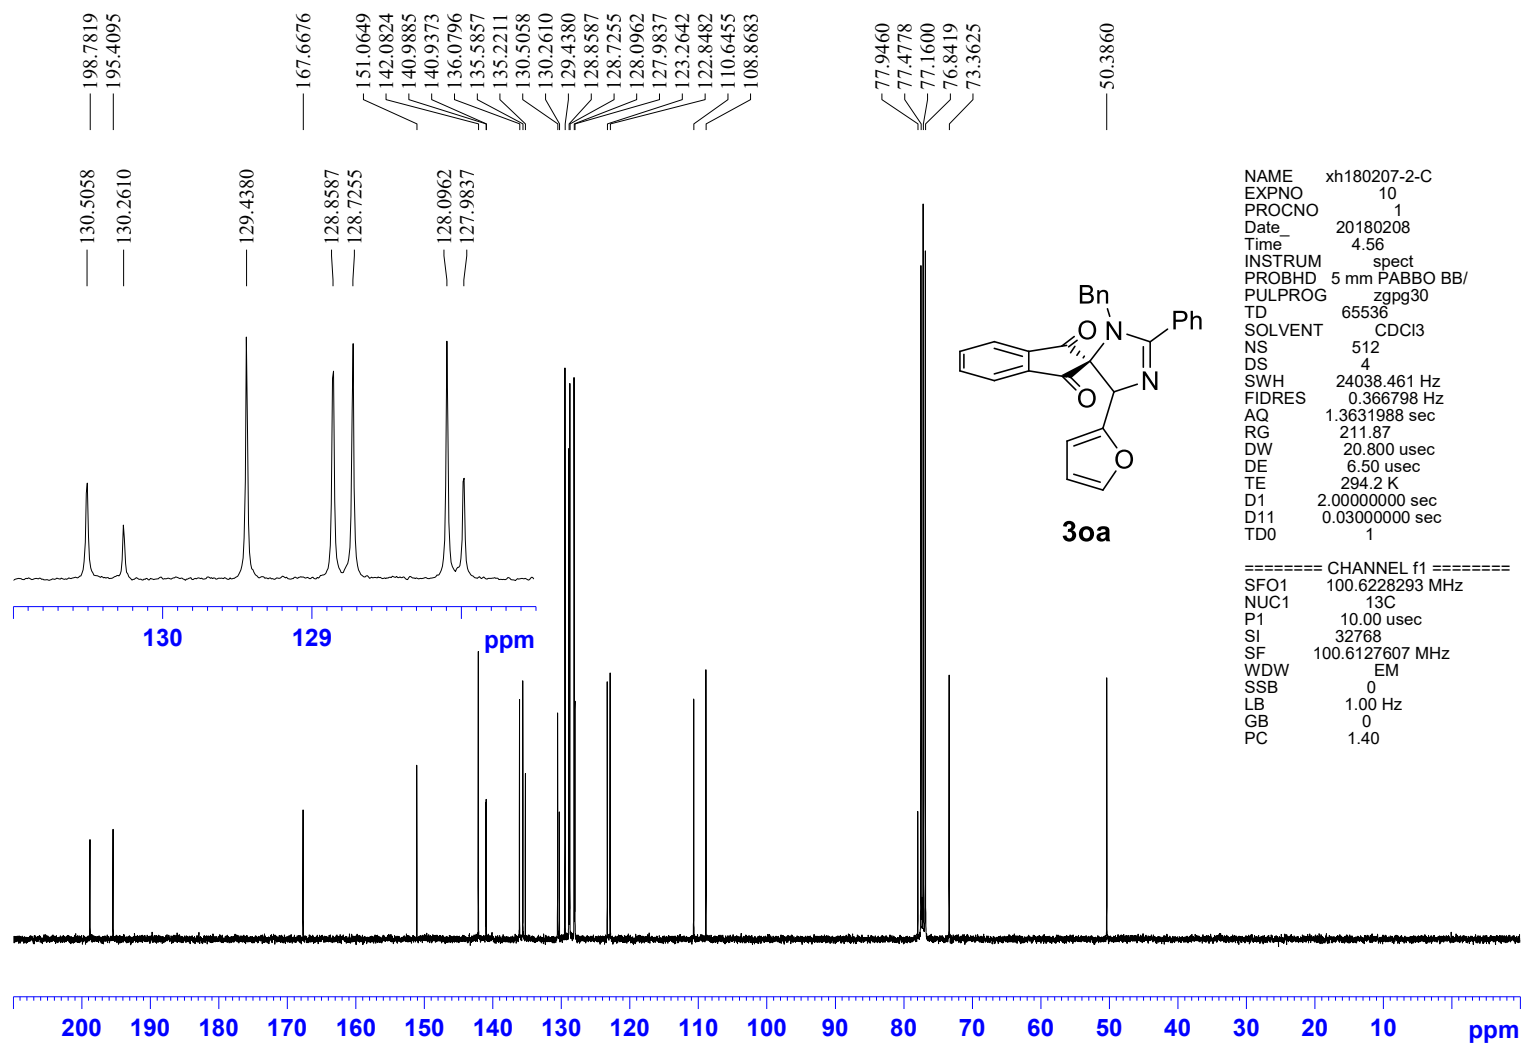

Figure S36. <sup>13</sup>C NMR (101 MHz, CDCl<sub>3</sub>) of compound 30a

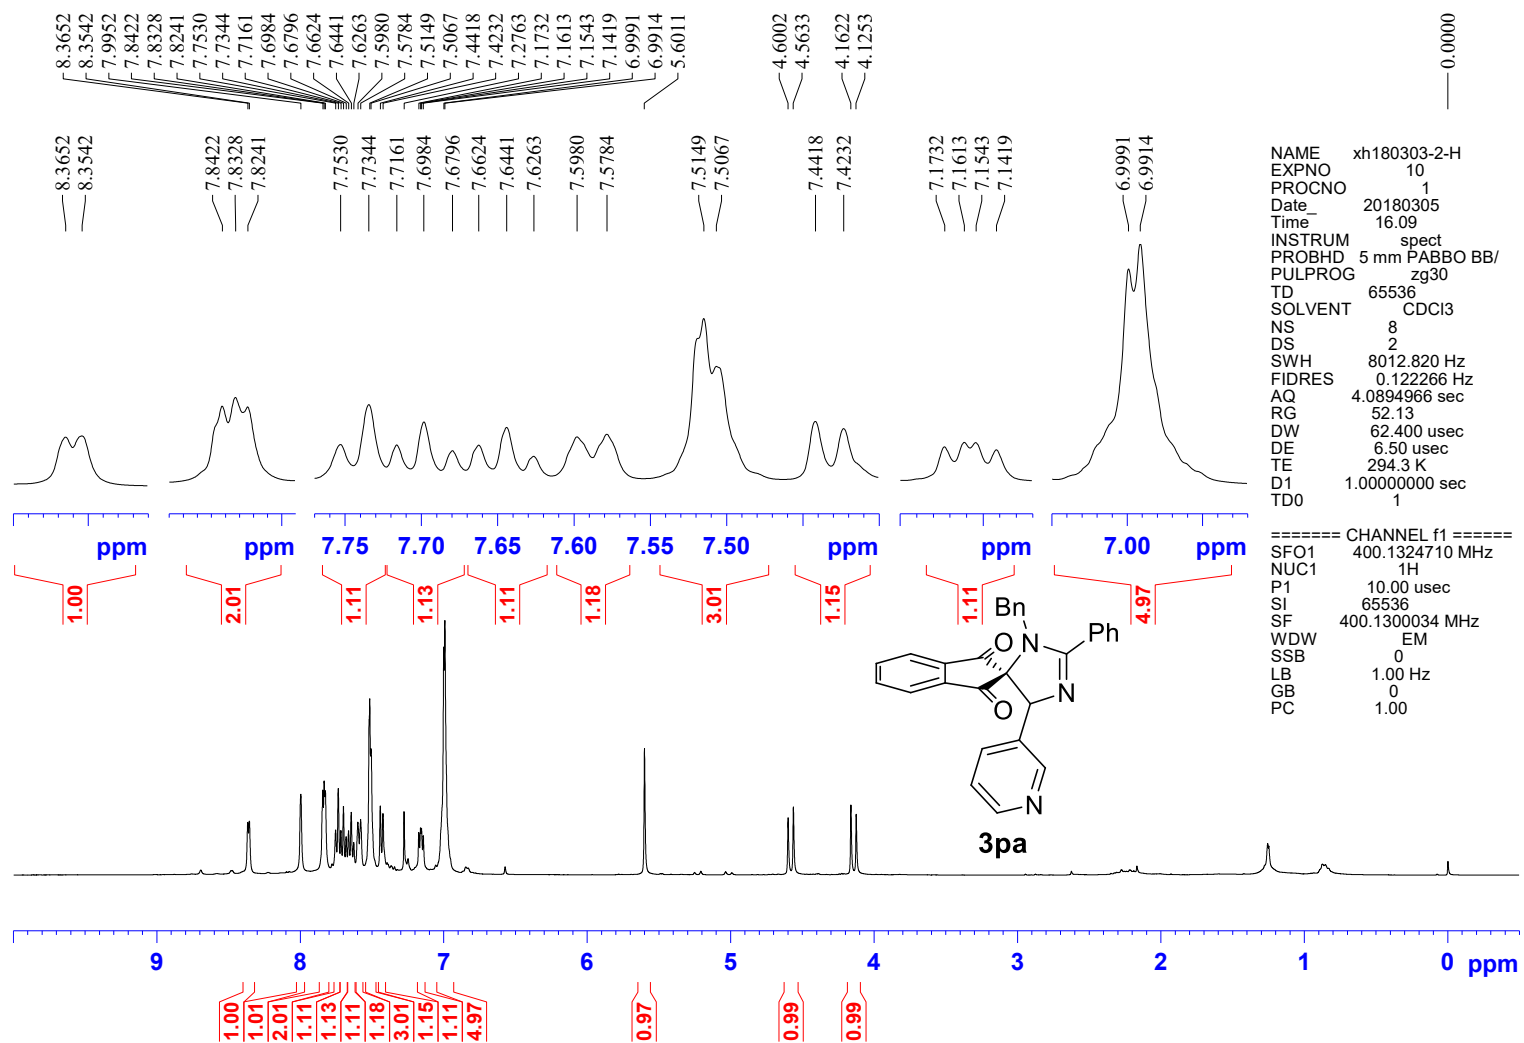

Figure S37. <sup>1</sup>H NMR (400 MHz, CDCl<sub>3</sub>) of compound 3pa

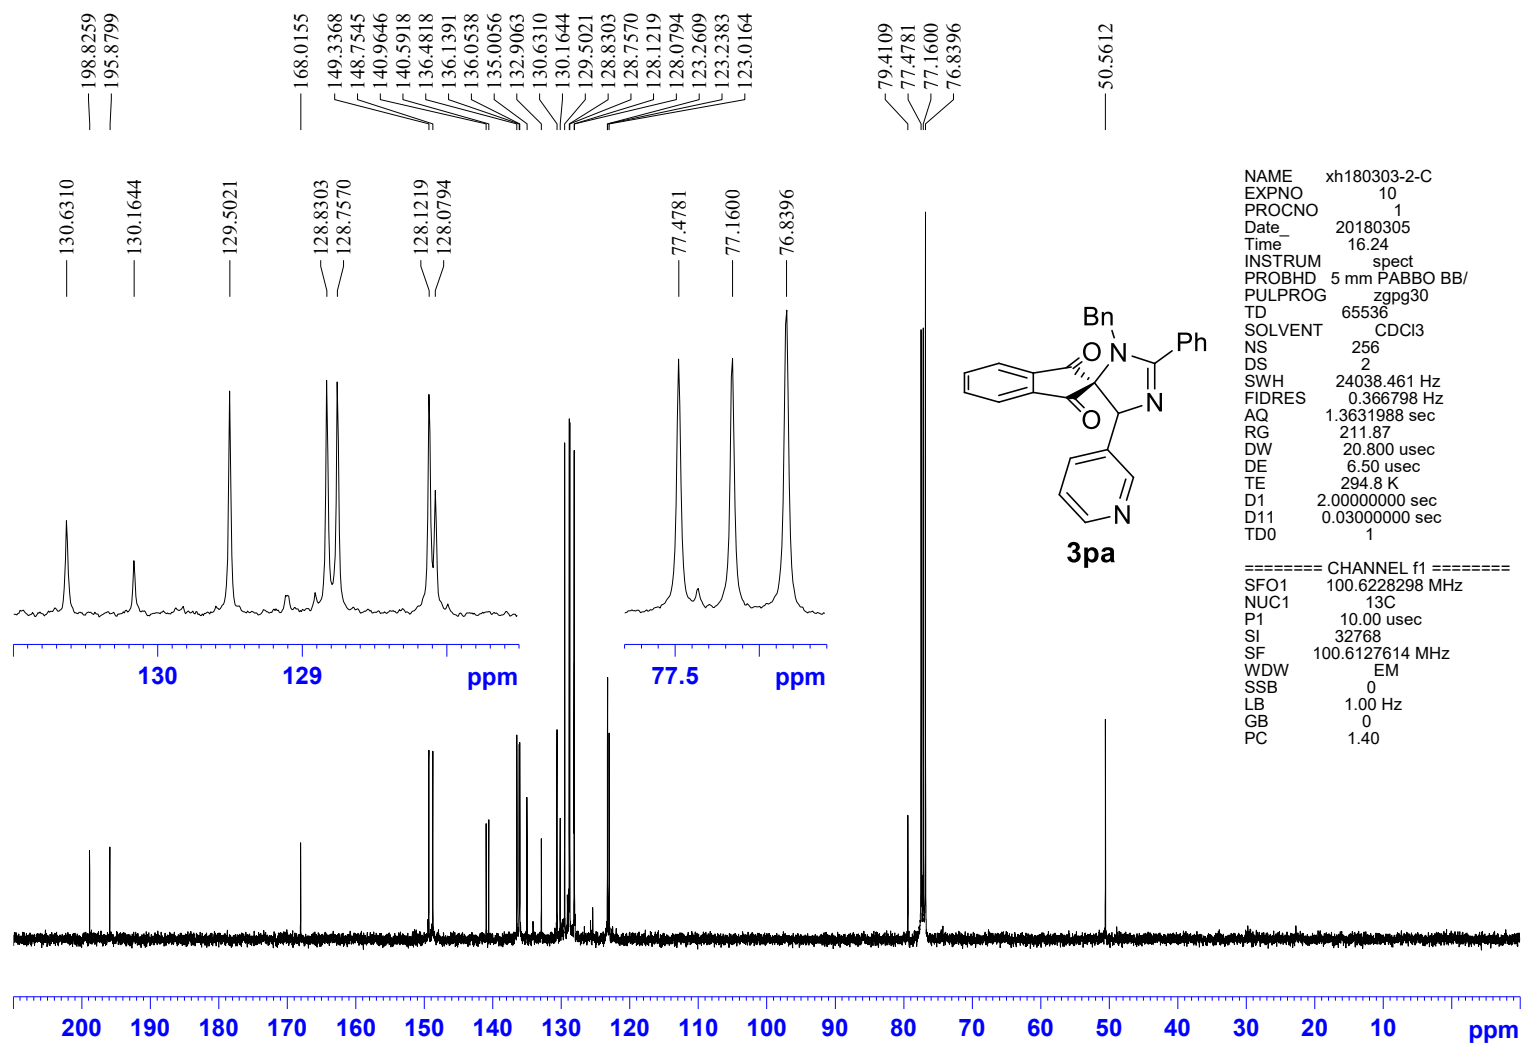

Figure S38. <sup>13</sup>C NMR (101 MHz, CDCl<sub>3</sub>) of compound 3pa

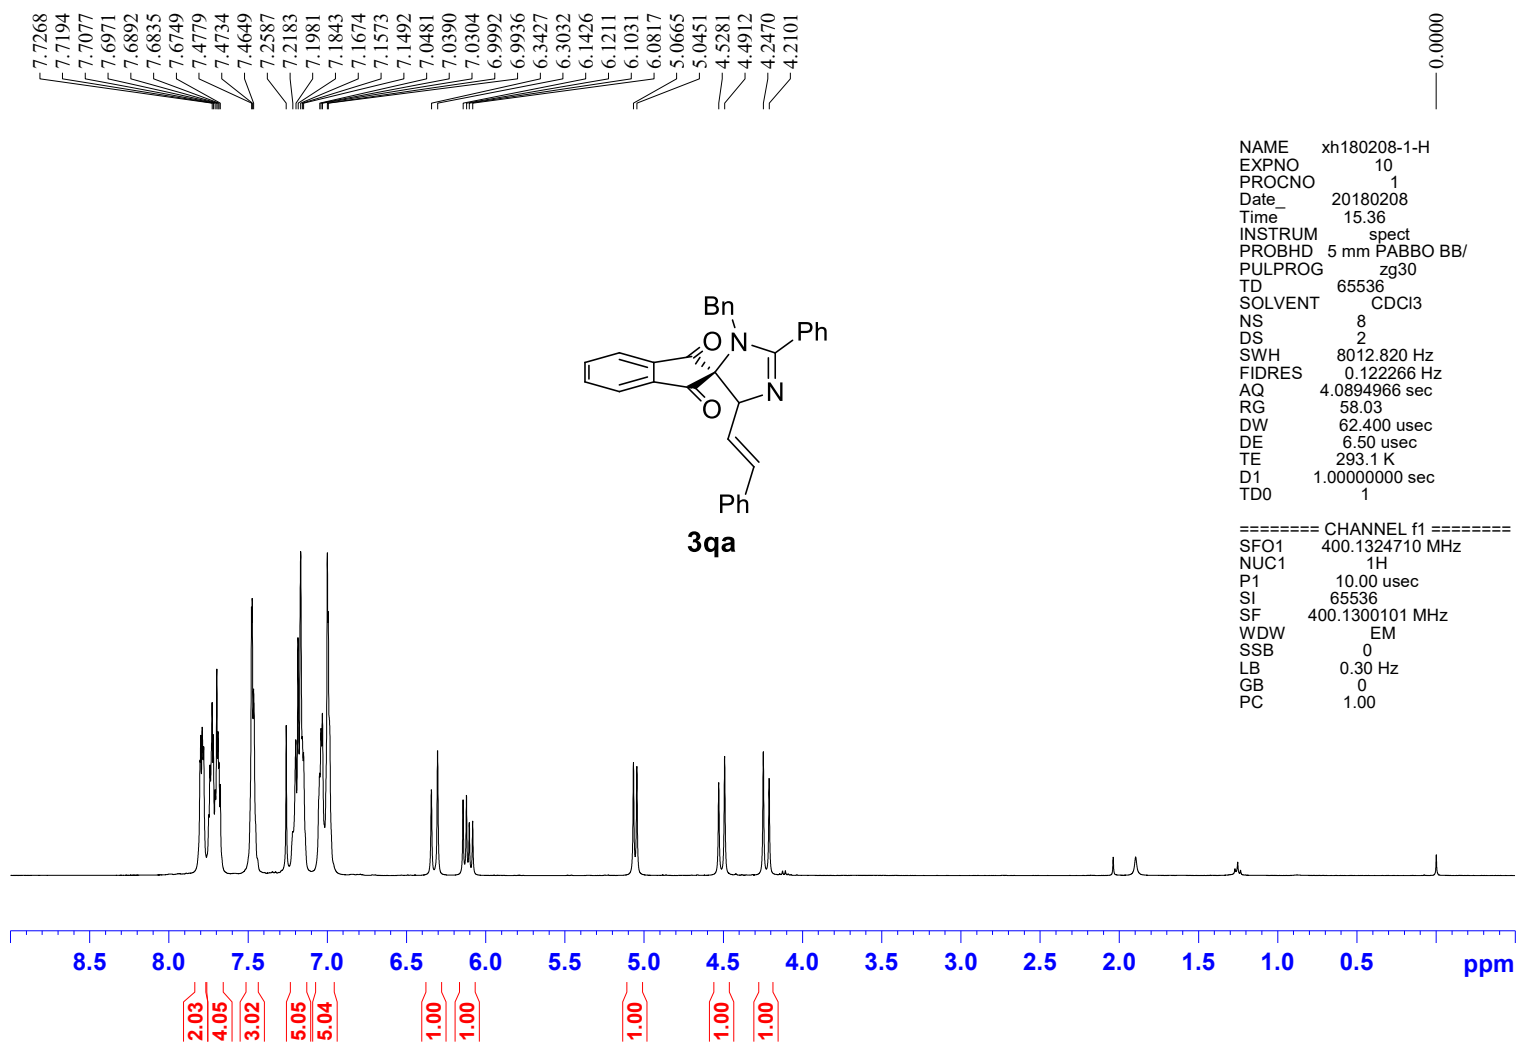

Figure S39. <sup>1</sup>H NMR (400 MHz, CDCl<sub>3</sub>) of compound 3qa

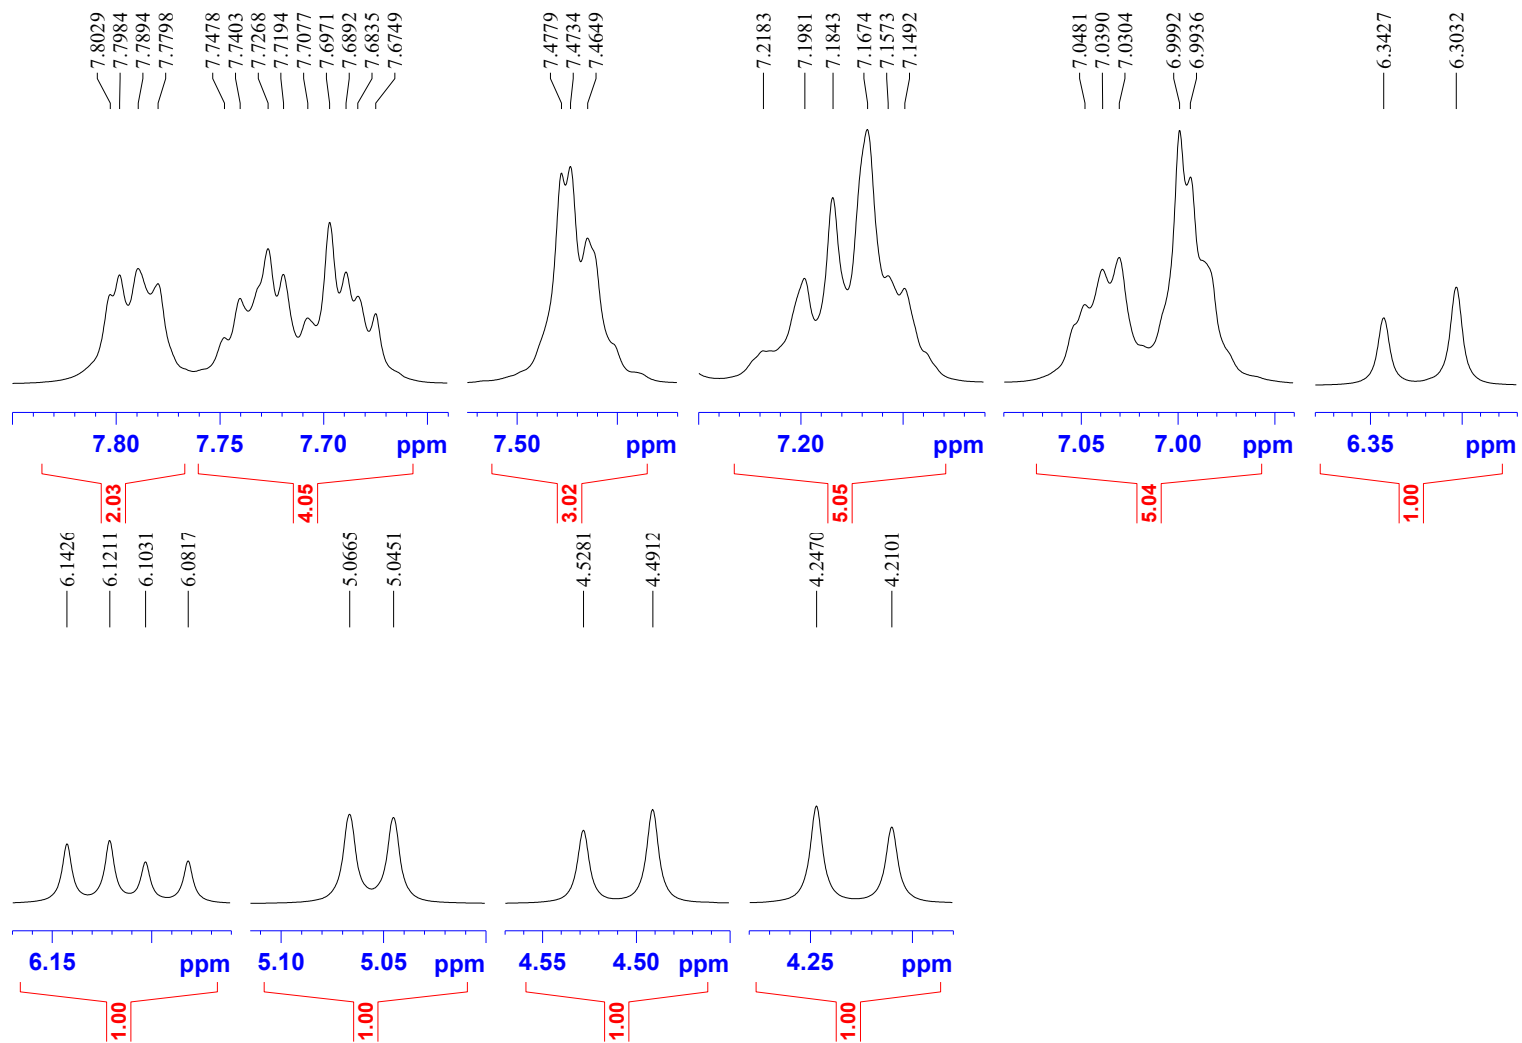

Figure S40. Expanded <sup>1</sup>H NMR (400 MHz, CDCl<sub>3</sub>) of compound 3qa



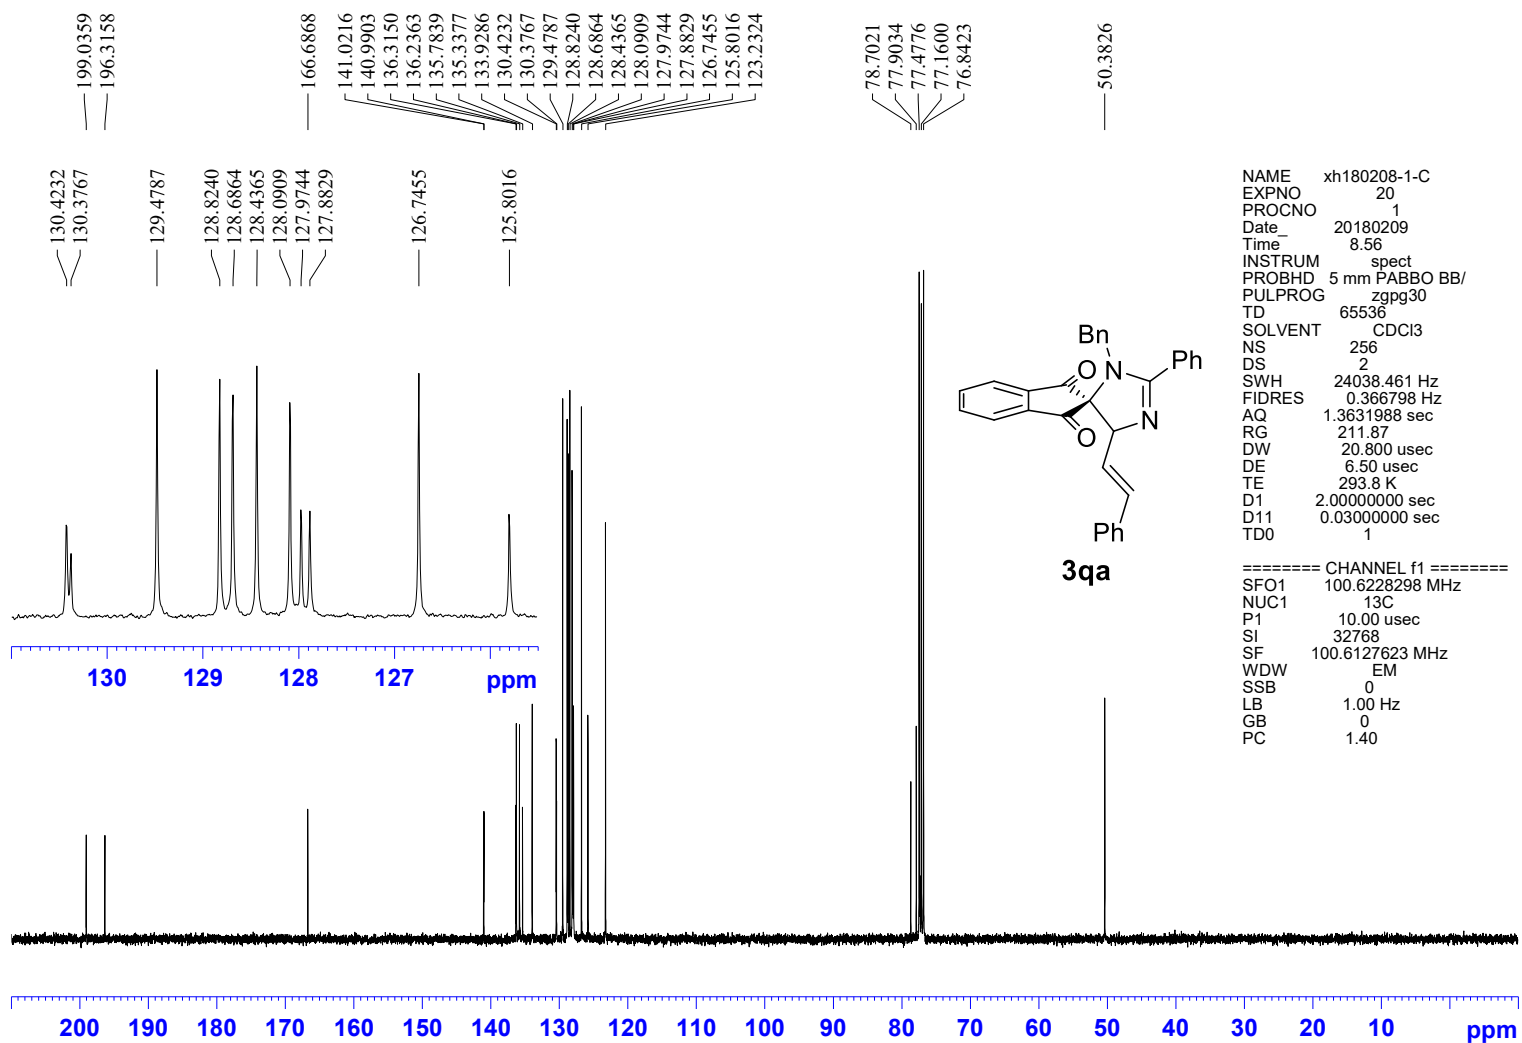

Figure S41.  $^{13}\text{C}$  NMR (101 MHz,  $\text{CDCl}_3$ ) of compound 3qa

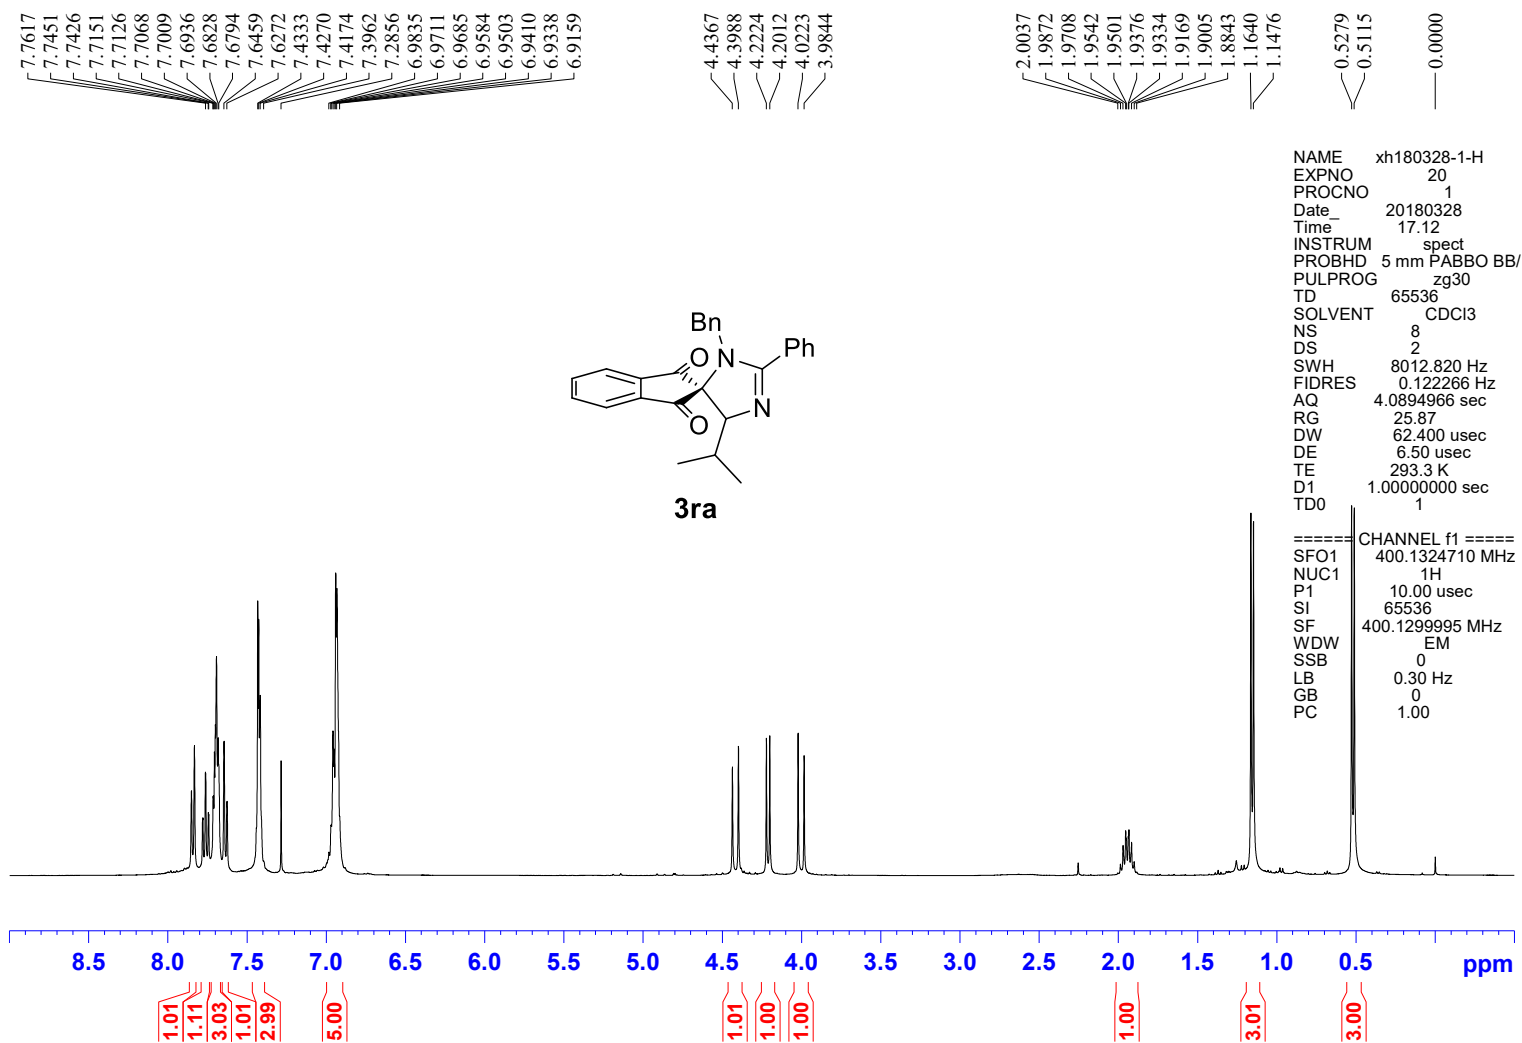

Figure S42.  $^1\text{H}$  NMR (400 MHz,  $\text{CDCl}_3$ ) of compound **3ra**

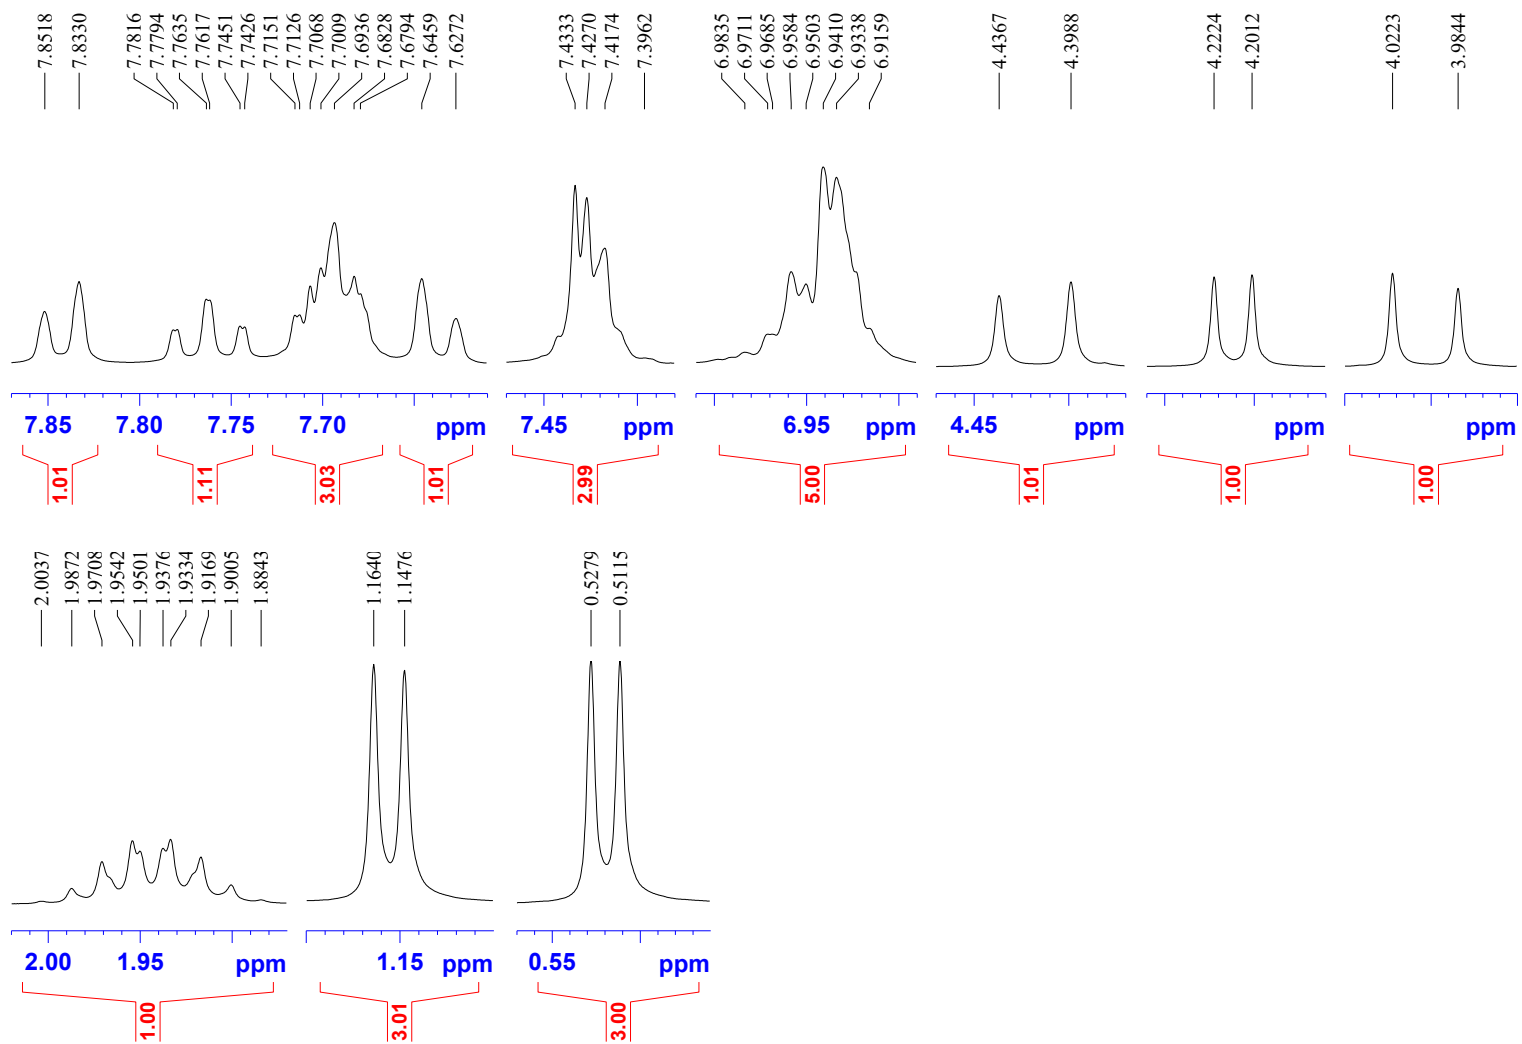

Figure S43. Expanded <sup>1</sup>H NMR (400 MHz, CDCl<sub>3</sub>) of compound 3ra

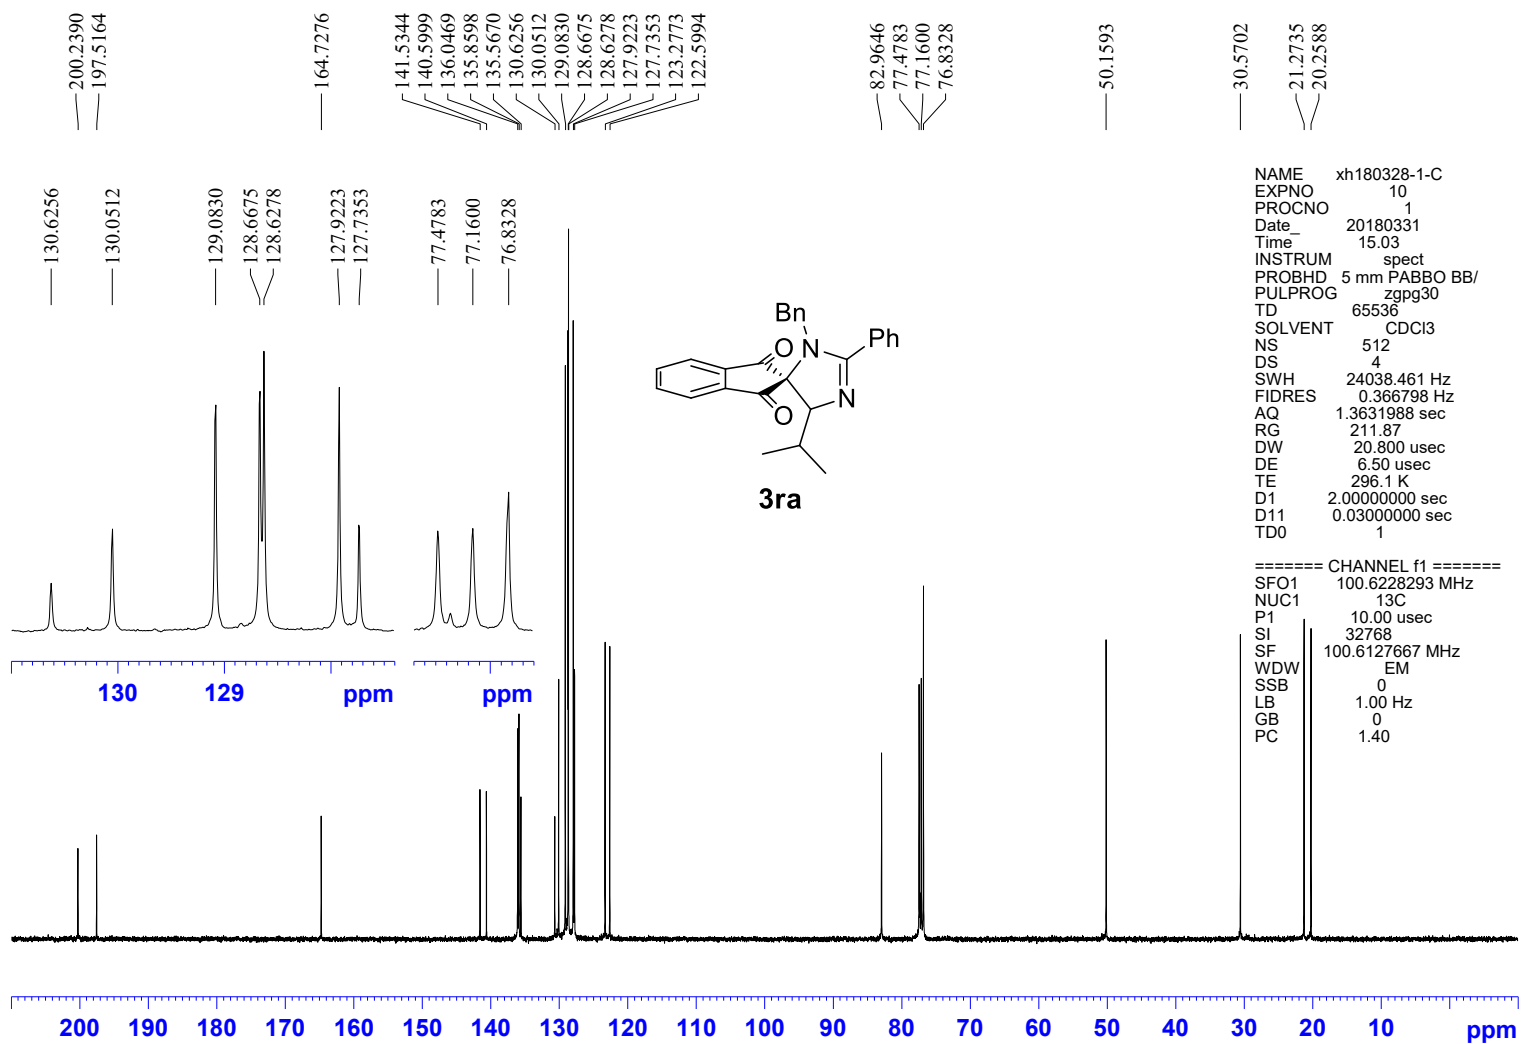

Figure S44. <sup>13</sup>C NMR (101 MHz, CDCl<sub>3</sub>) of compound 3ra

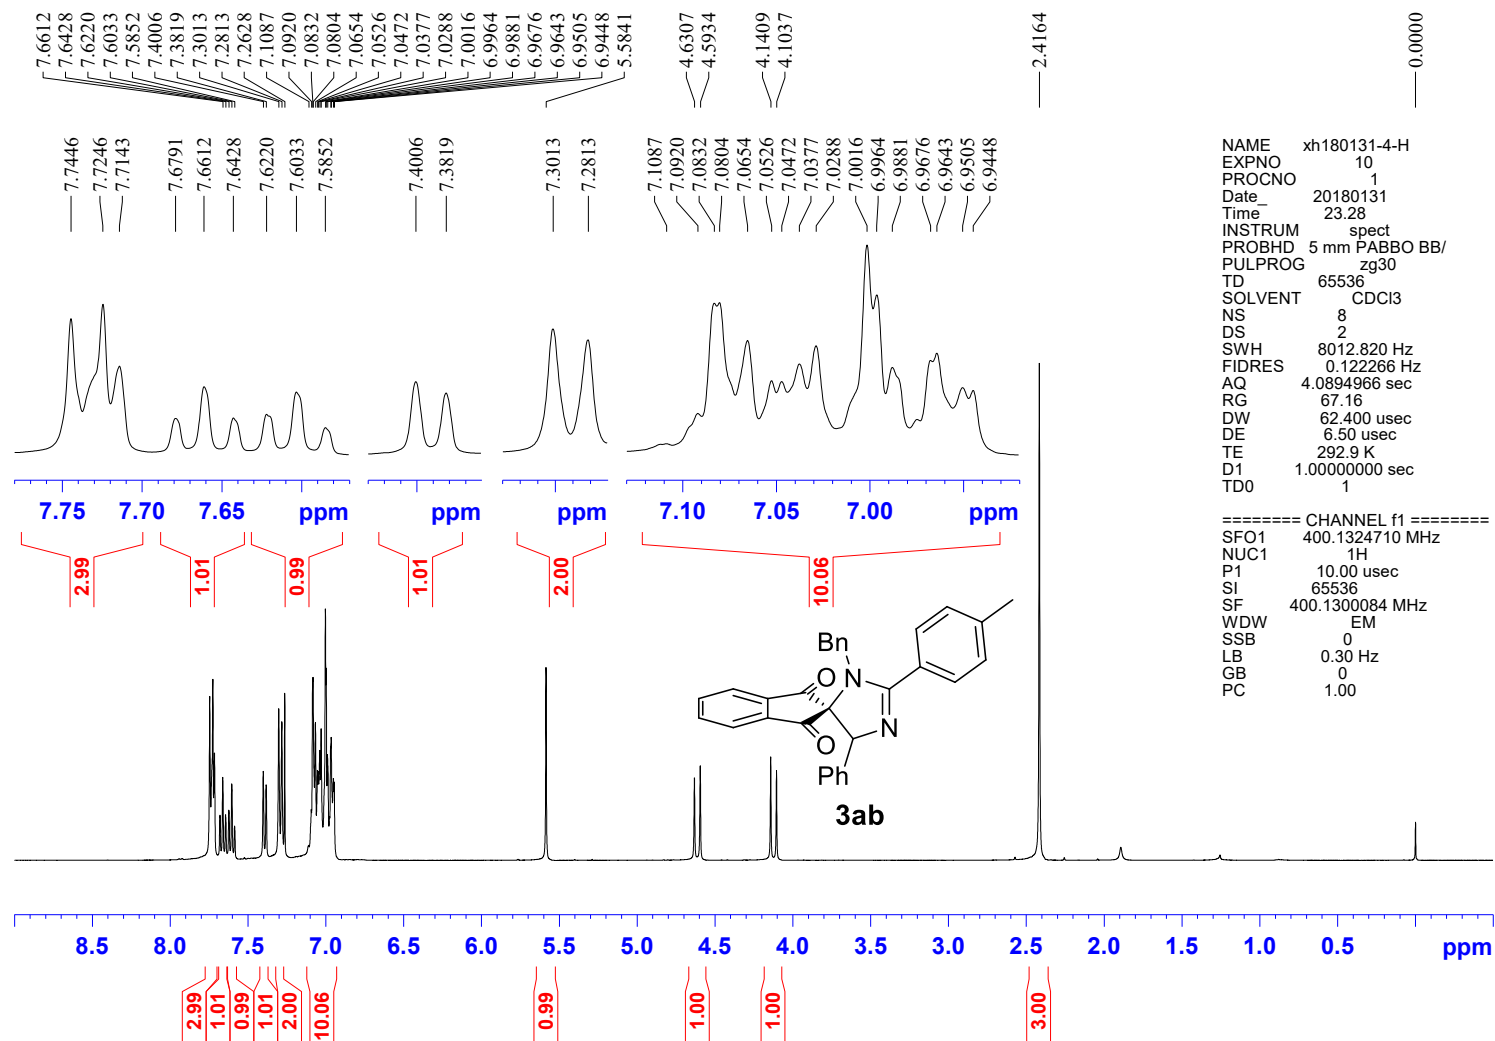

Figure S45. <sup>1</sup>H NMR (400 MHz, CDCl<sub>3</sub>) of compound 3ab

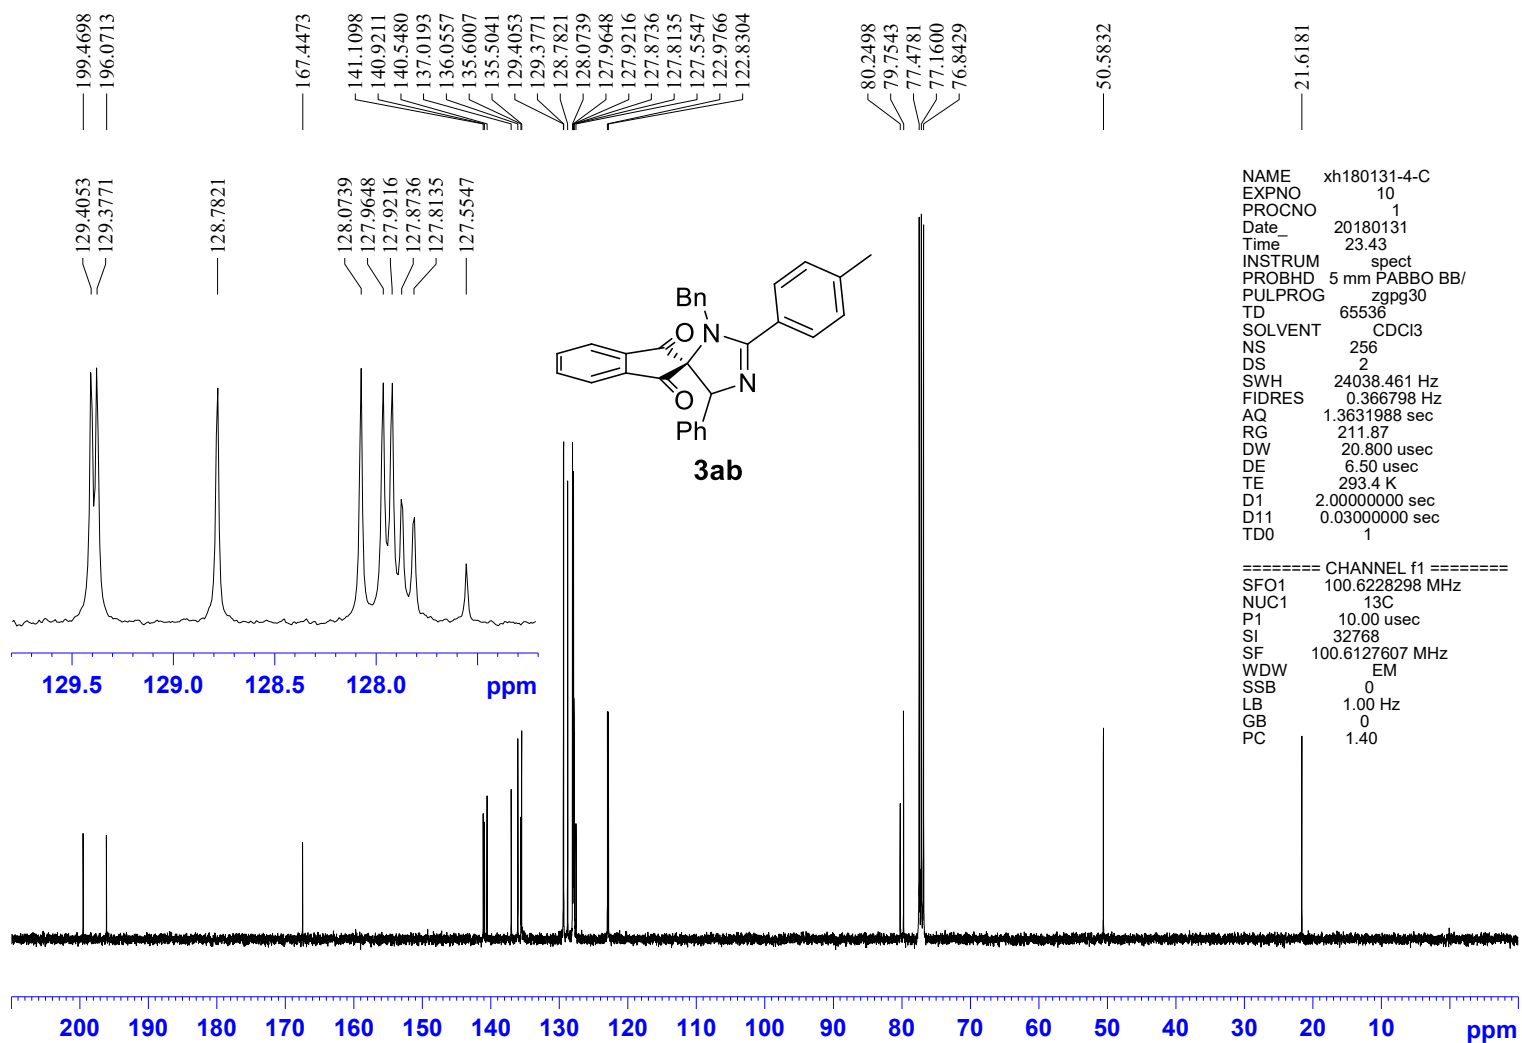

Figure S46. <sup>13</sup>C NMR (101 MHz, CDCl<sub>3</sub>) of compound 3ab

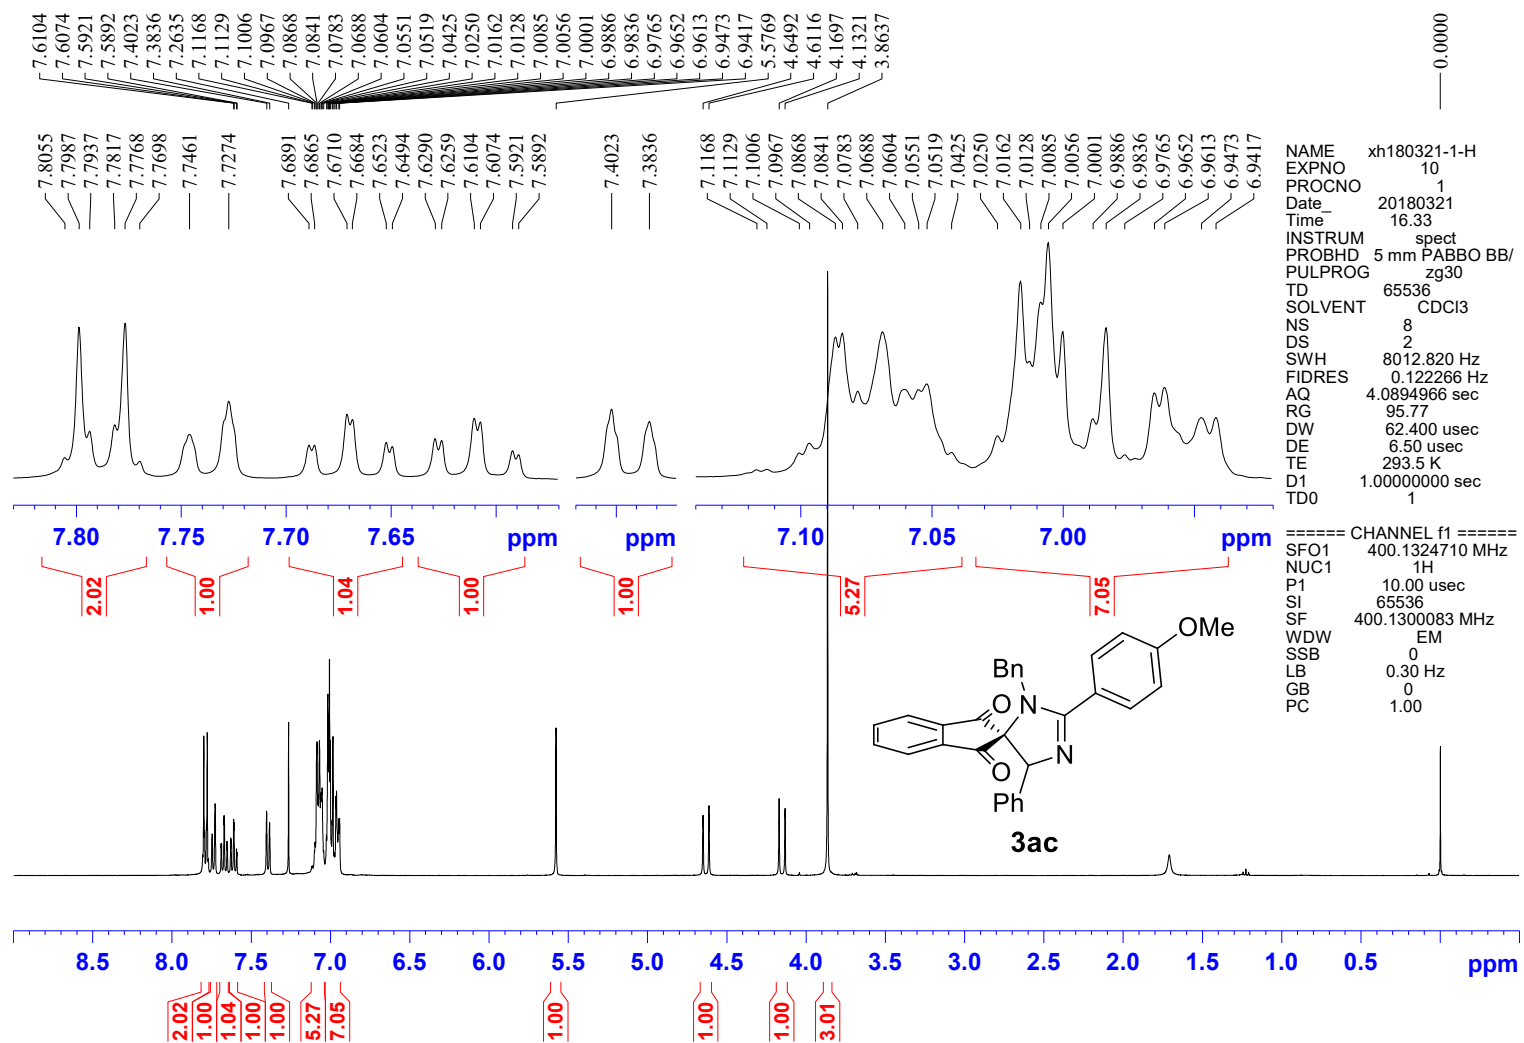

Figure S47.  $^1\text{H}$  NMR (400 MHz,  $\text{CDCl}_3$ ) of compound 3ac

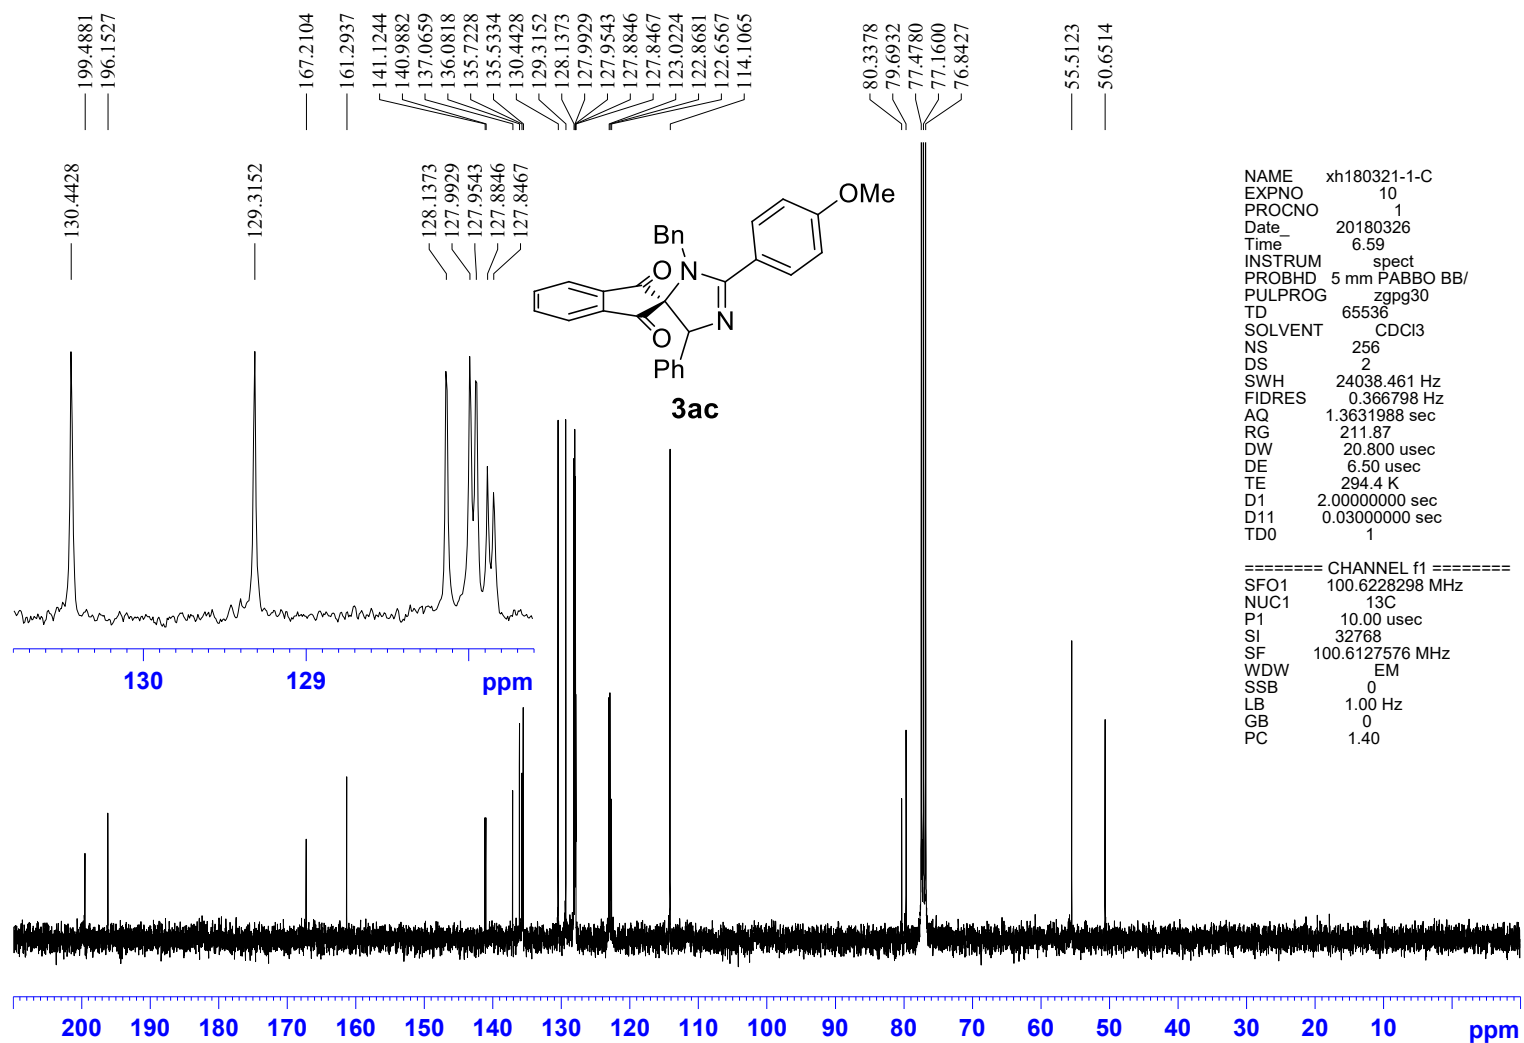

Figure S48. <sup>13</sup>C NMR (101 MHz, CDCl<sub>3</sub>) of compound 3ac



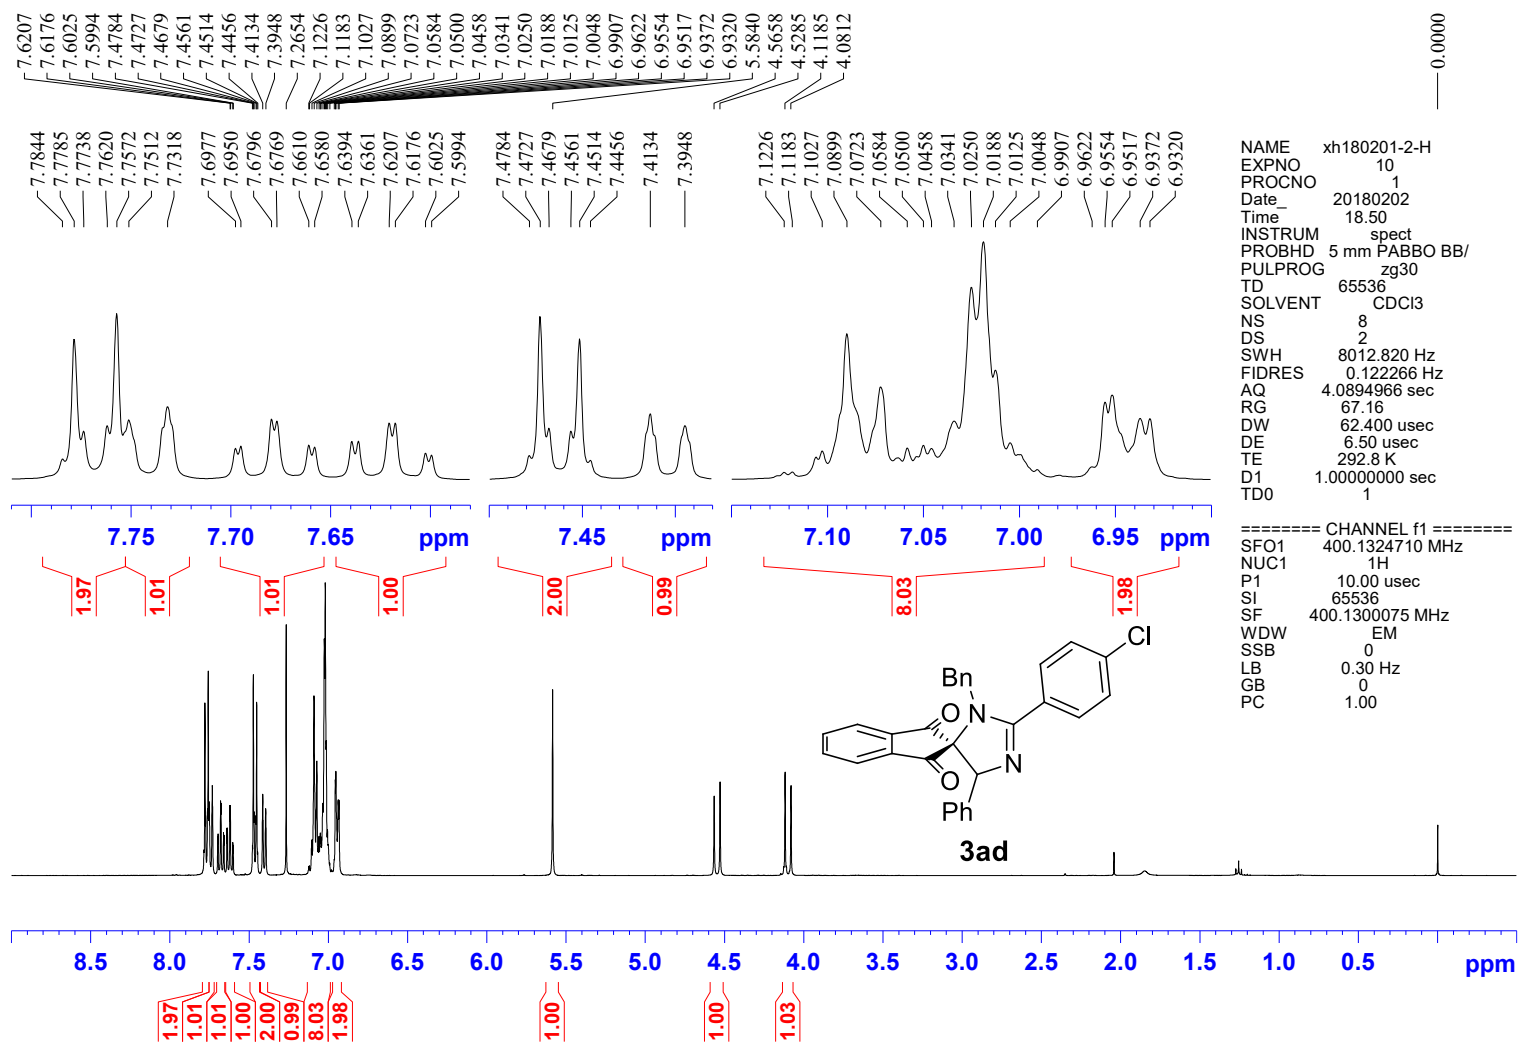

Figure S49. <sup>1</sup>H NMR (400 MHz, CDCl<sub>3</sub>) of compound **3ad**

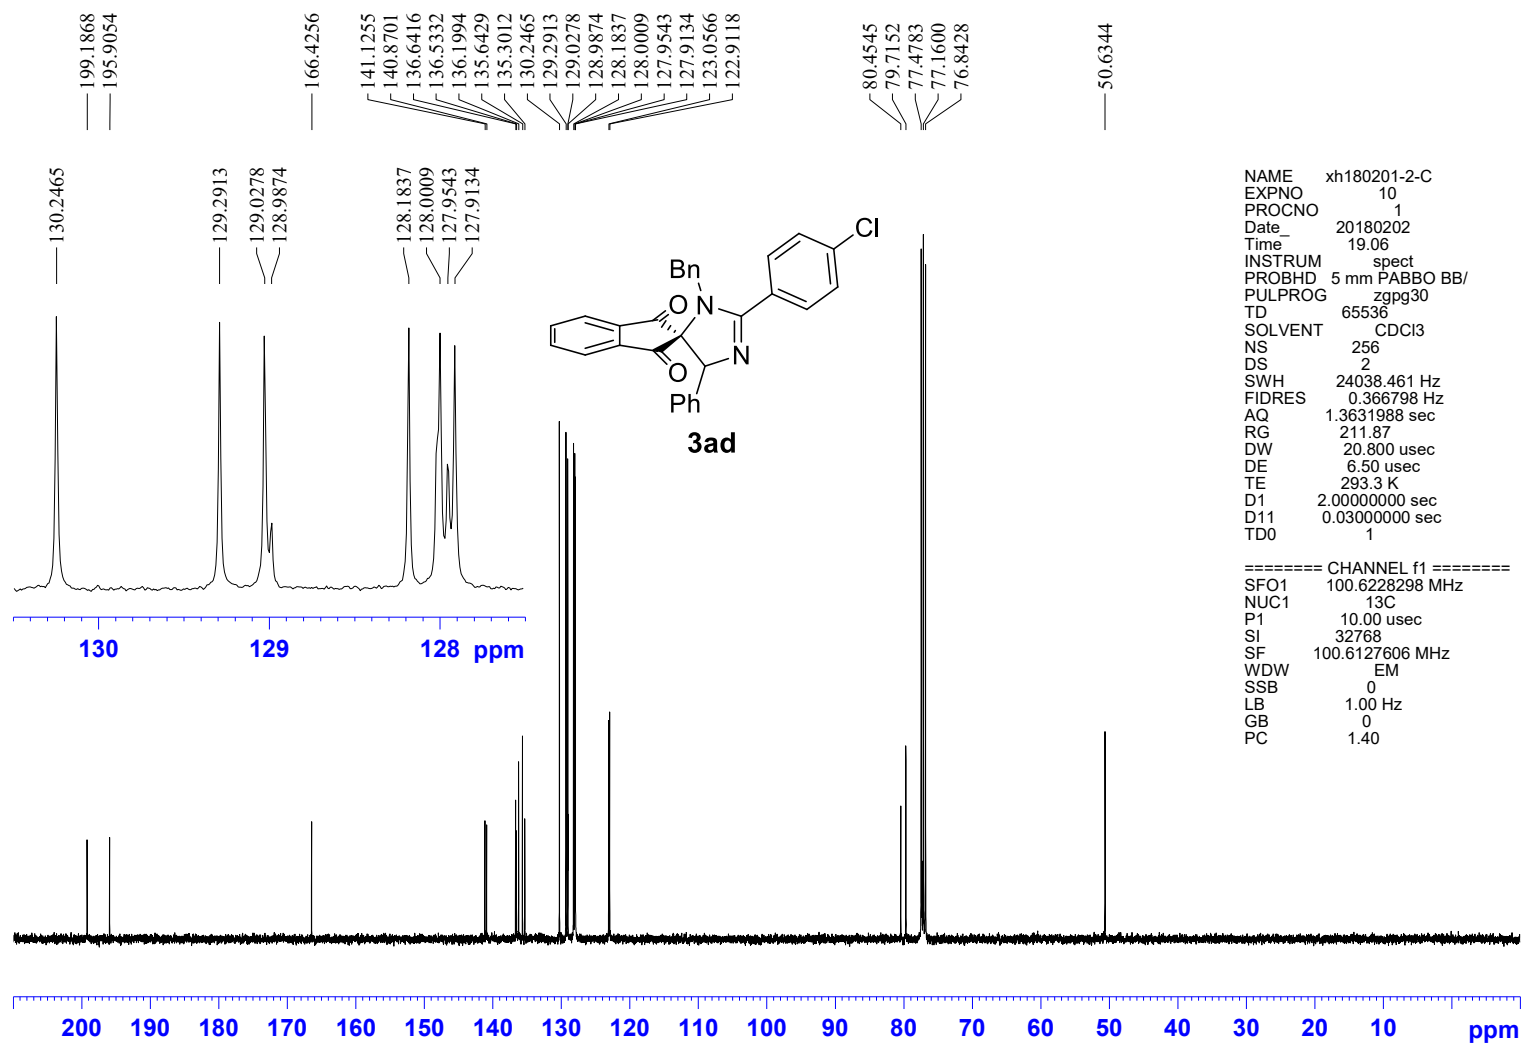

Figure S50.  $^{13}\text{C}$  NMR (101 MHz,  $\text{CDCl}_3$ ) of compound 3ad

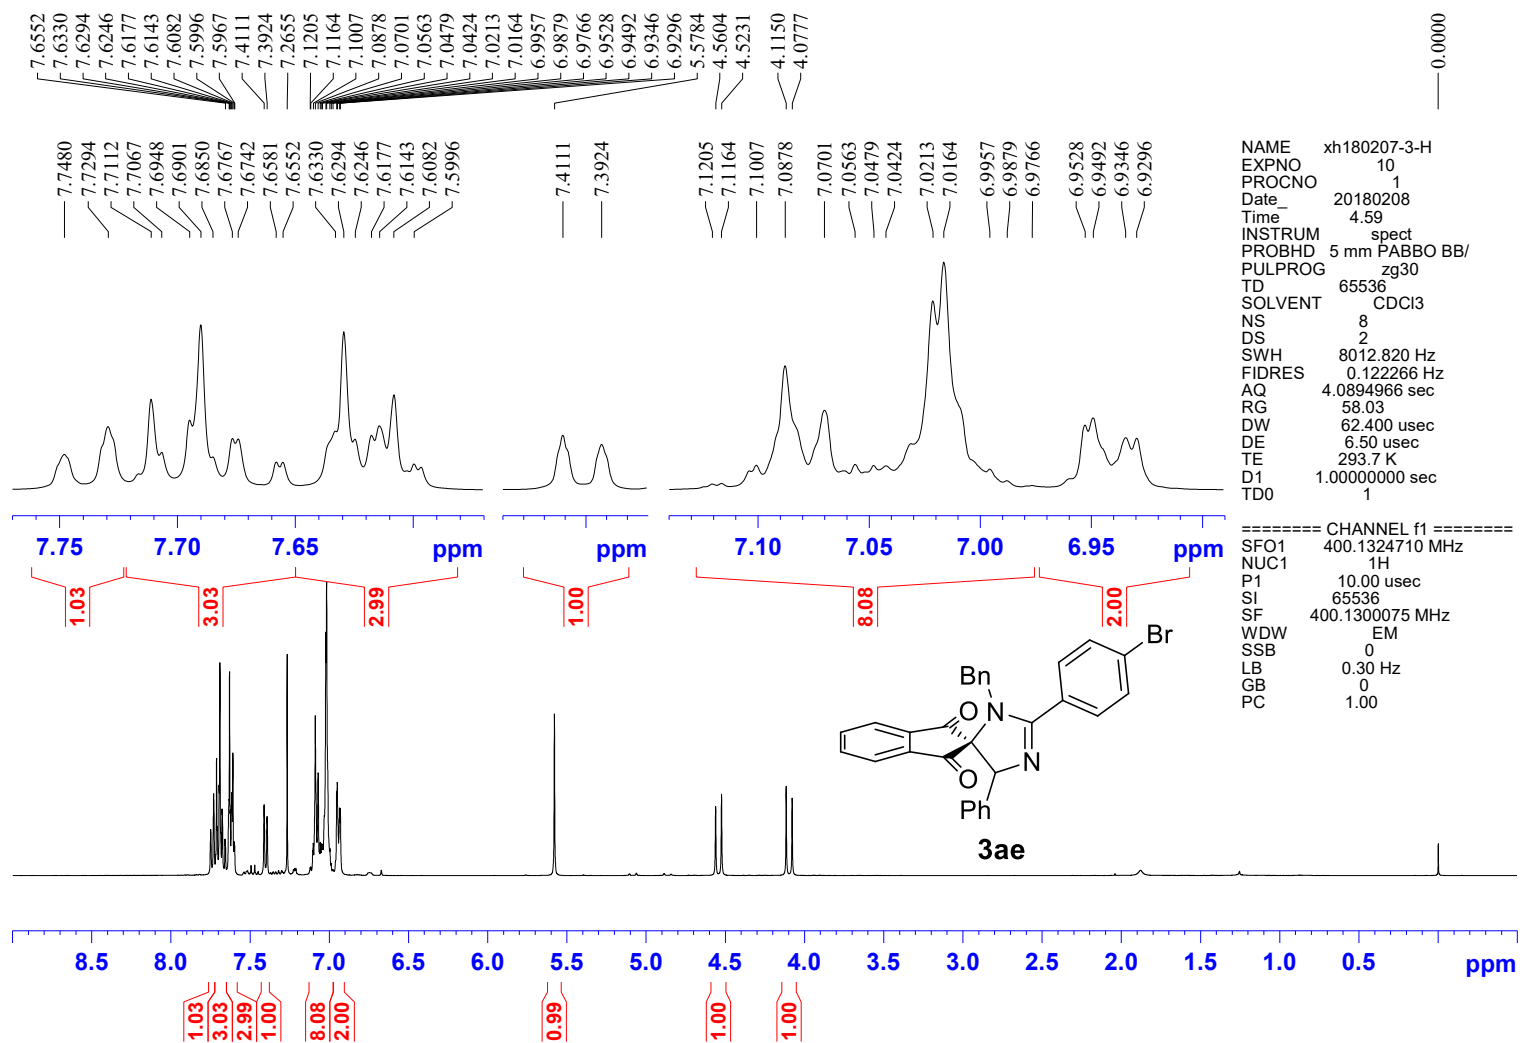

Figure S51. <sup>1</sup>H NMR (400 MHz, CDCl<sub>3</sub>) of compound 3ae

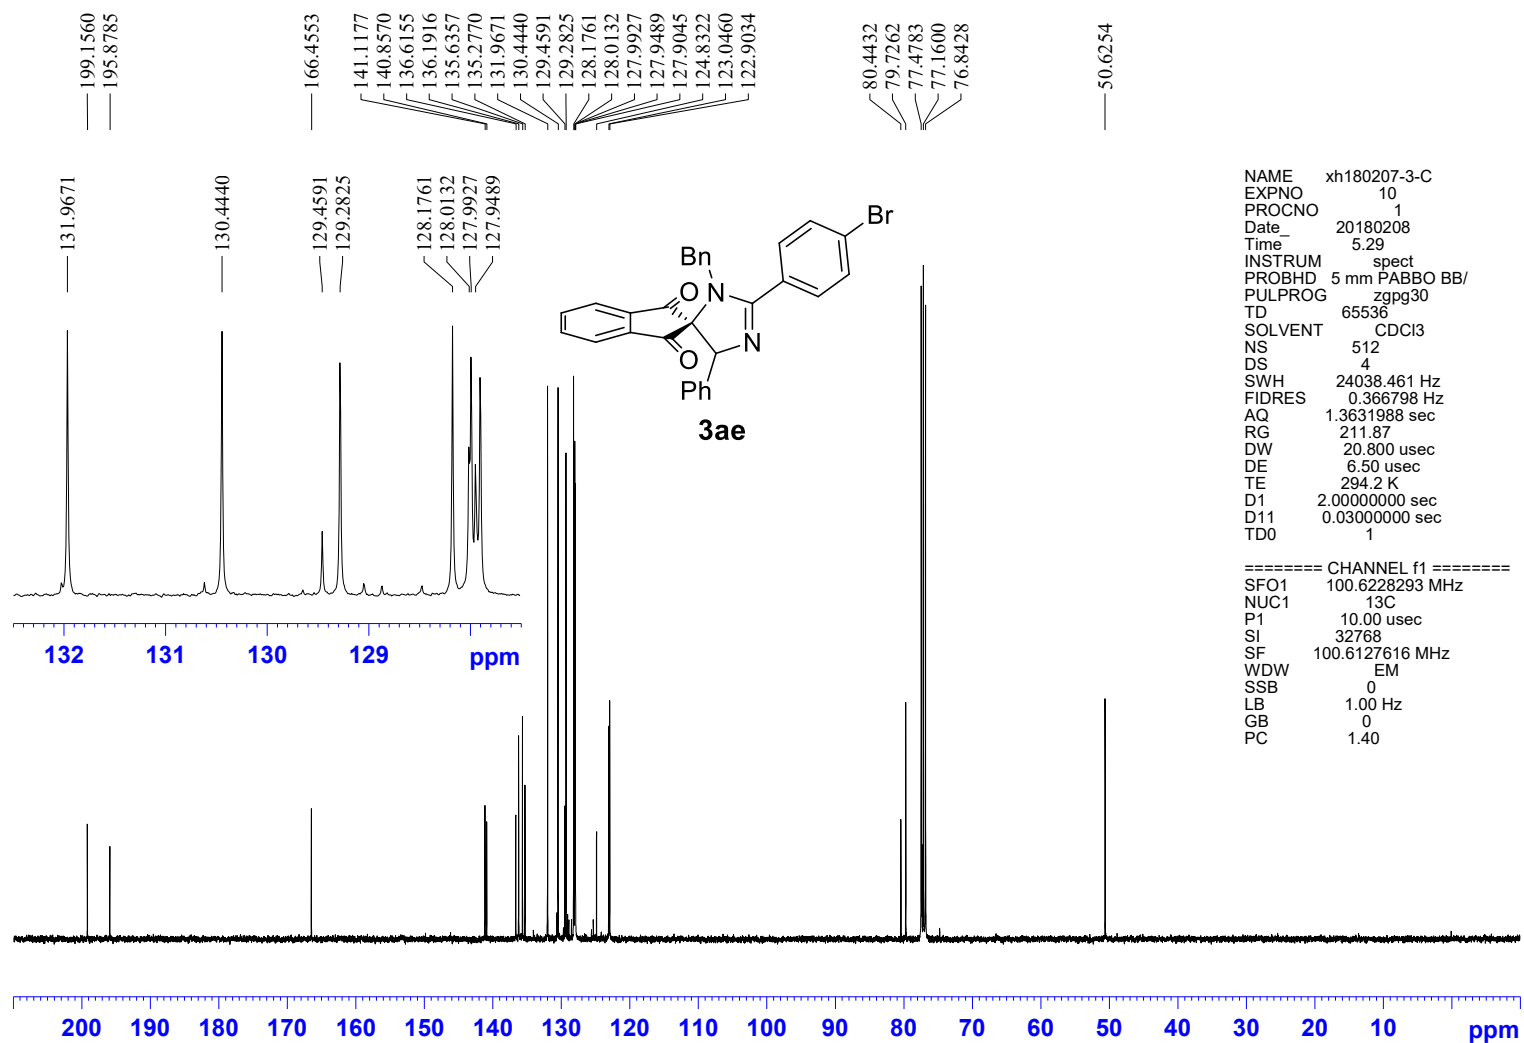

Figure S52. <sup>13</sup>C NMR (101 MHz, CDCl<sub>3</sub>) of compound **3ae**



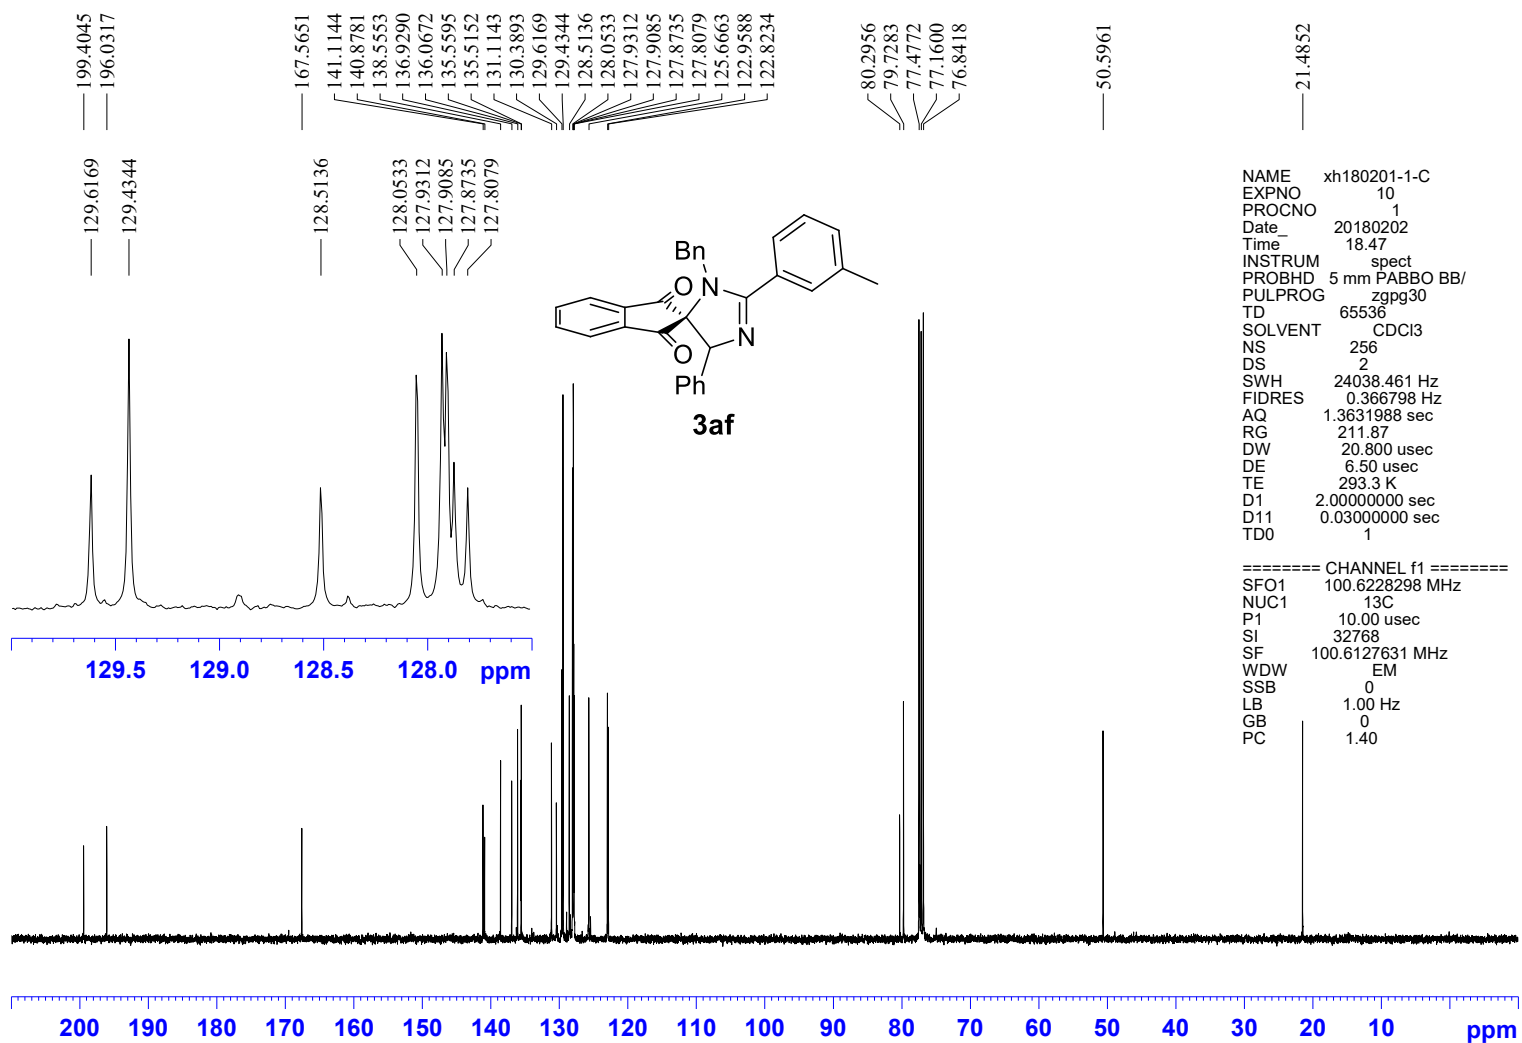

Figure S54.  $^{13}\text{C}$  NMR (101 MHz,  $\text{CDCl}_3$ ) of compound **3af**

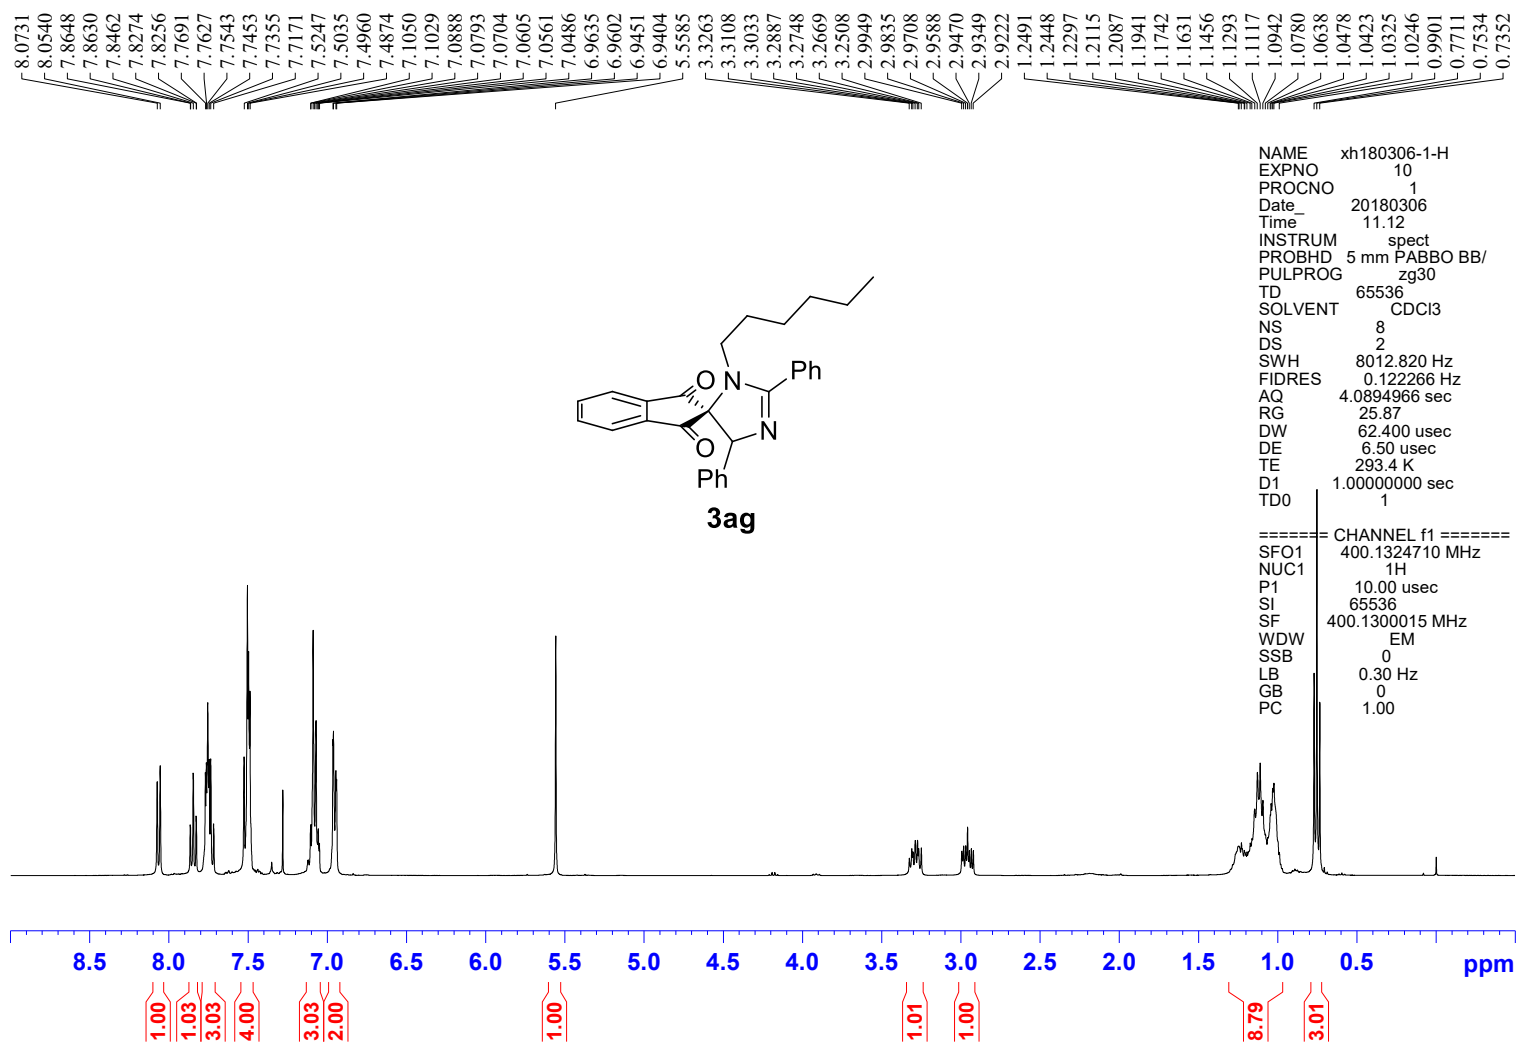

Figure S55. <sup>1</sup>H NMR (400 MHz, CDCl<sub>3</sub>) of compound **3ag**

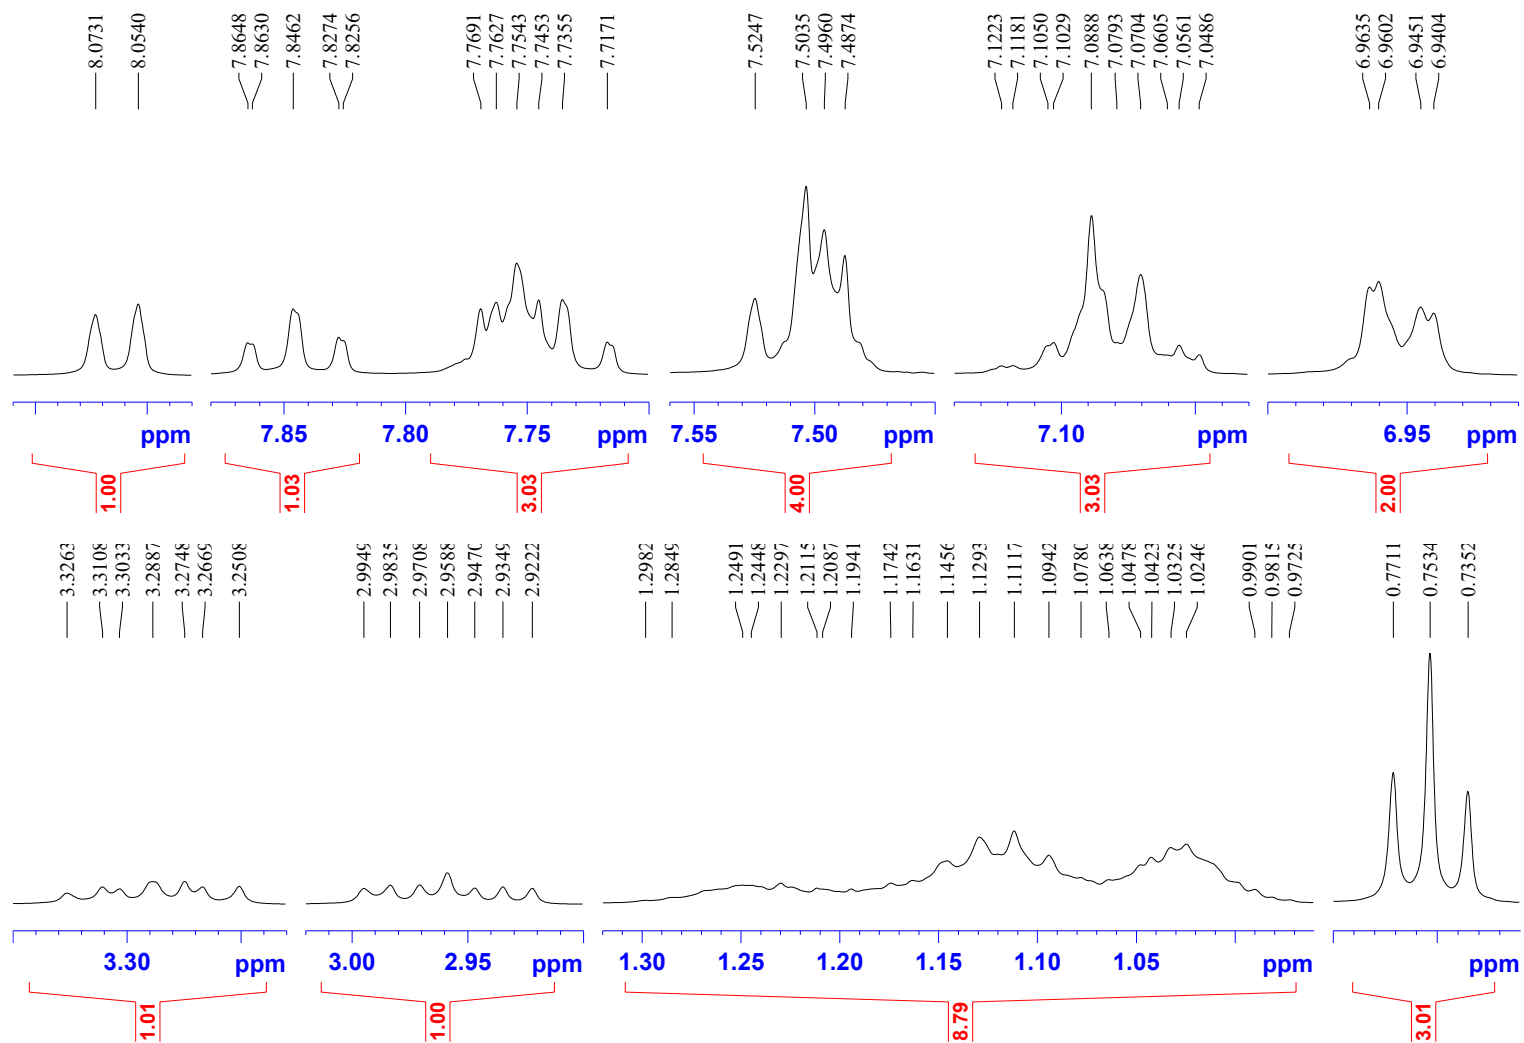

Figure S56. Expanded  $^1\text{H}$  NMR (400 MHz,  $\text{CDCl}_3$ ) of compound 3ag



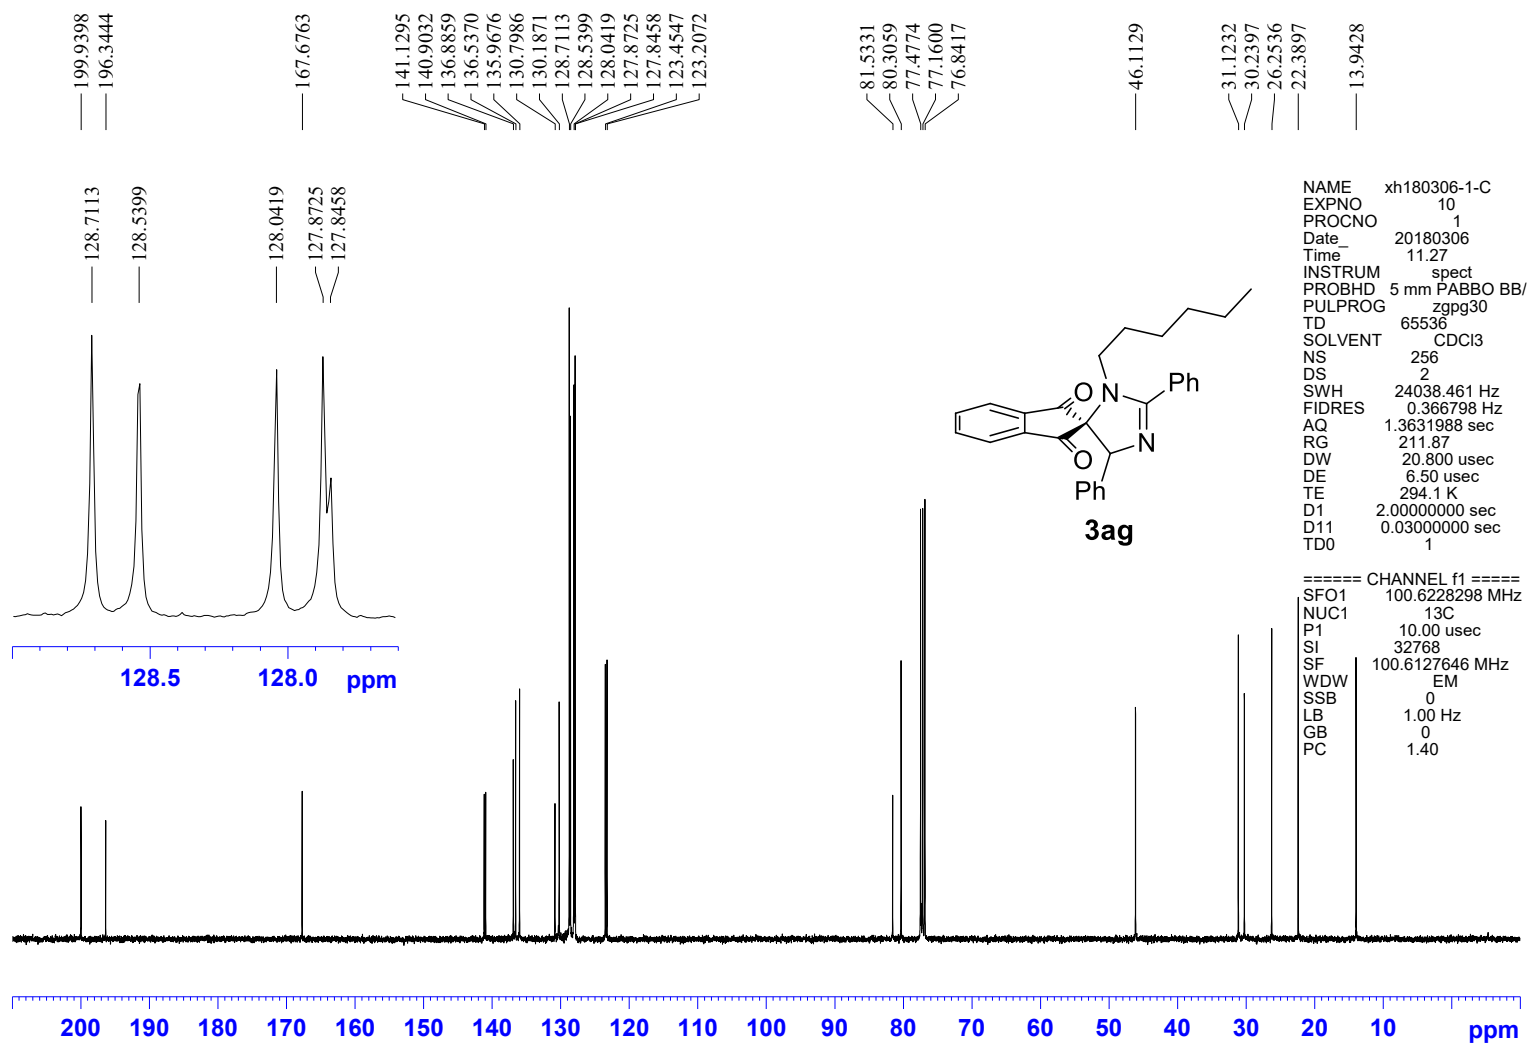

Figure S57. <sup>13</sup>C NMR (101 MHz, CDCl<sub>3</sub>) of compound 3ag

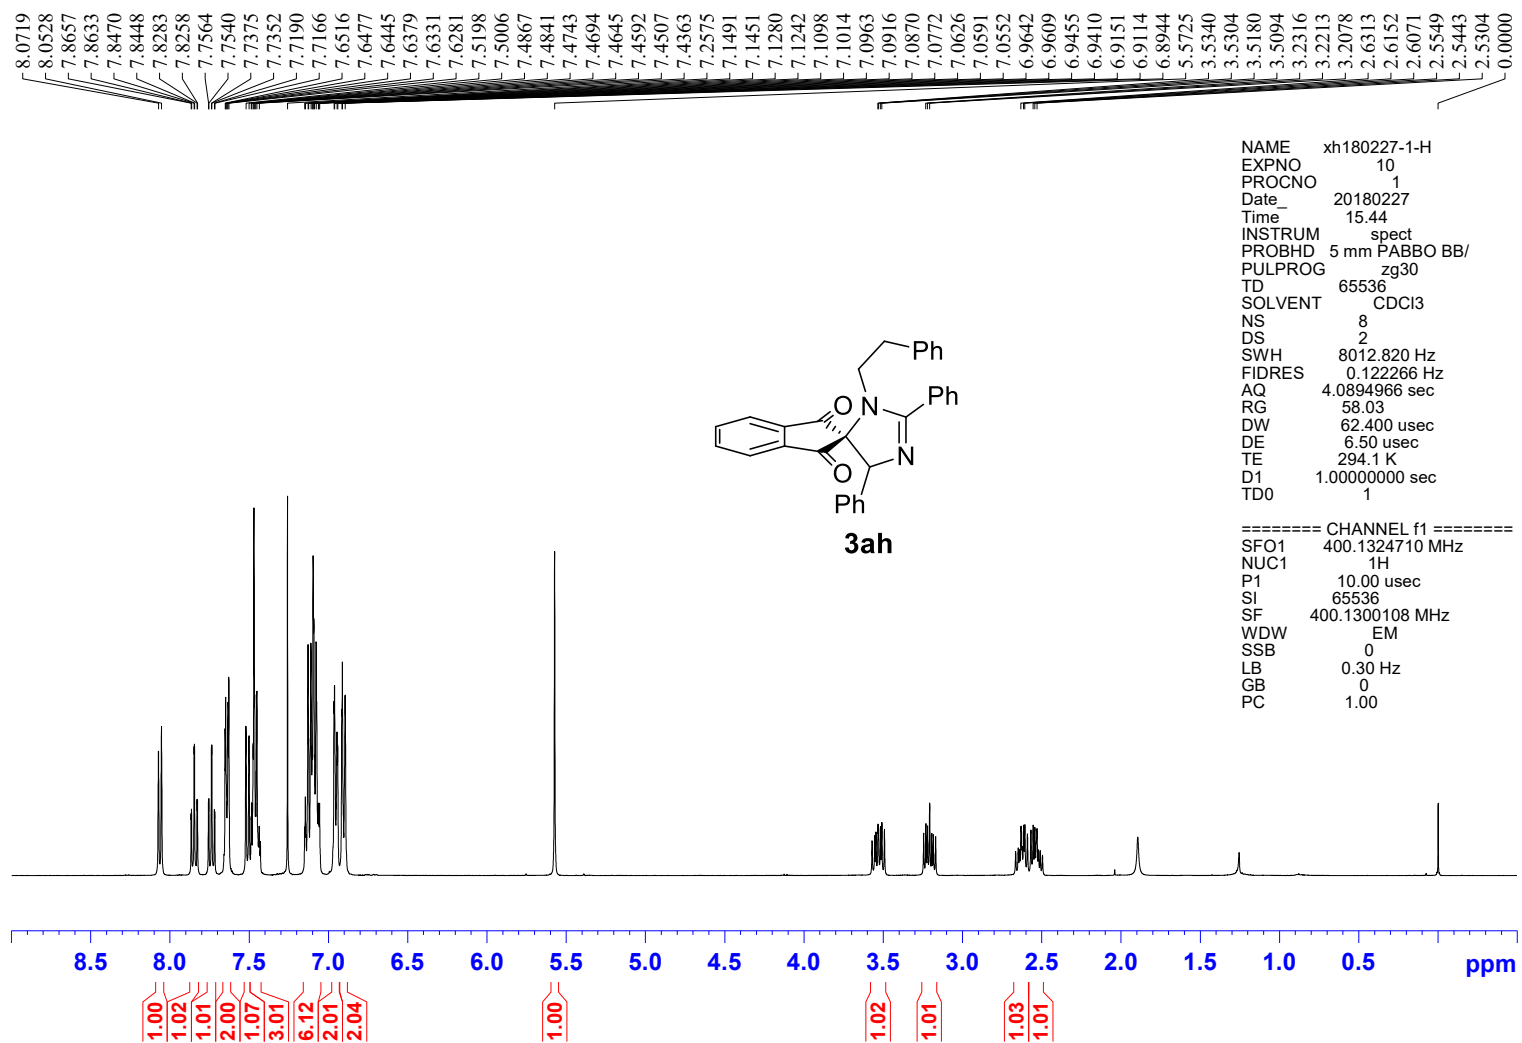

Figure S58. <sup>1</sup>H NMR (400 MHz, CDCl<sub>3</sub>) of compound 3ah

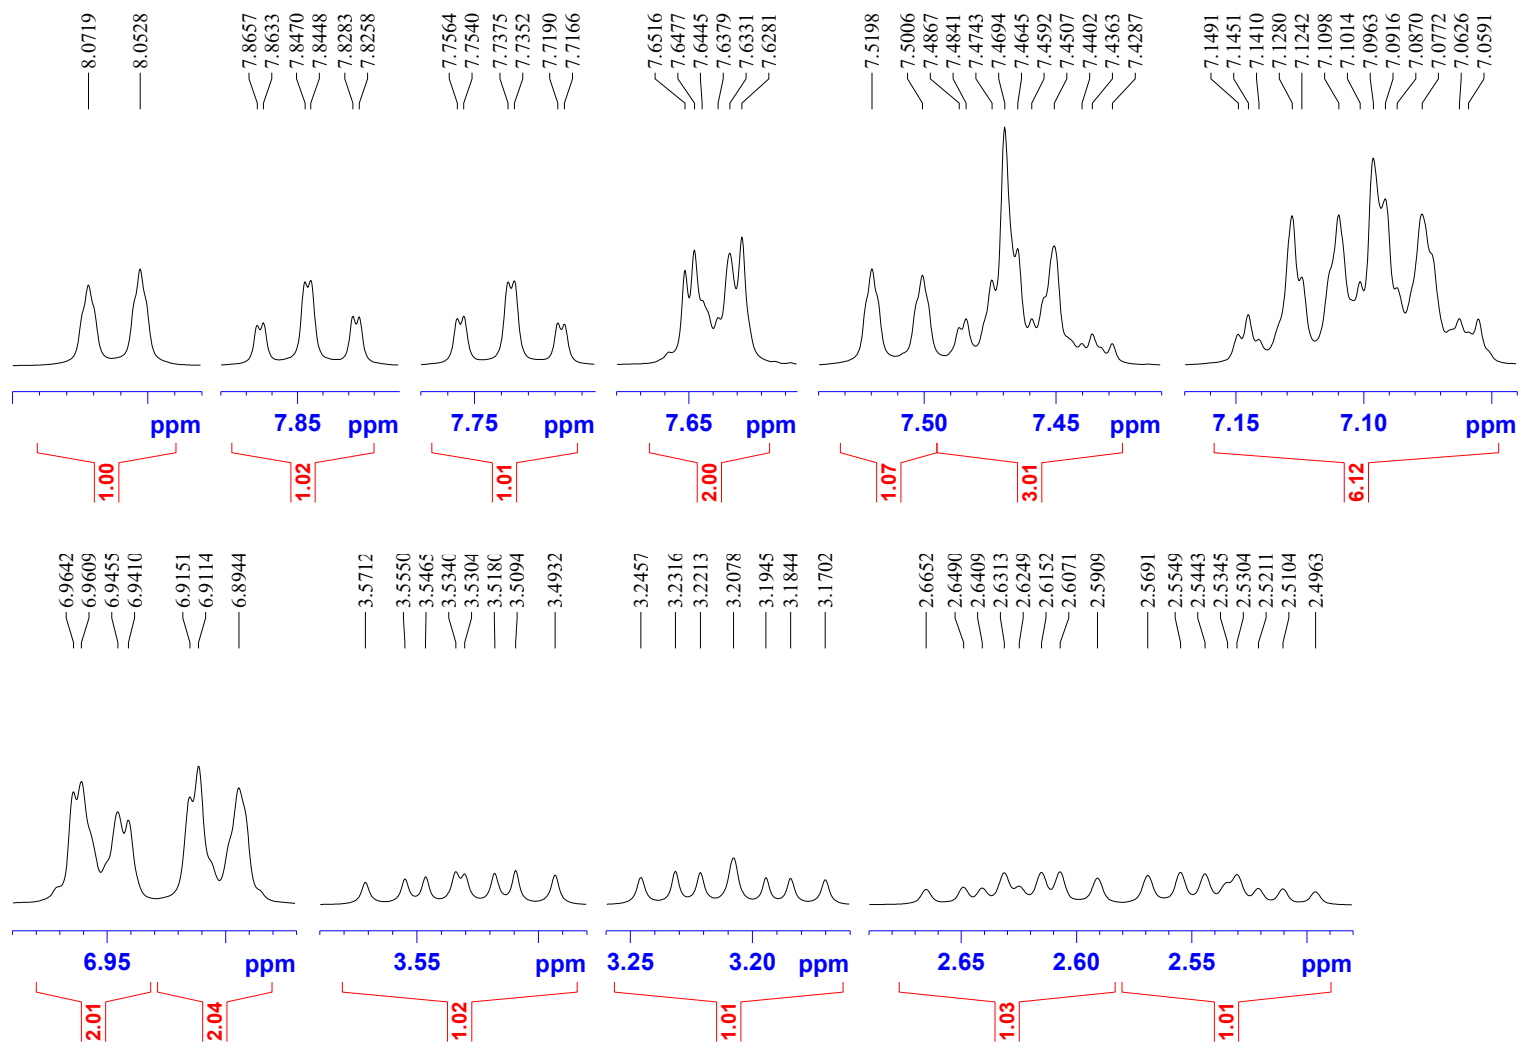

Figure S59. Expanded <sup>1</sup>H NMR (400 MHz, CDCl<sub>3</sub>) of compound 3ah

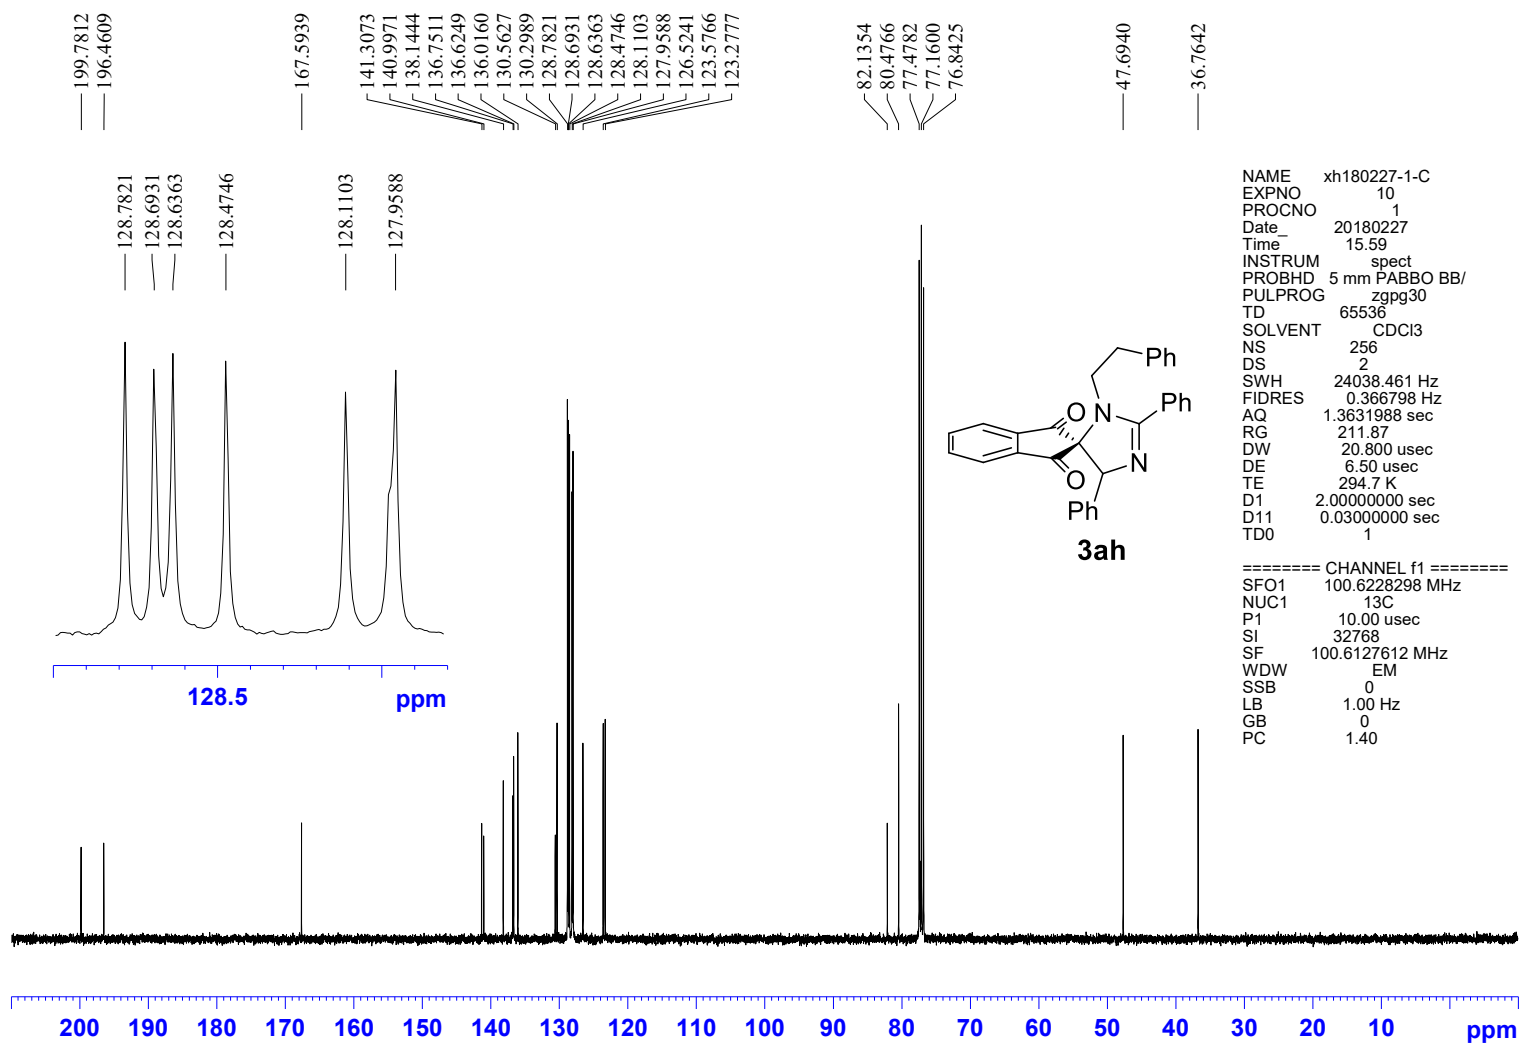

Figure S60. <sup>13</sup>C NMR (101 MHz, CDCl<sub>3</sub>) of compound 3ah

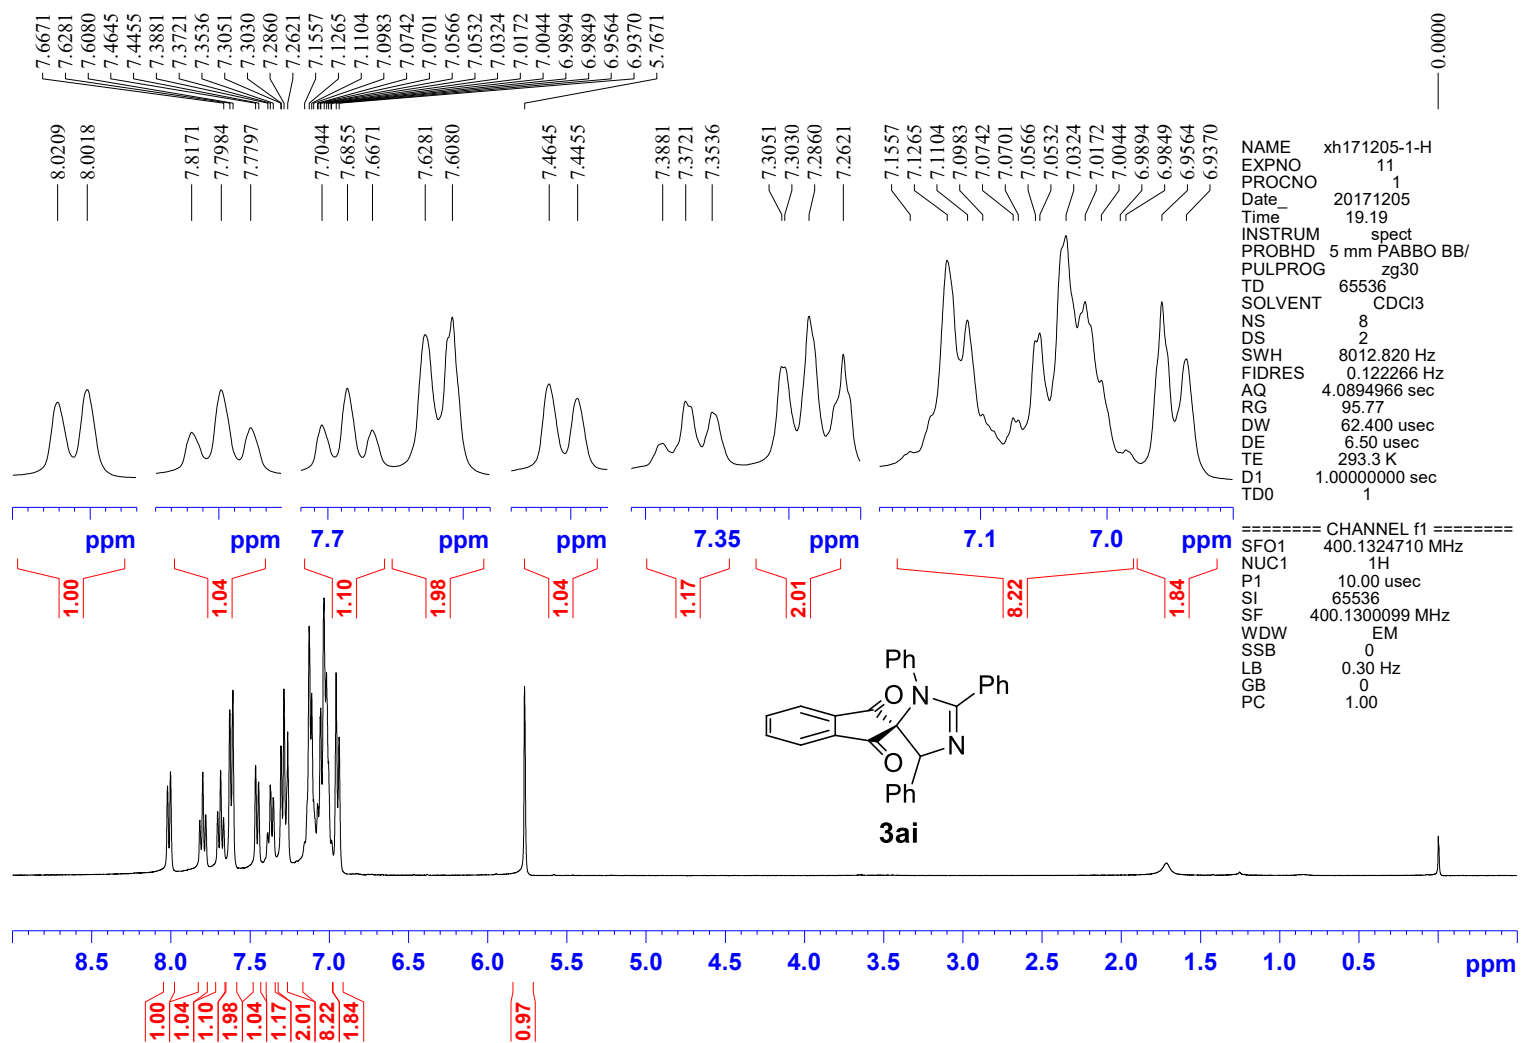

Figure S61.  $^1\text{H}$  NMR (400 MHz,  $\text{CDCl}_3$ ) of compound 3ai

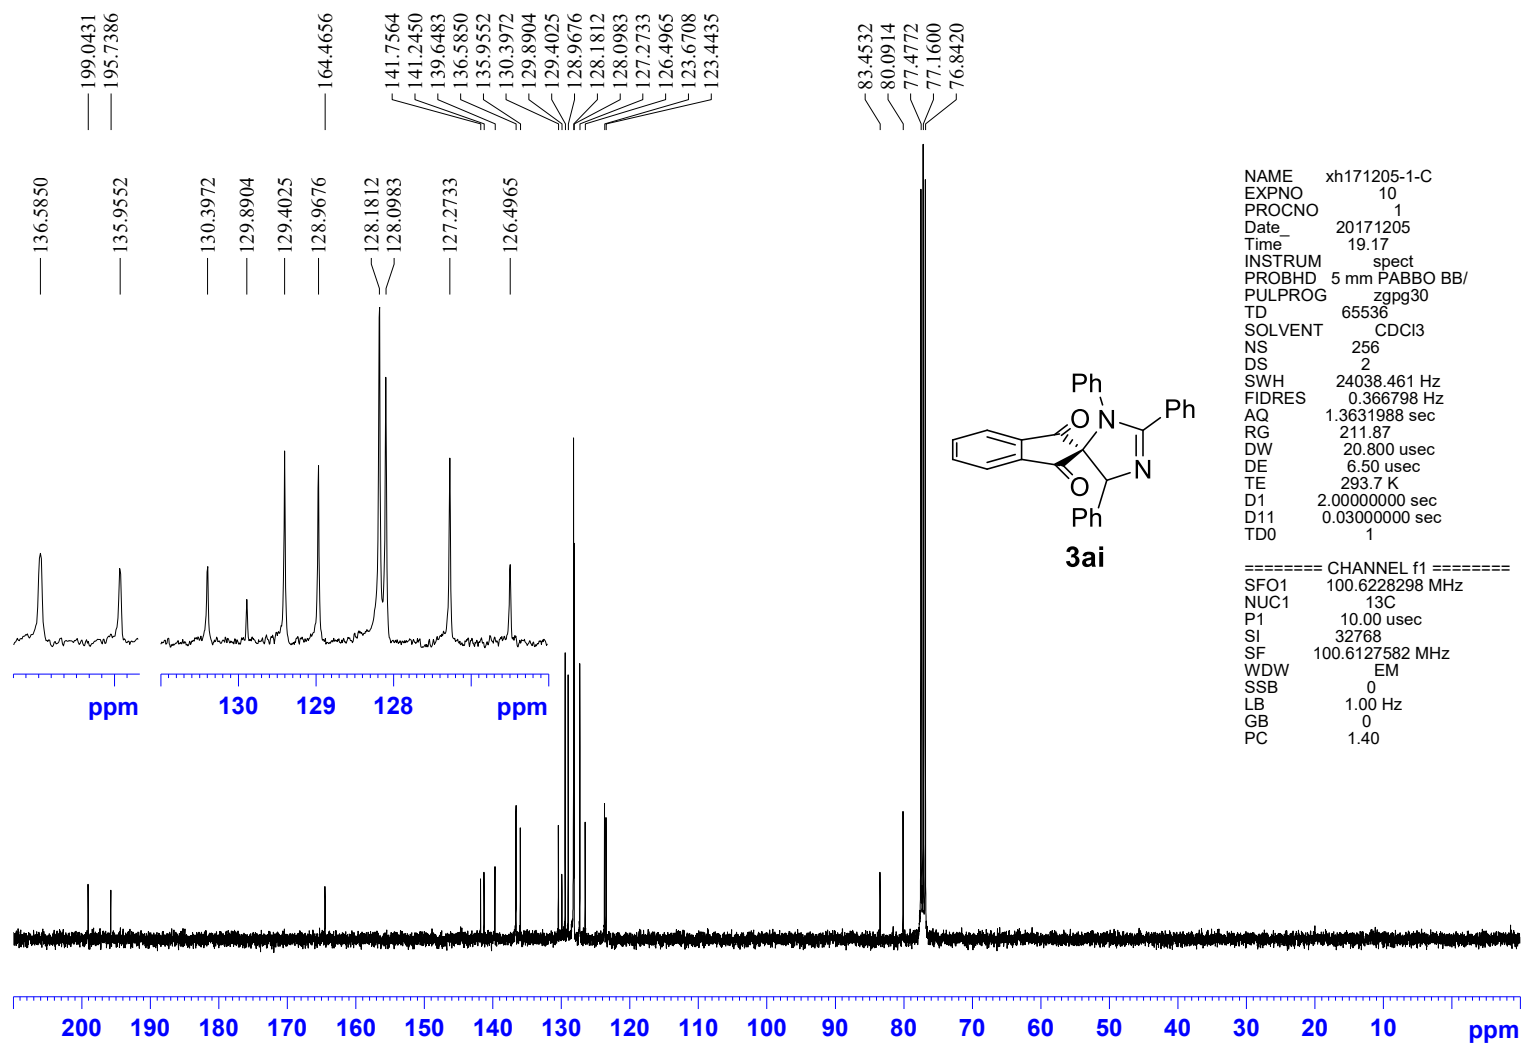

Figure S62. <sup>13</sup>C NMR (101 MHz, CDCl<sub>3</sub>) of compound 3ai

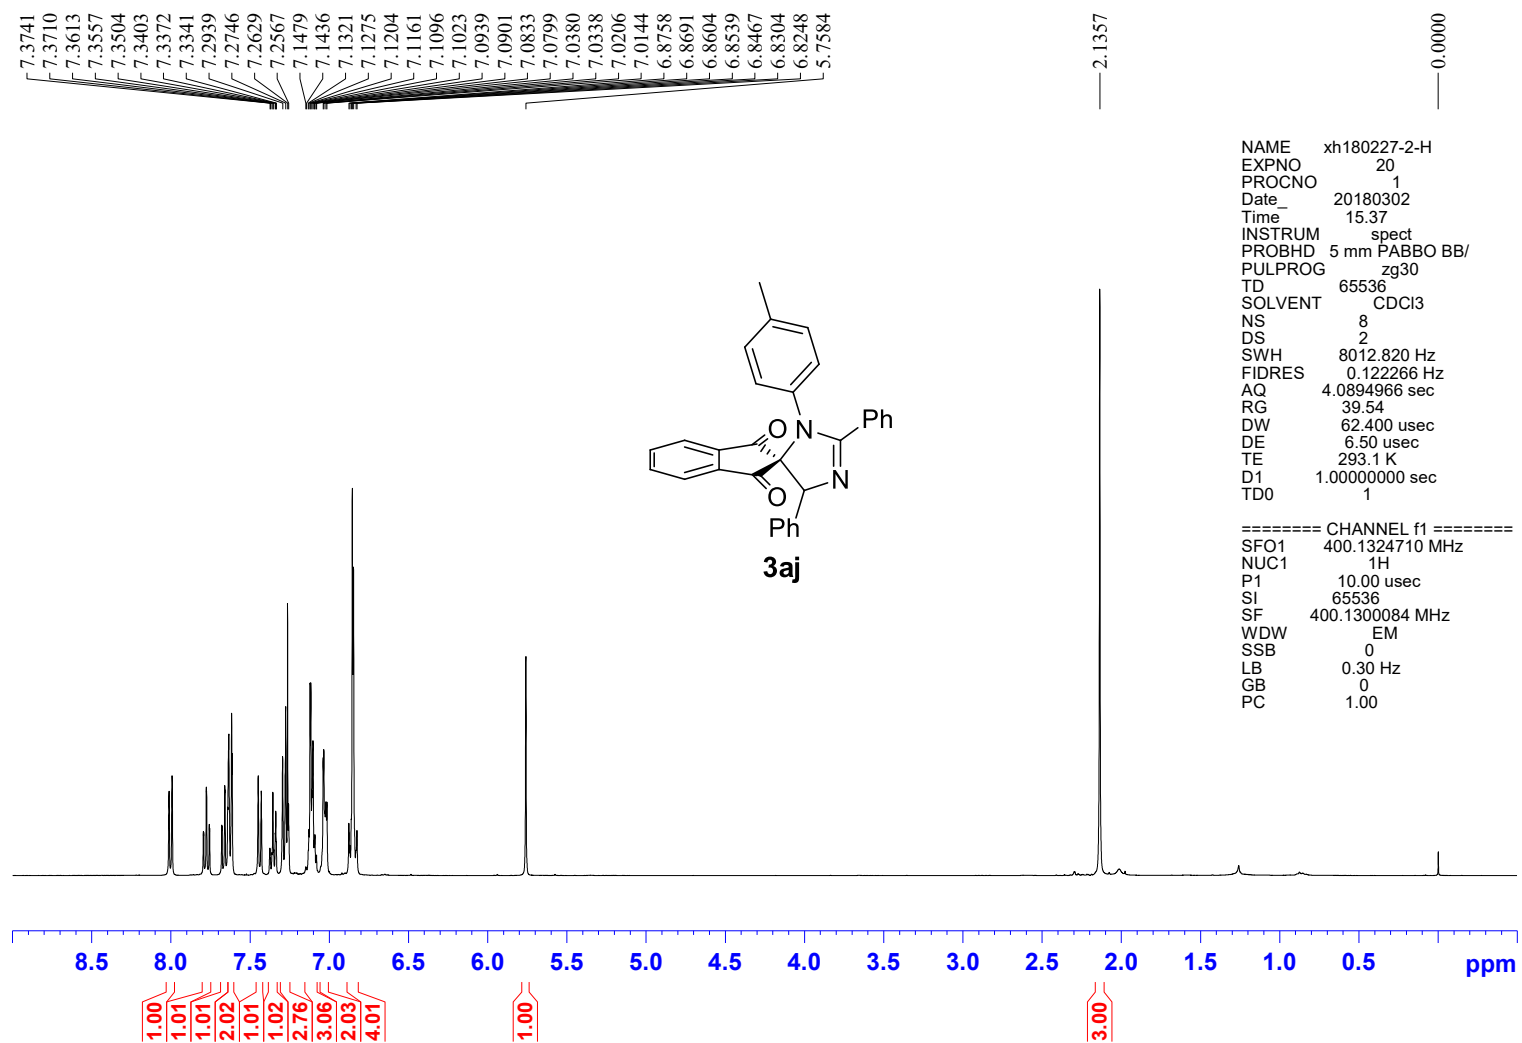

Figure S63.  $^1\text{H}$  NMR (400 MHz,  $\text{CDCl}_3$ ) of compound 3aj

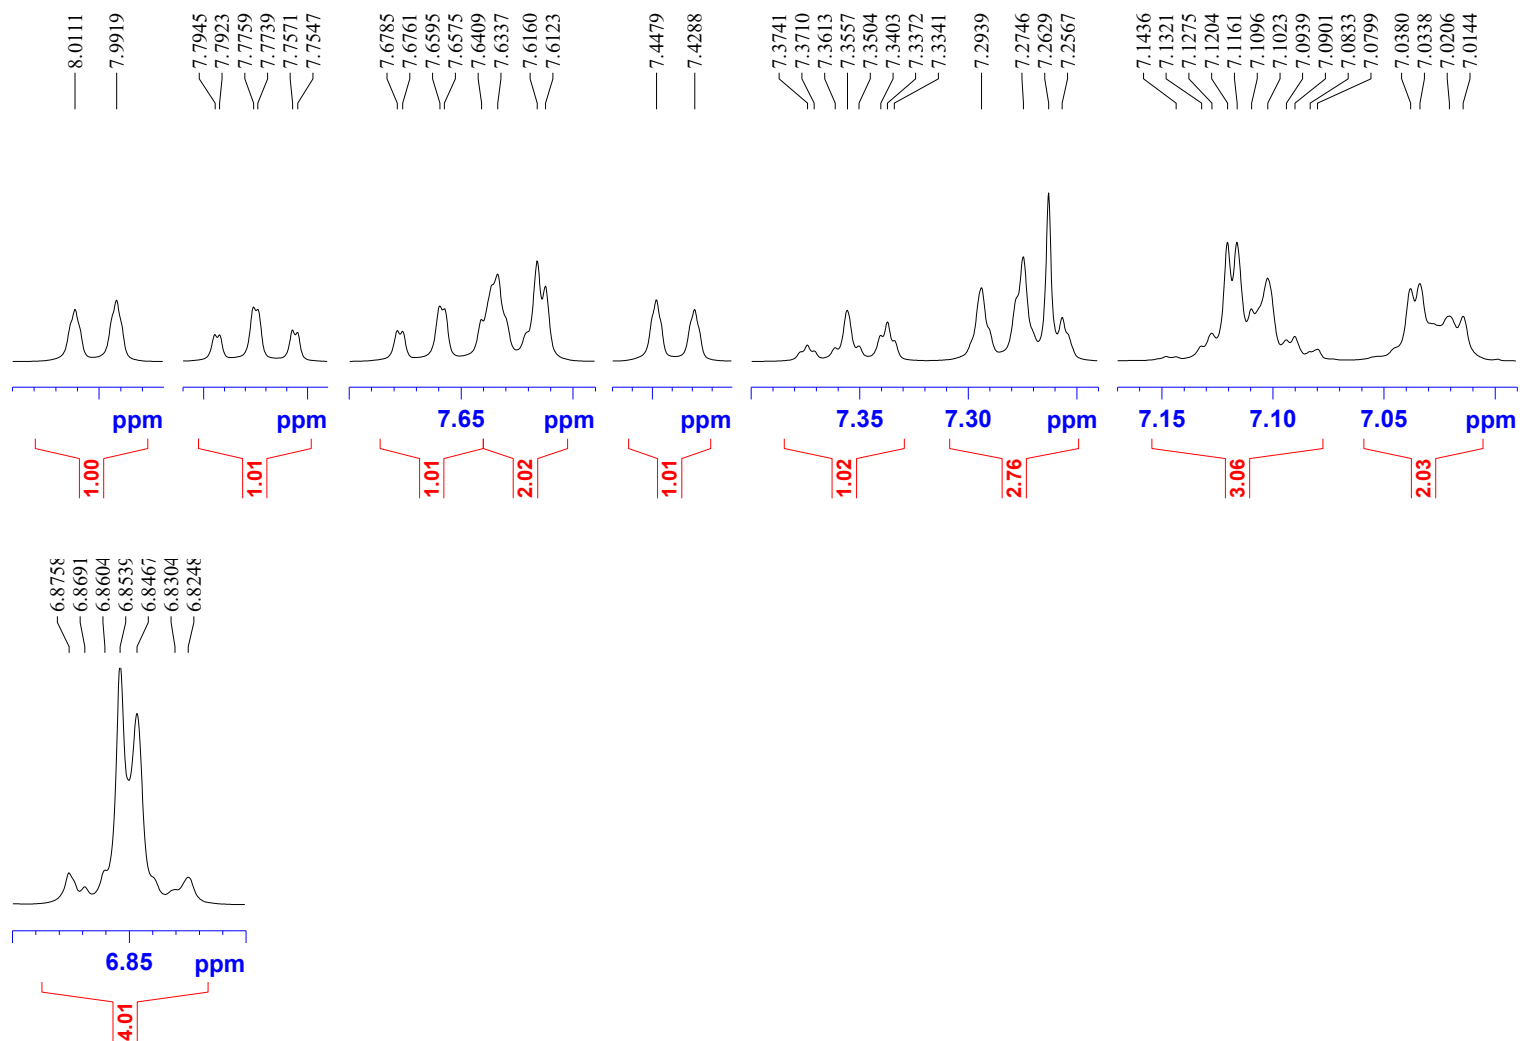

Figure S64. Expanded <sup>1</sup>H NMR (400 MHz, CDCl<sub>3</sub>) of compound 3aj





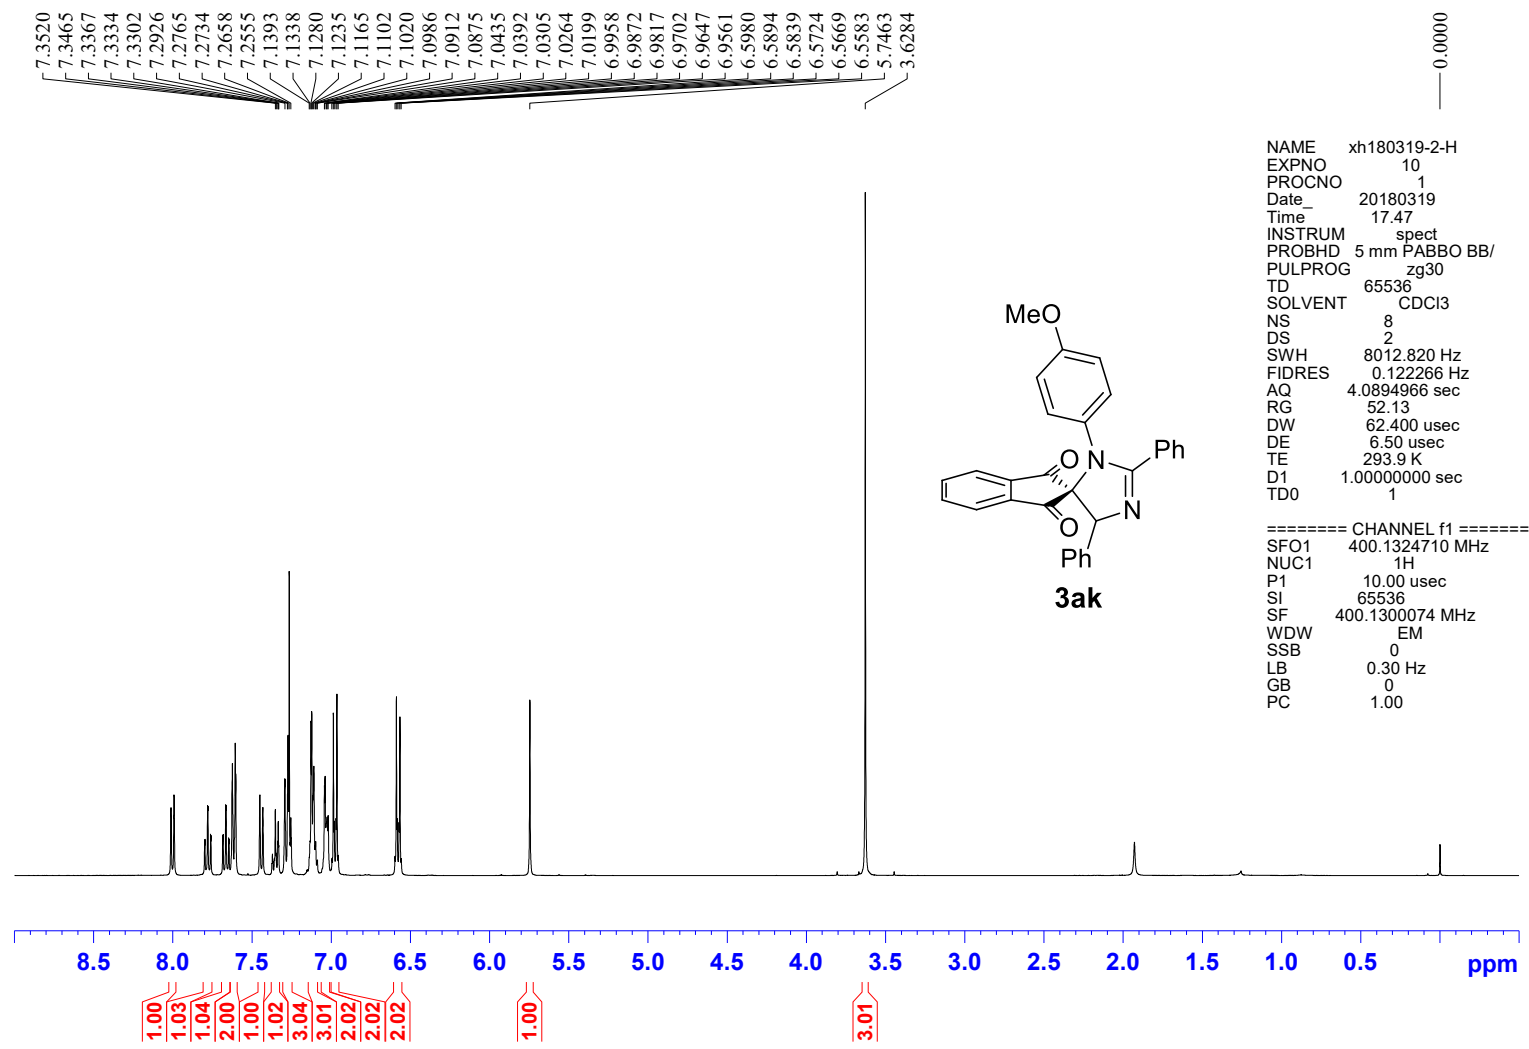

Figure S66. <sup>1</sup>H NMR (400 MHz, CDCl<sub>3</sub>) of compound 3ak

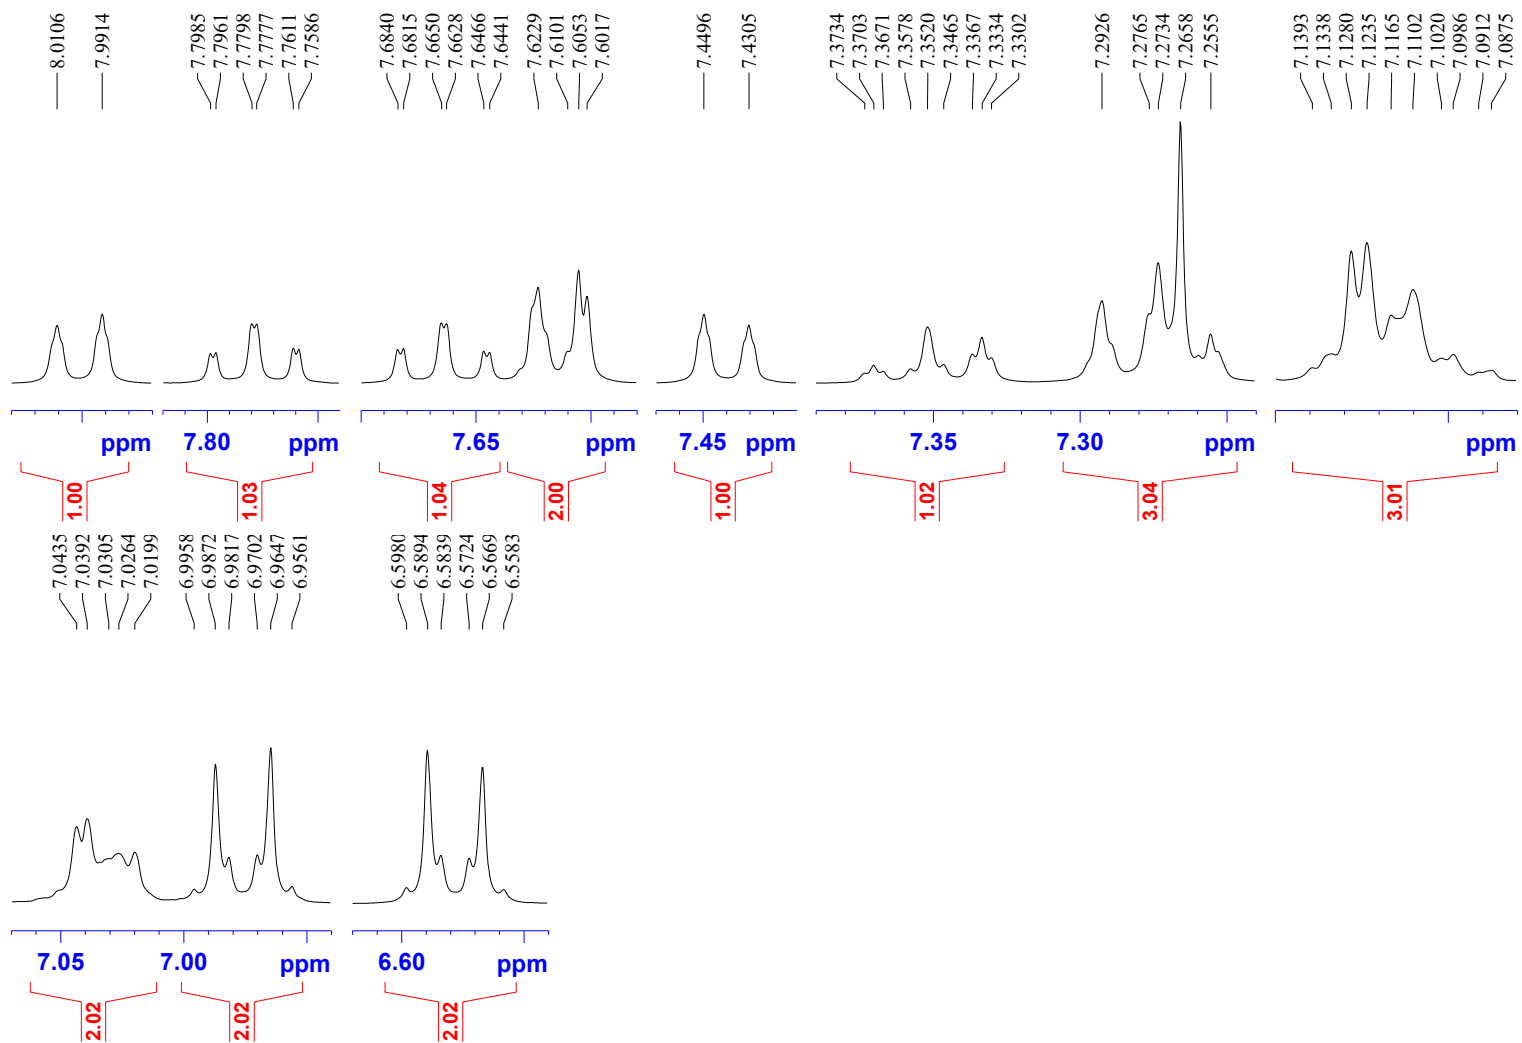

Figure S67. Expanded <sup>1</sup>H NMR (400 MHz, CDCl<sub>3</sub>) of compound 3ak

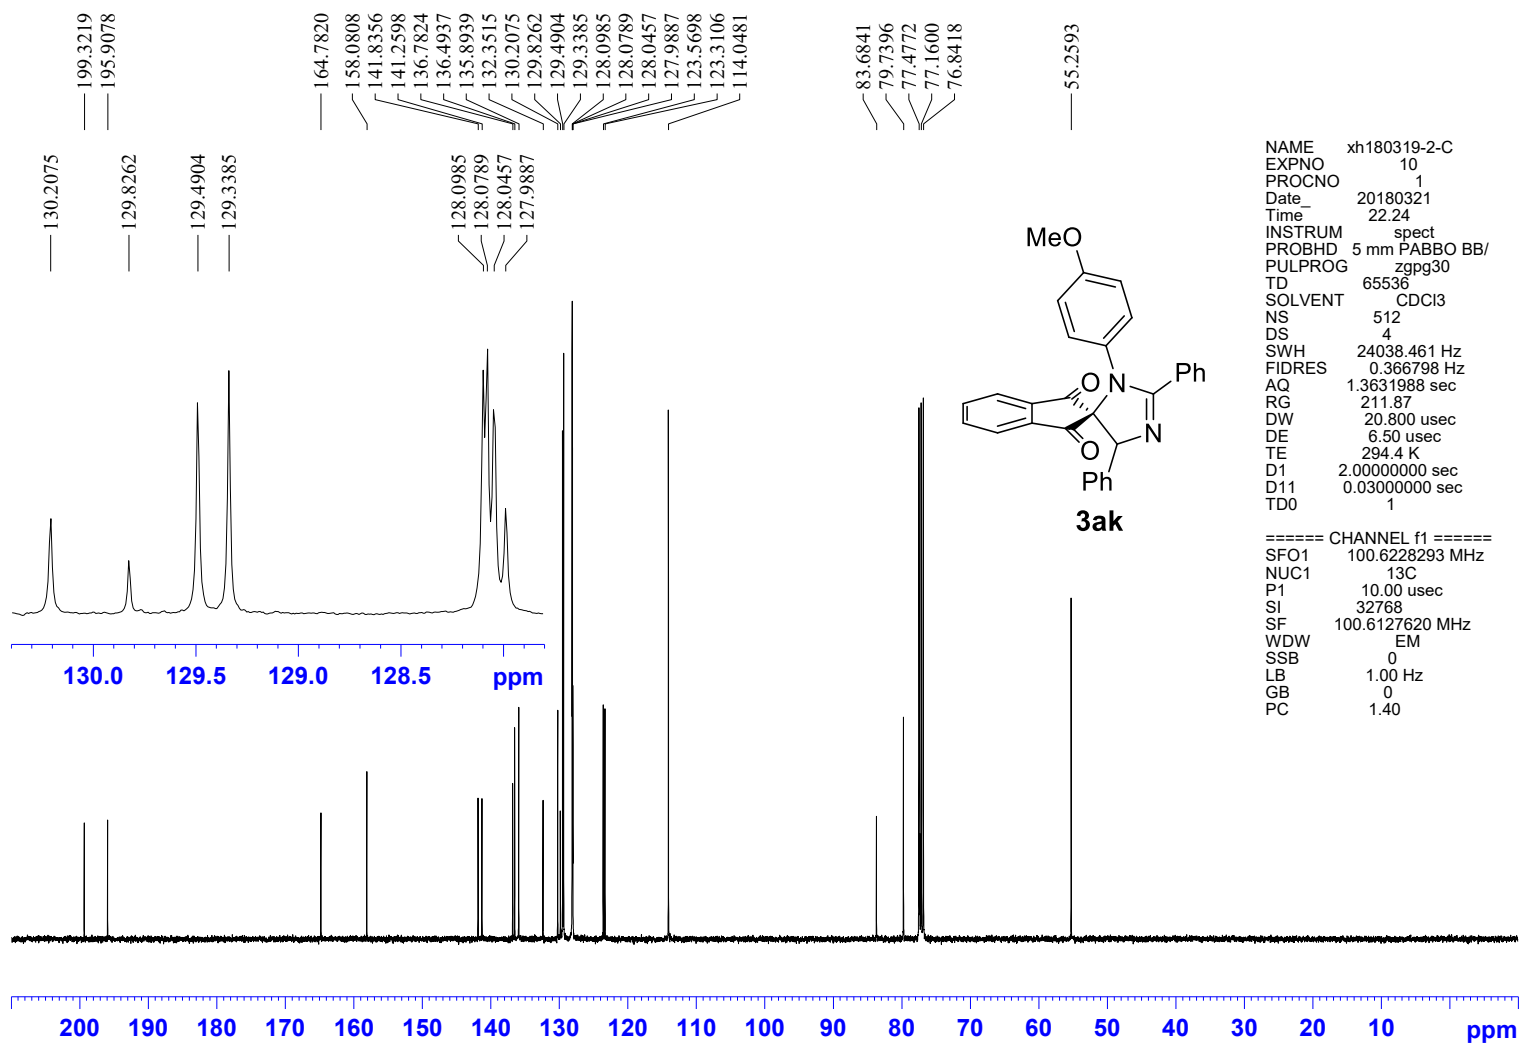

Figure S68. <sup>13</sup>C NMR (101 MHz, CDCl<sub>3</sub>) of compound 3ak

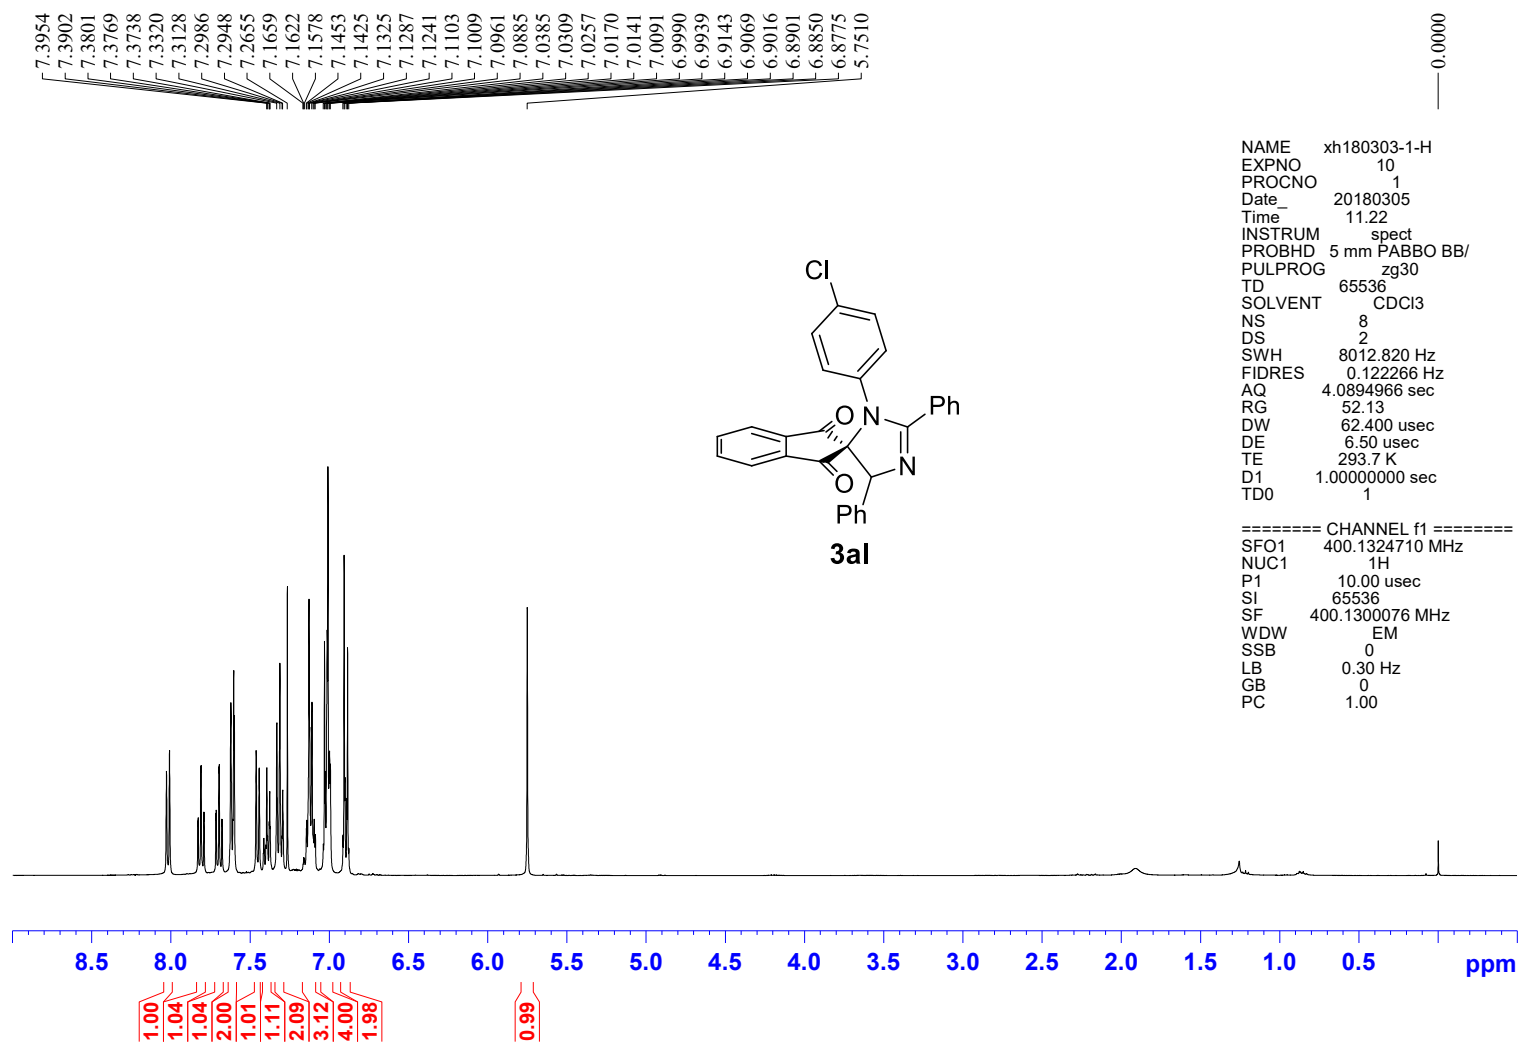

Figure S69.  $^1\text{H}$  NMR (400 MHz,  $\text{CDCl}_3$ ) of compound 3al

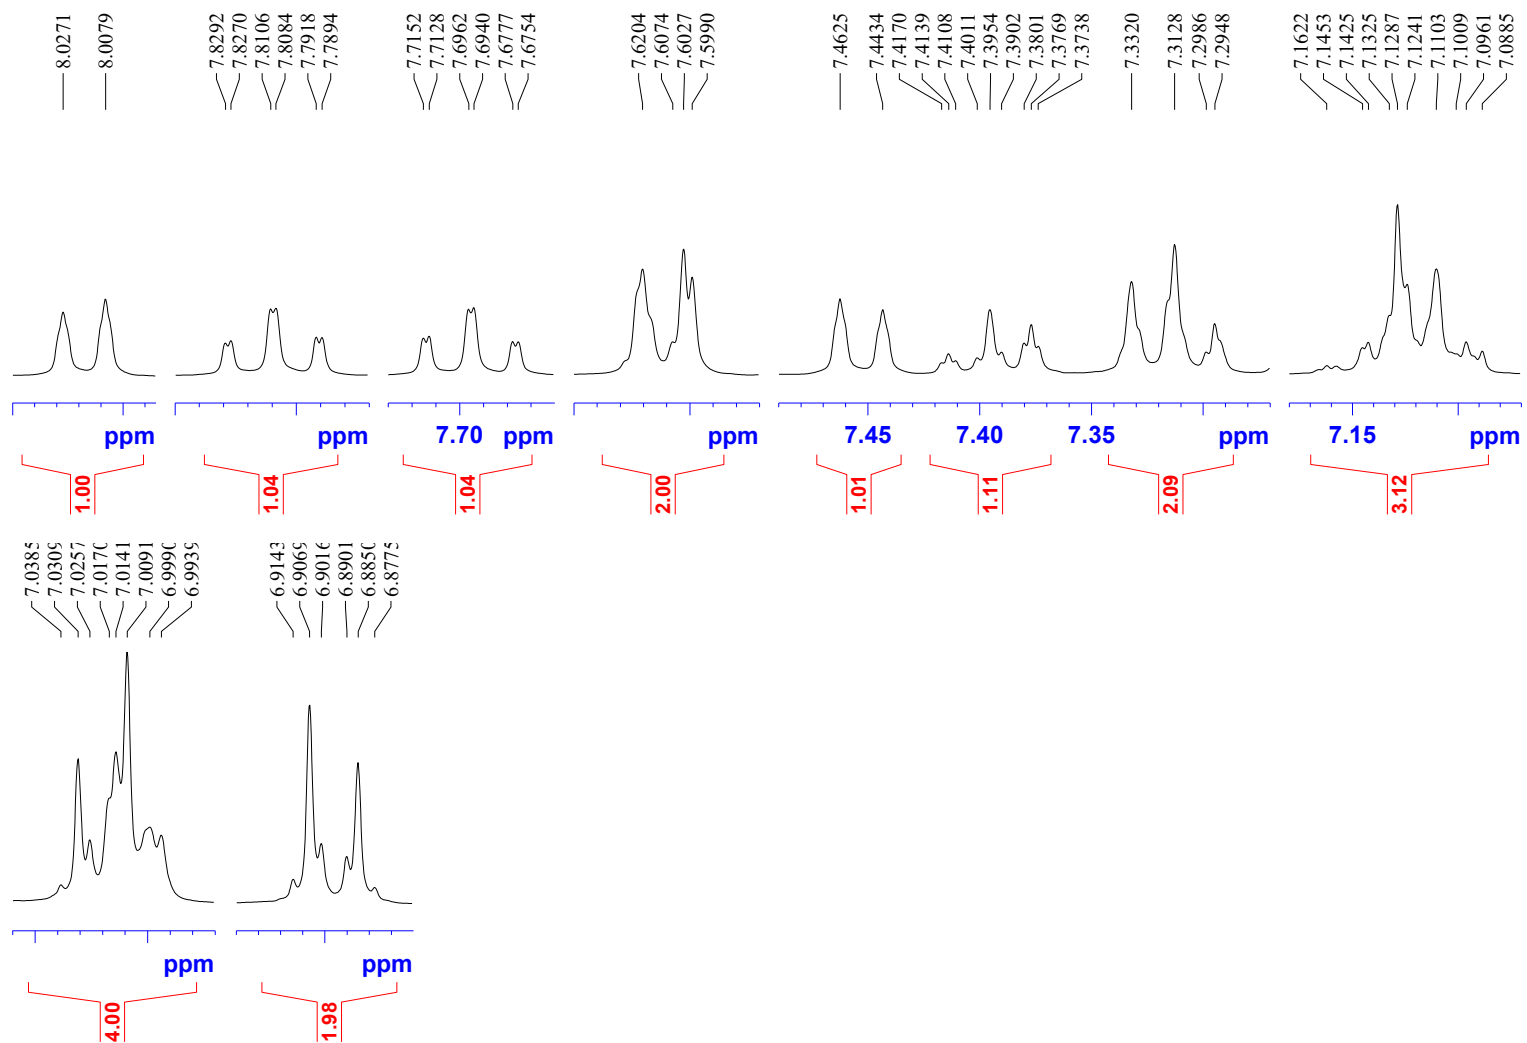

Figure S70. Expanded <sup>1</sup>H NMR (400 MHz, CDCl<sub>3</sub>) of compound 3al

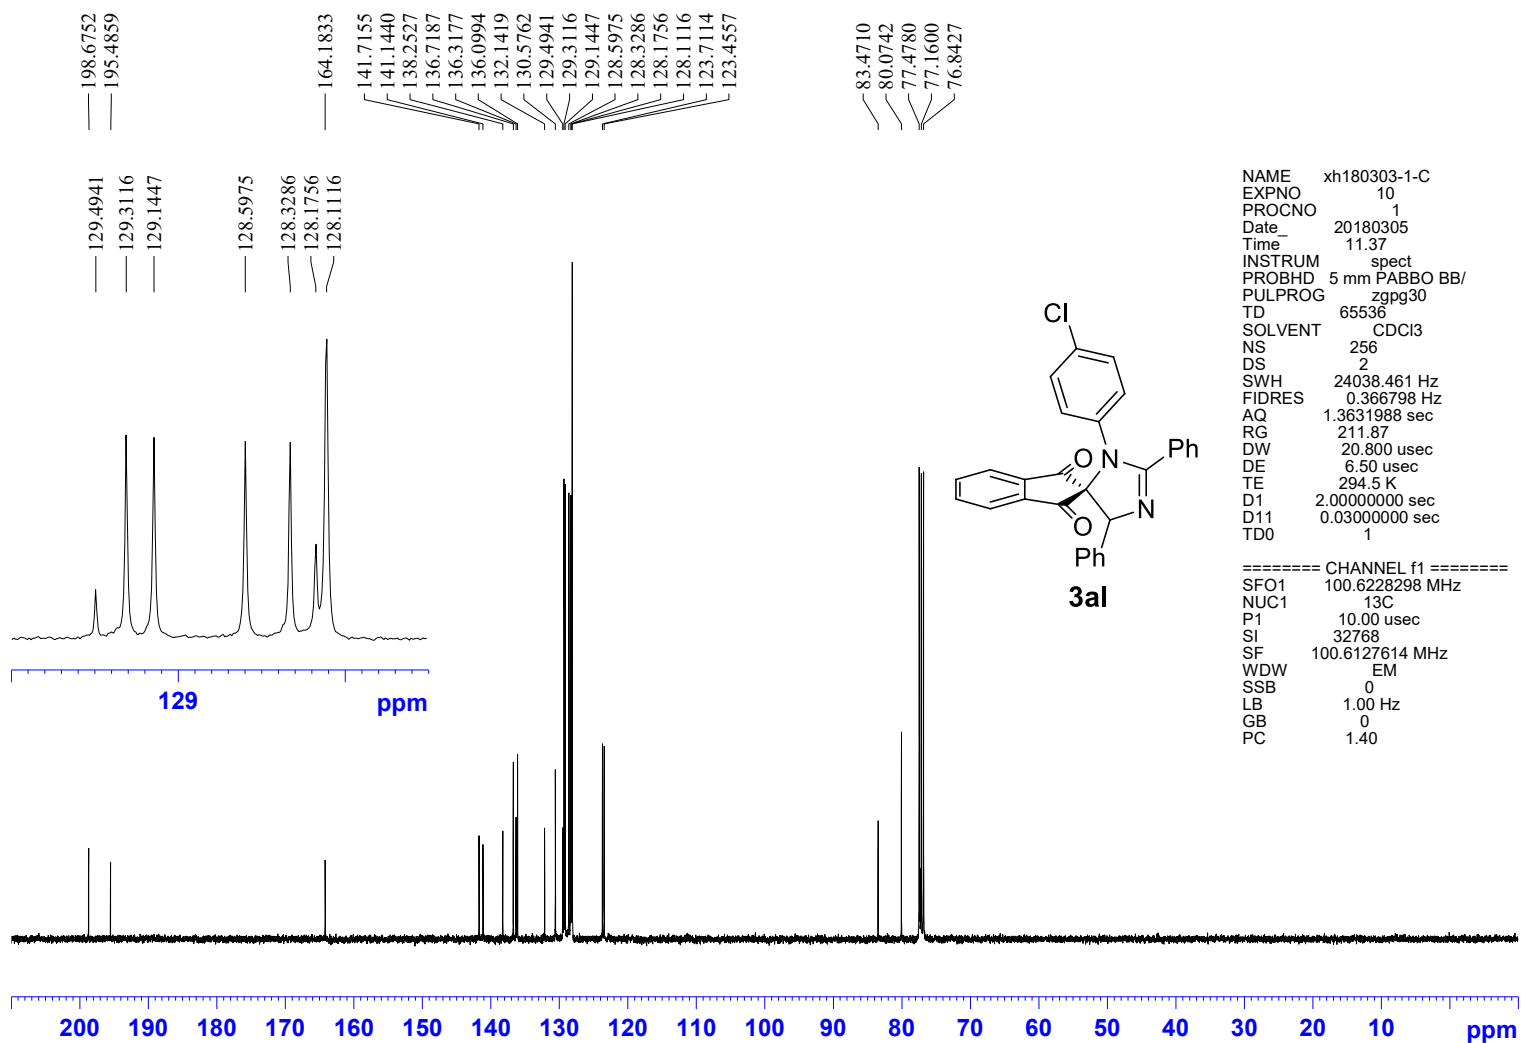

Figure S71. <sup>13</sup>C NMR (101 MHz, CDCl<sub>3</sub>) of compound 3al

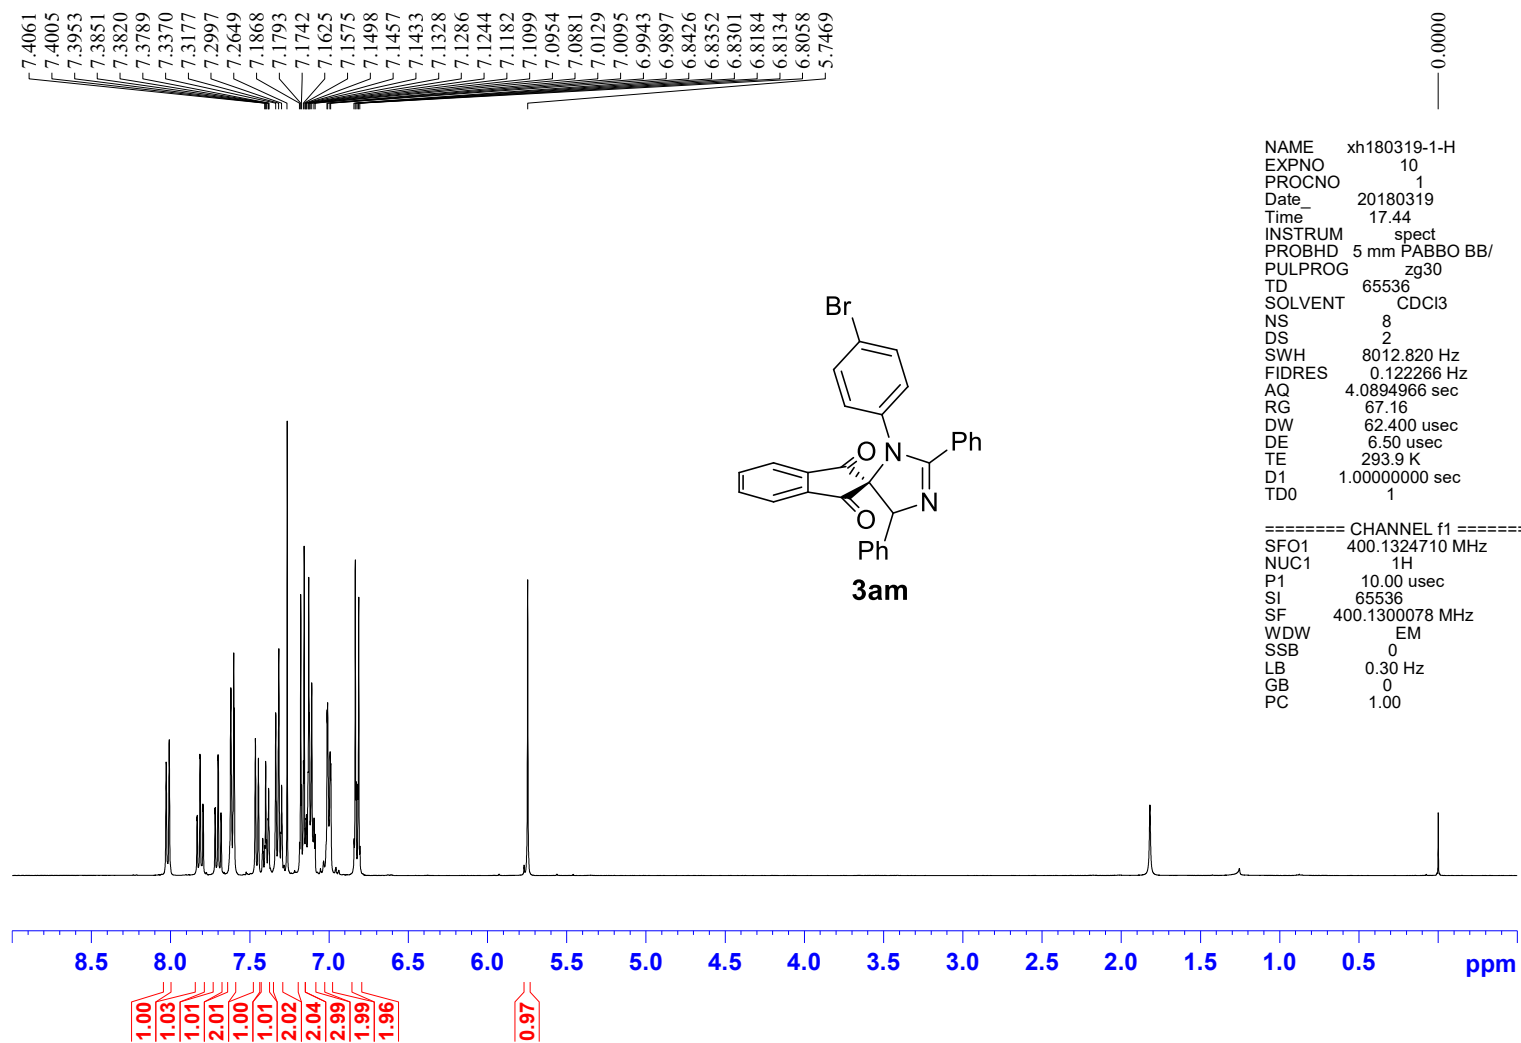

Figure S72. <sup>1</sup>H NMR (400 MHz, CDCl<sub>3</sub>) of compound 3am



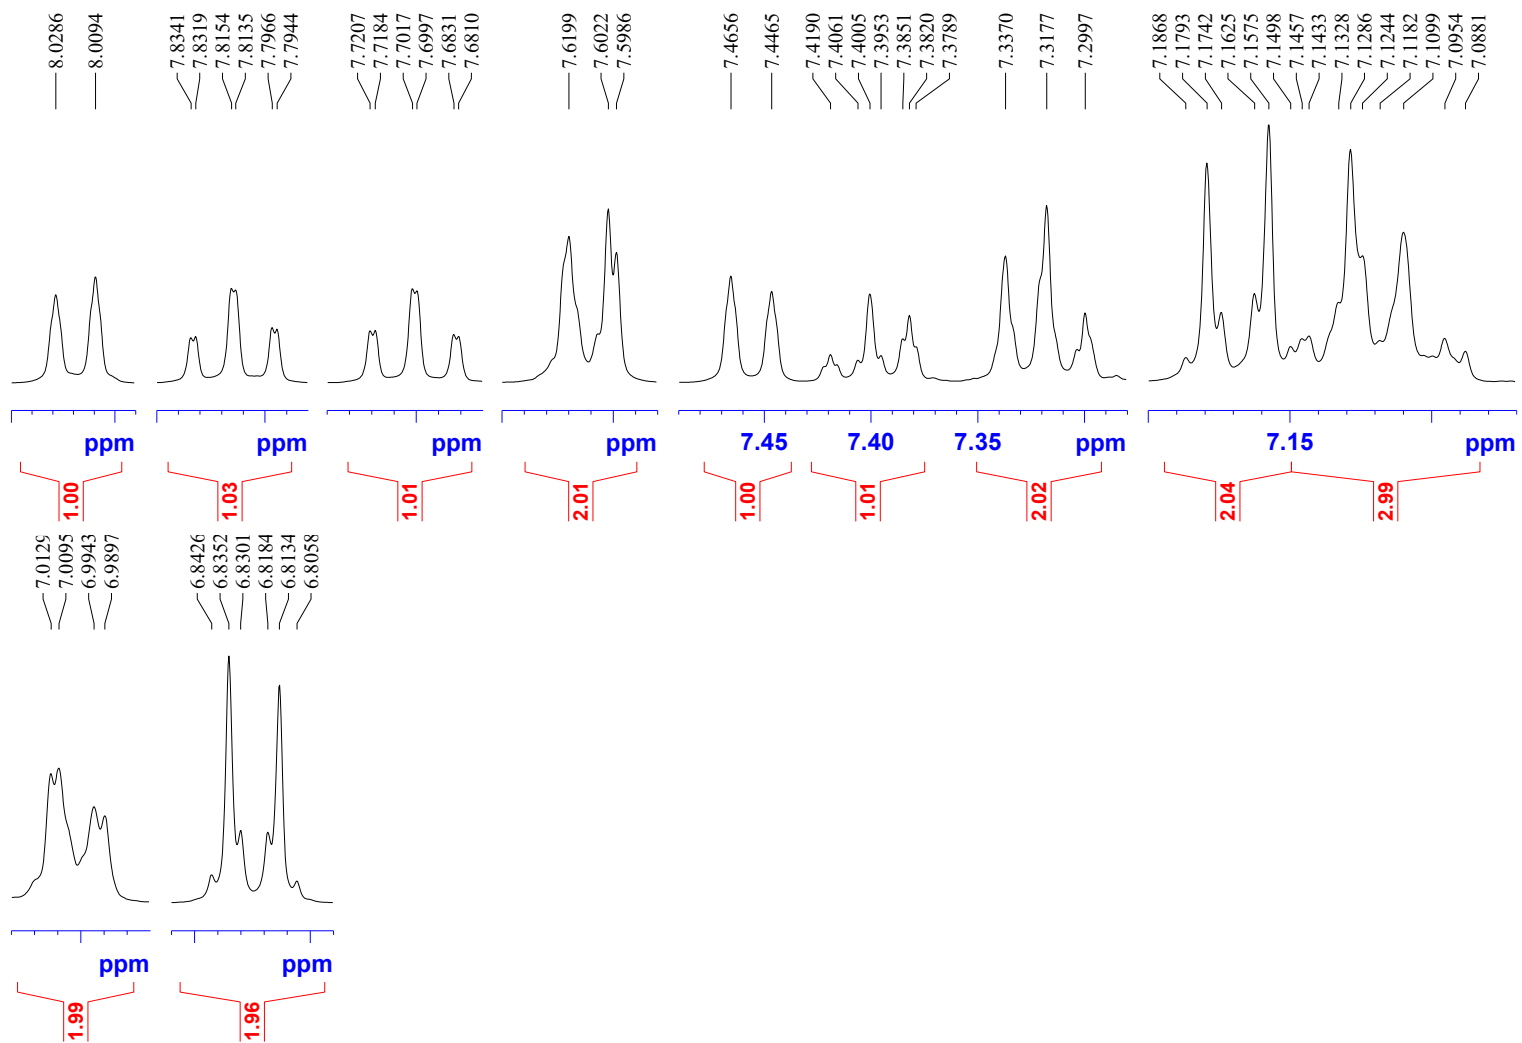

Figure S73. Expanded <sup>1</sup>H NMR (400 MHz, CDCl<sub>3</sub>) of compound 3am

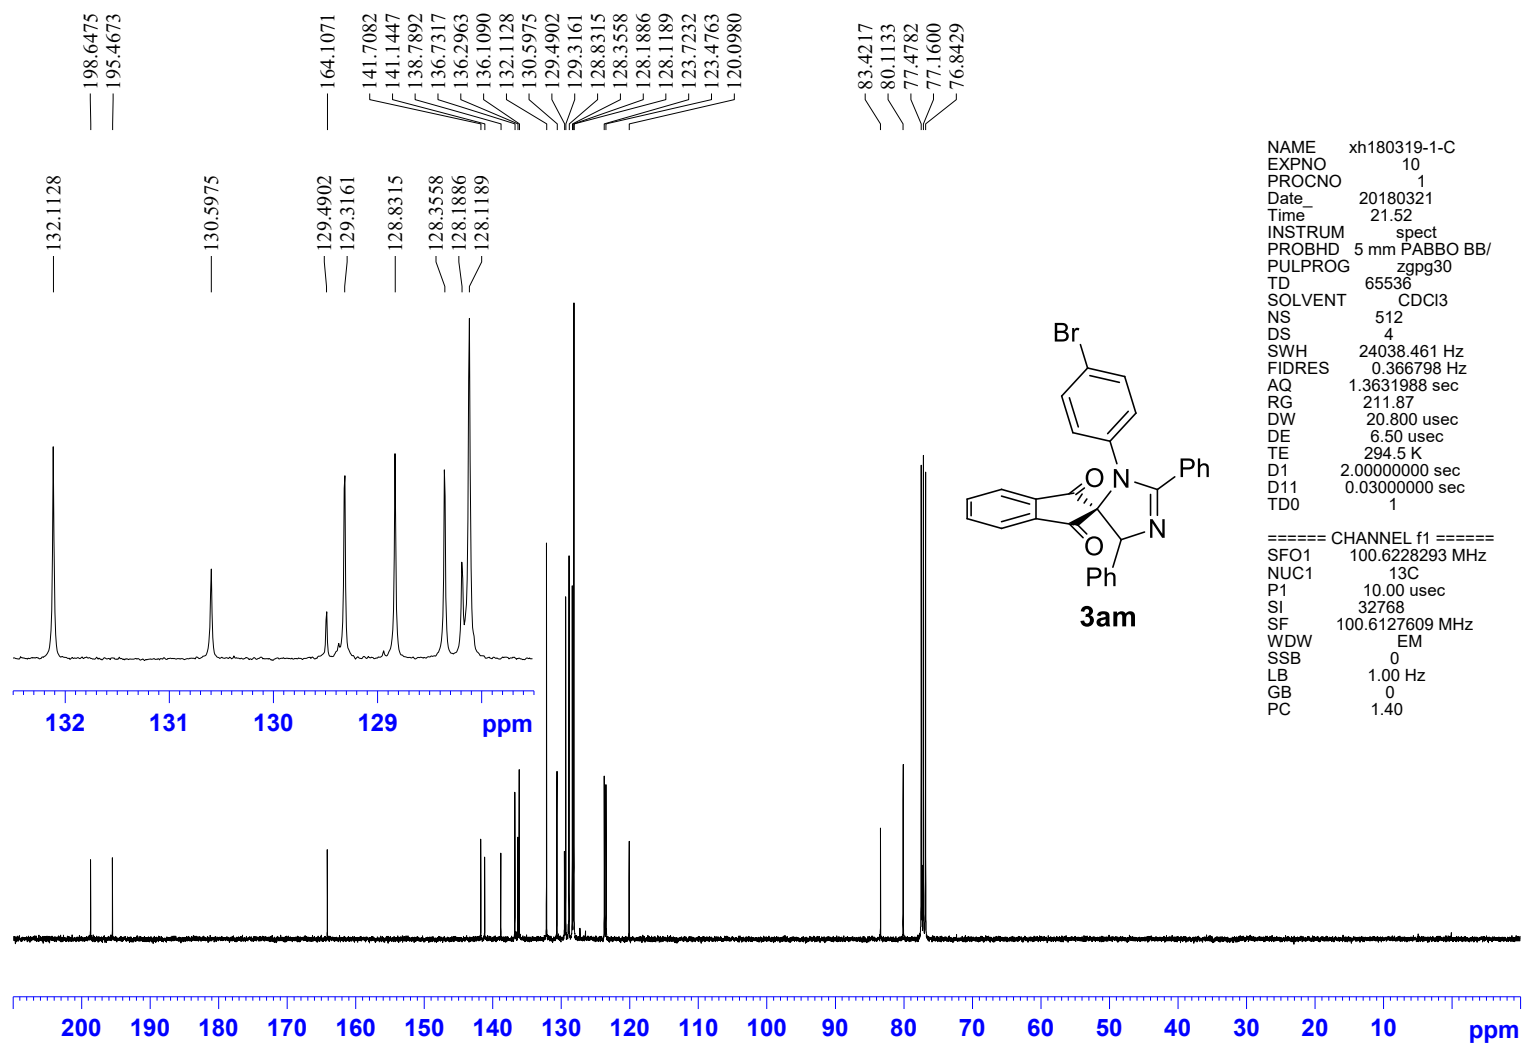

Figure S74. <sup>13</sup>C NMR (101 MHz, CDCl<sub>3</sub>) of compound 3am

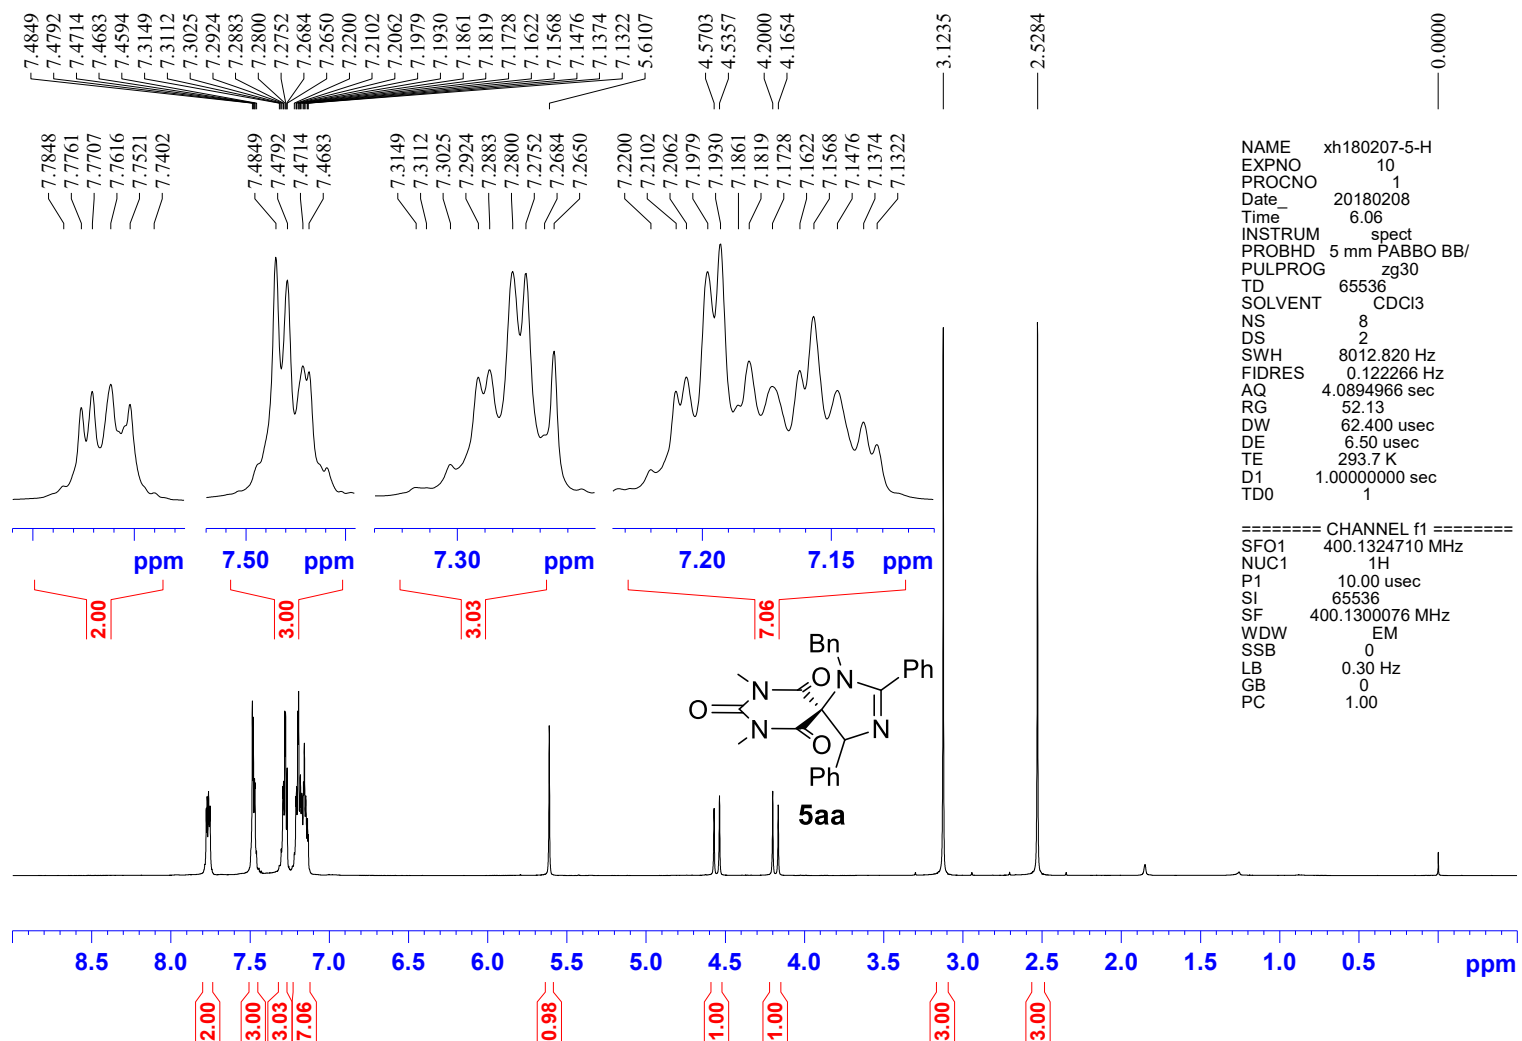

Figure S75. <sup>1</sup>H NMR (400 MHz, CDCl<sub>3</sub>) of compound 5aa

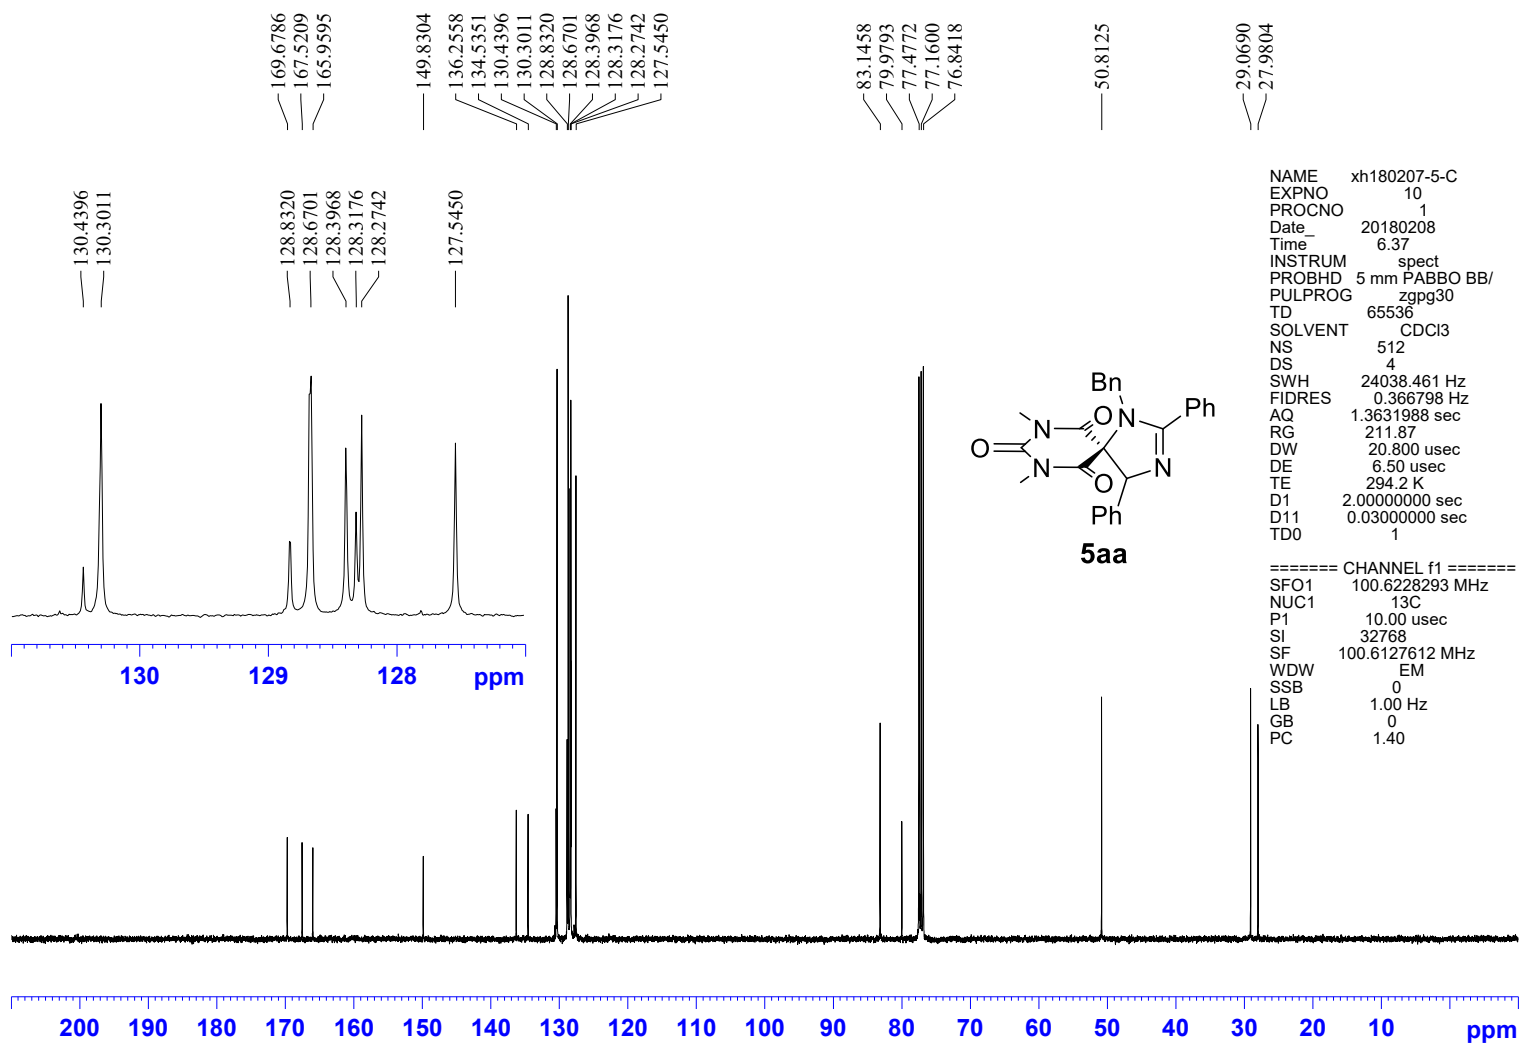

Figure S76. <sup>13</sup>C NMR (101 MHz, CDCl<sub>3</sub>) of compound **5aa**

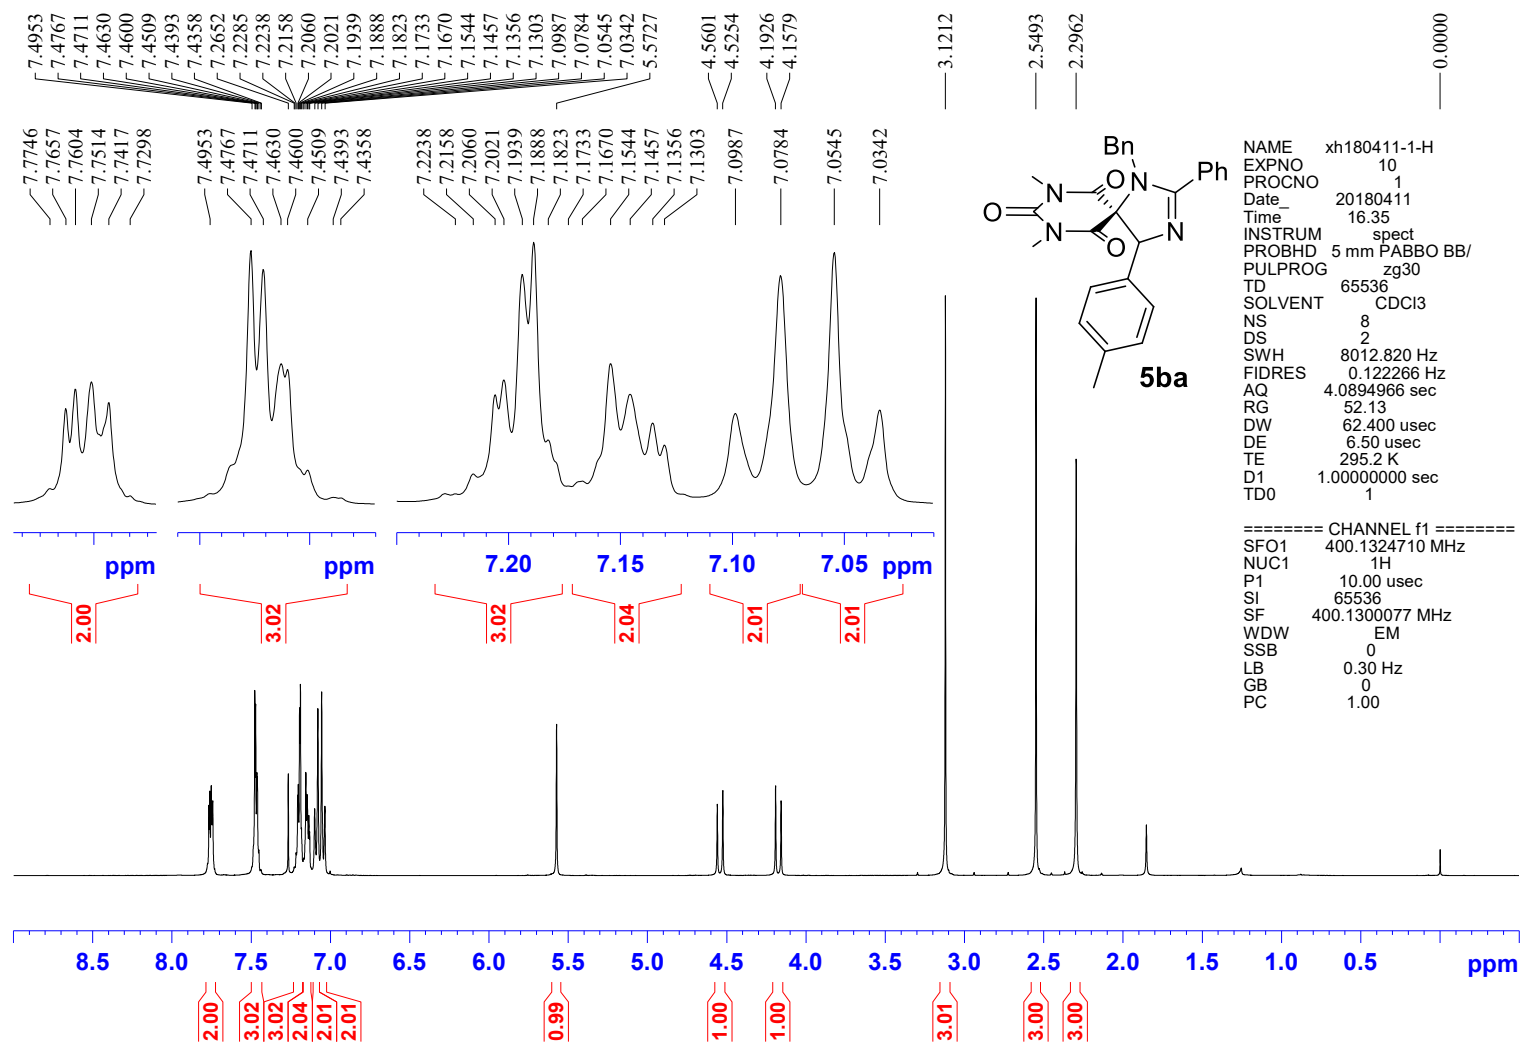

Figure S77. <sup>1</sup>H NMR (400 MHz, CDCl<sub>3</sub>) of compound 5ba

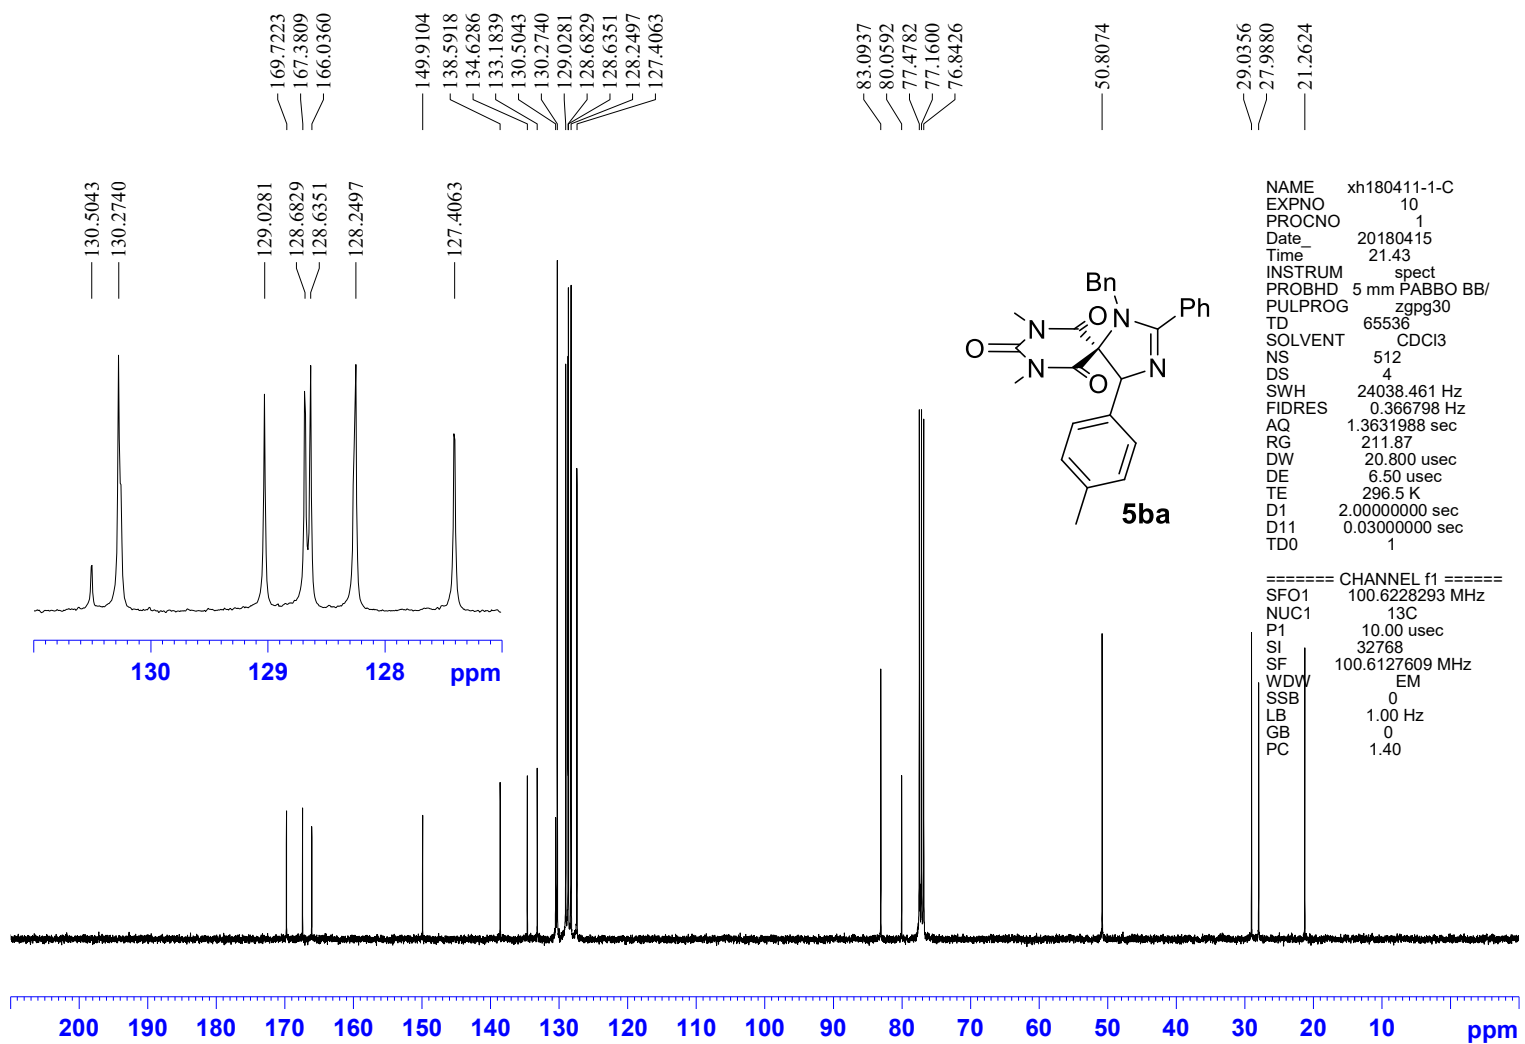

Figure S78. <sup>13</sup>C NMR (101 MHz, CDCl<sub>3</sub>) of compound 5ba



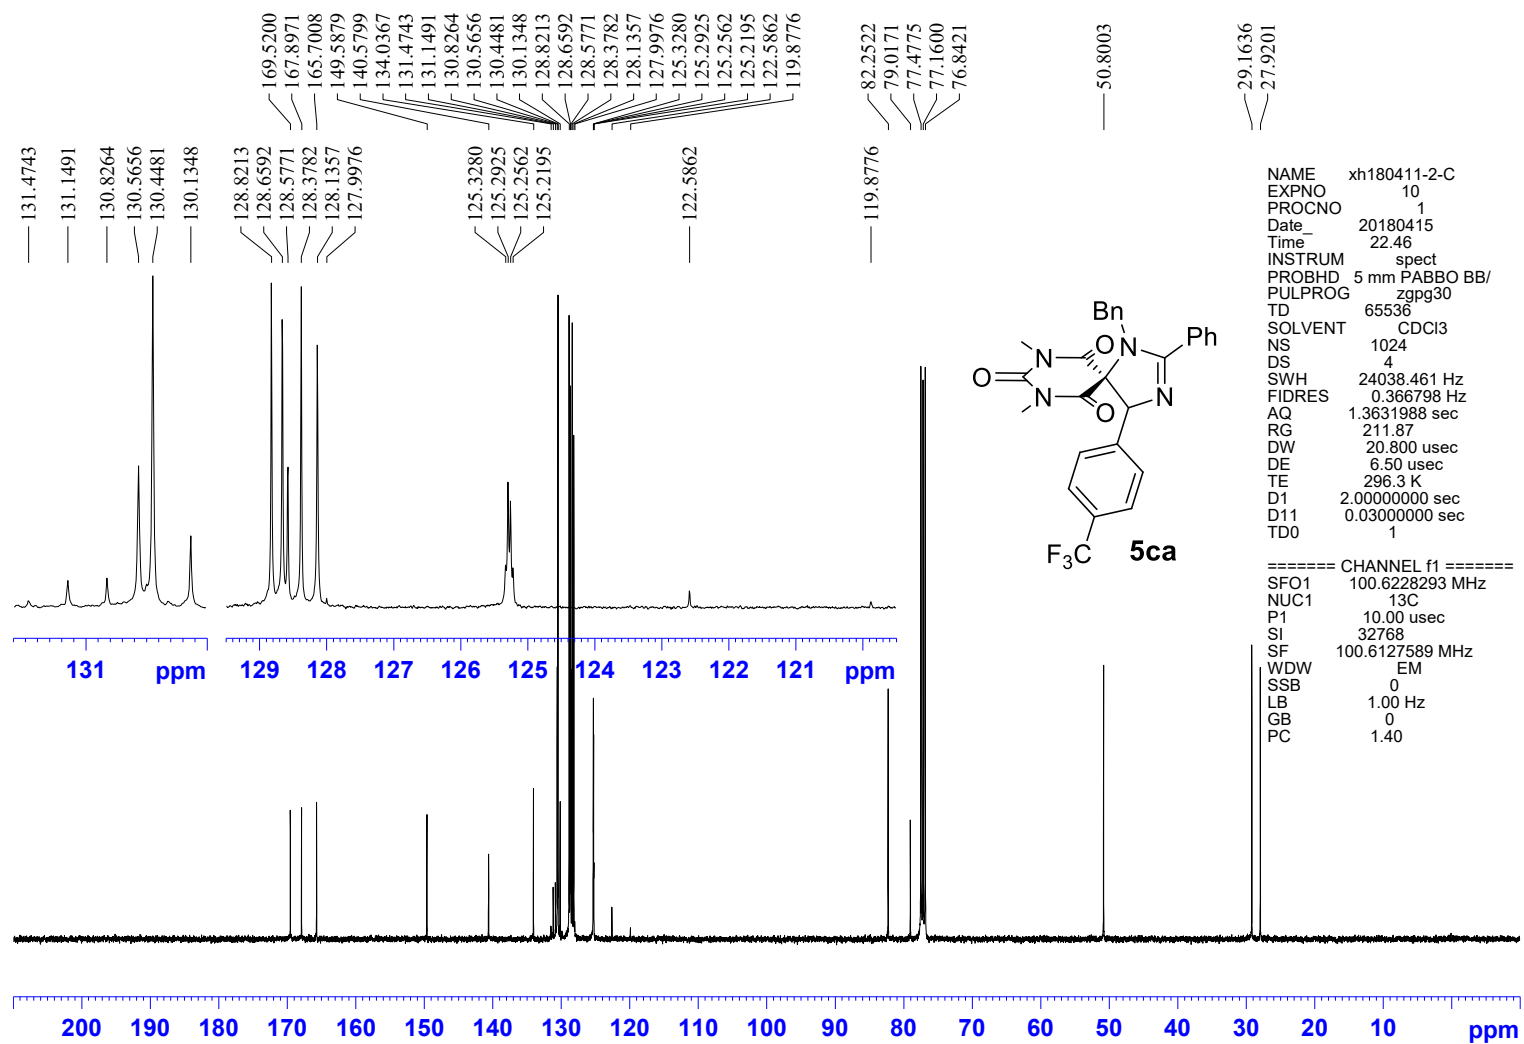

Figure S80. <sup>13</sup>C NMR (101 MHz, CDCl<sub>3</sub>) of compound 5ca



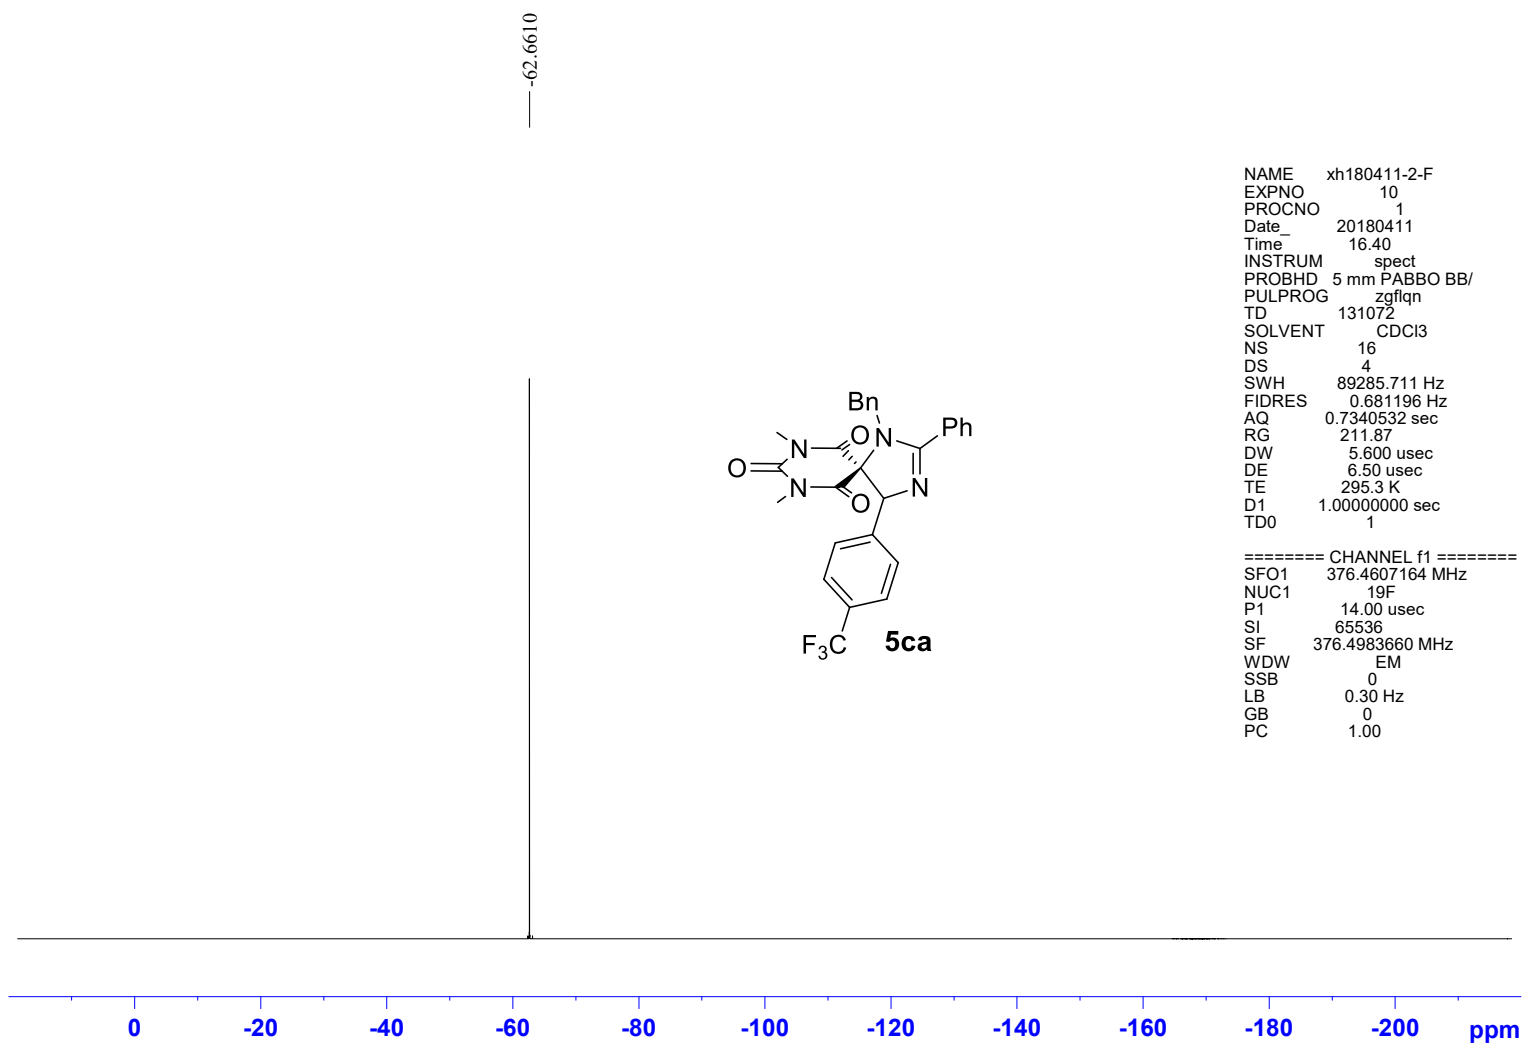

Figure S81.  $^{19}\text{F}$  NMR (376 MHz,  $\text{CDCl}_3$ ) of compound **5ca**



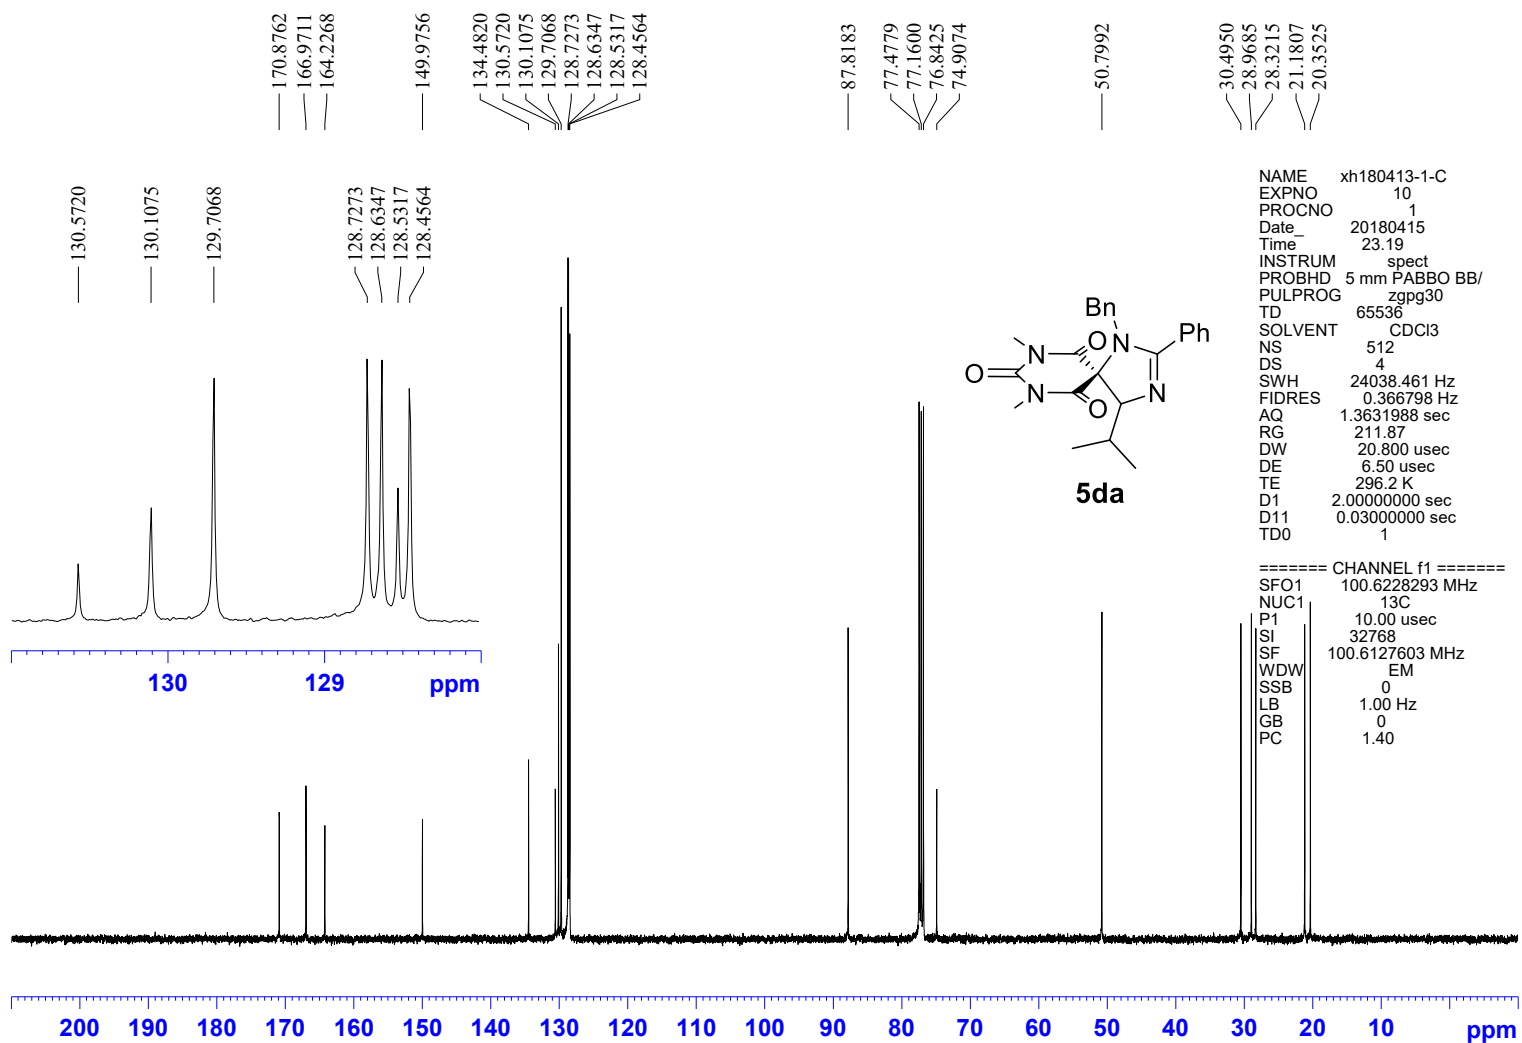

Figure S83. <sup>13</sup>C NMR (101 MHz, CDCl<sub>3</sub>) of compound 5da

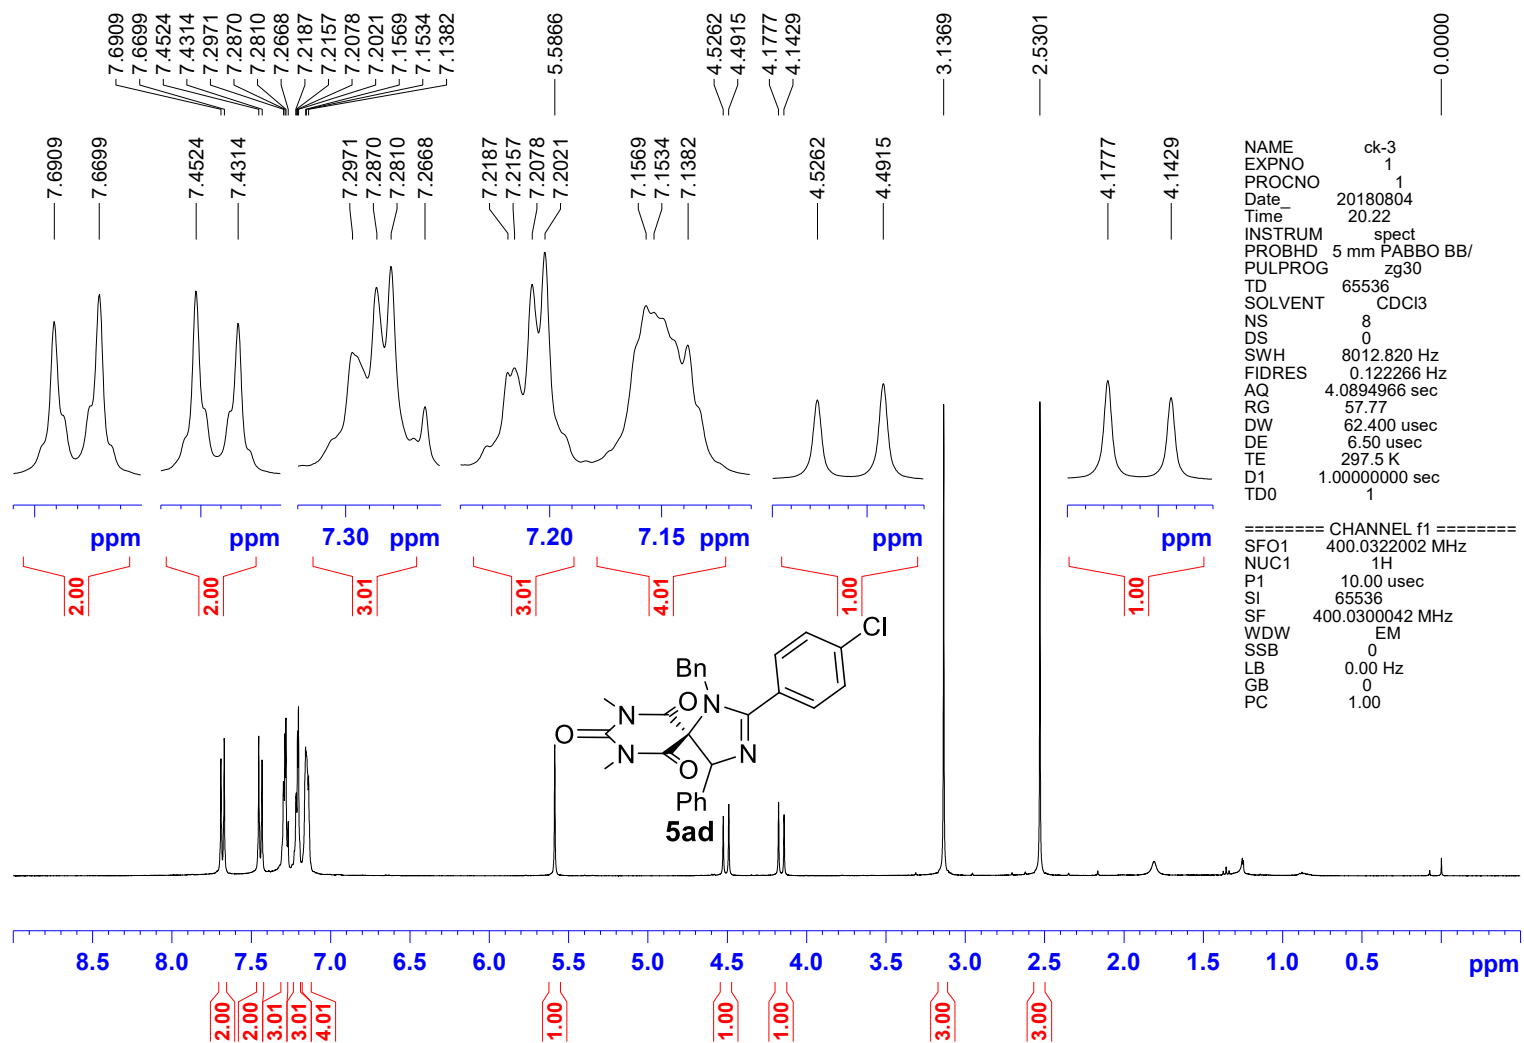

Figure S84. <sup>1</sup>H NMR (400 MHz, CDCl<sub>3</sub>) of compound 5ad

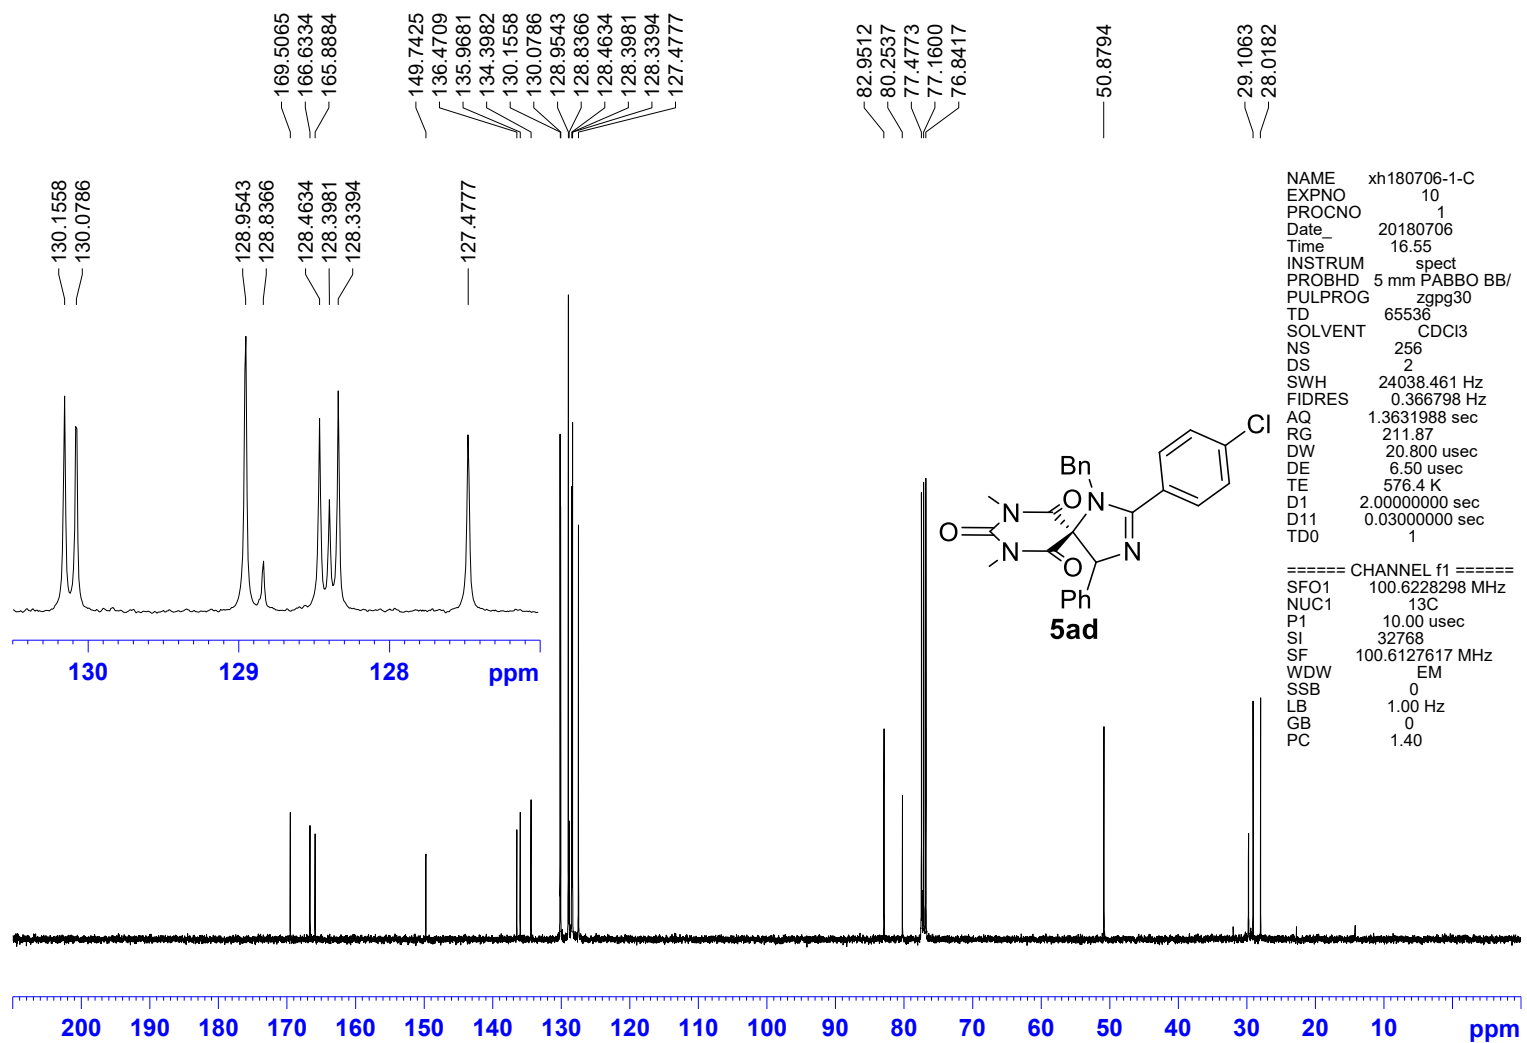

Figure S85.  $^{13}\text{C}$  NMR (101 MHz,  $\text{CDCl}_3$ ) of compound 5ad

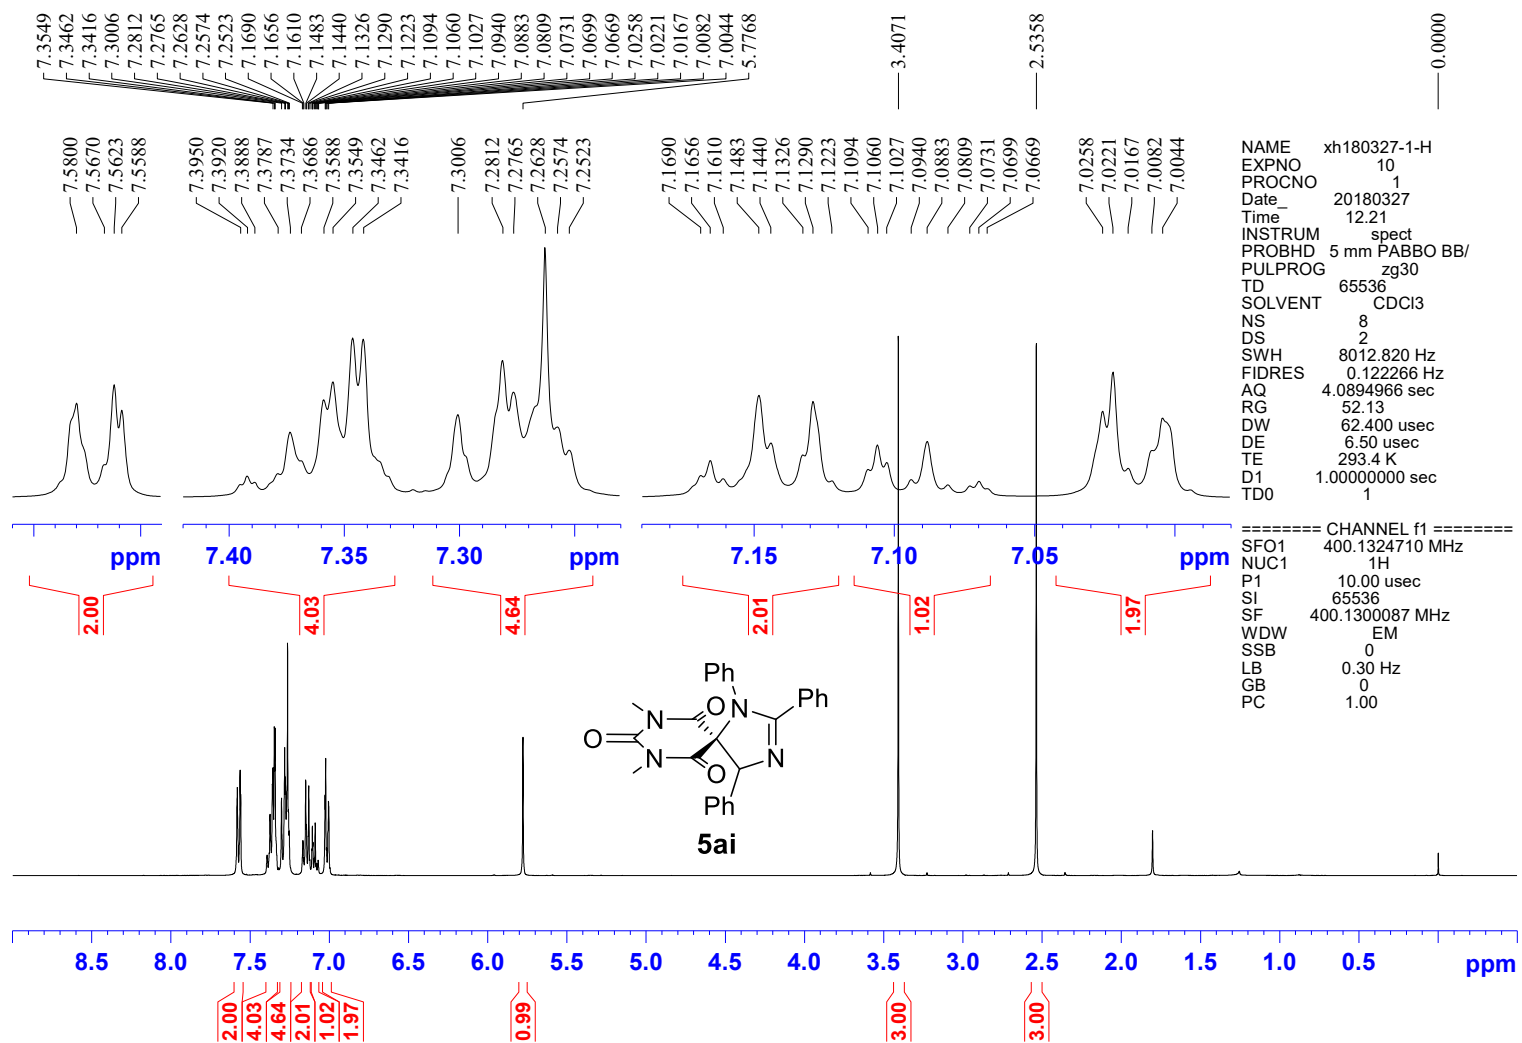

Figure S86.  $^1\text{H}$  NMR (400 MHz,  $\text{CDCl}_3$ ) of compound 5ai

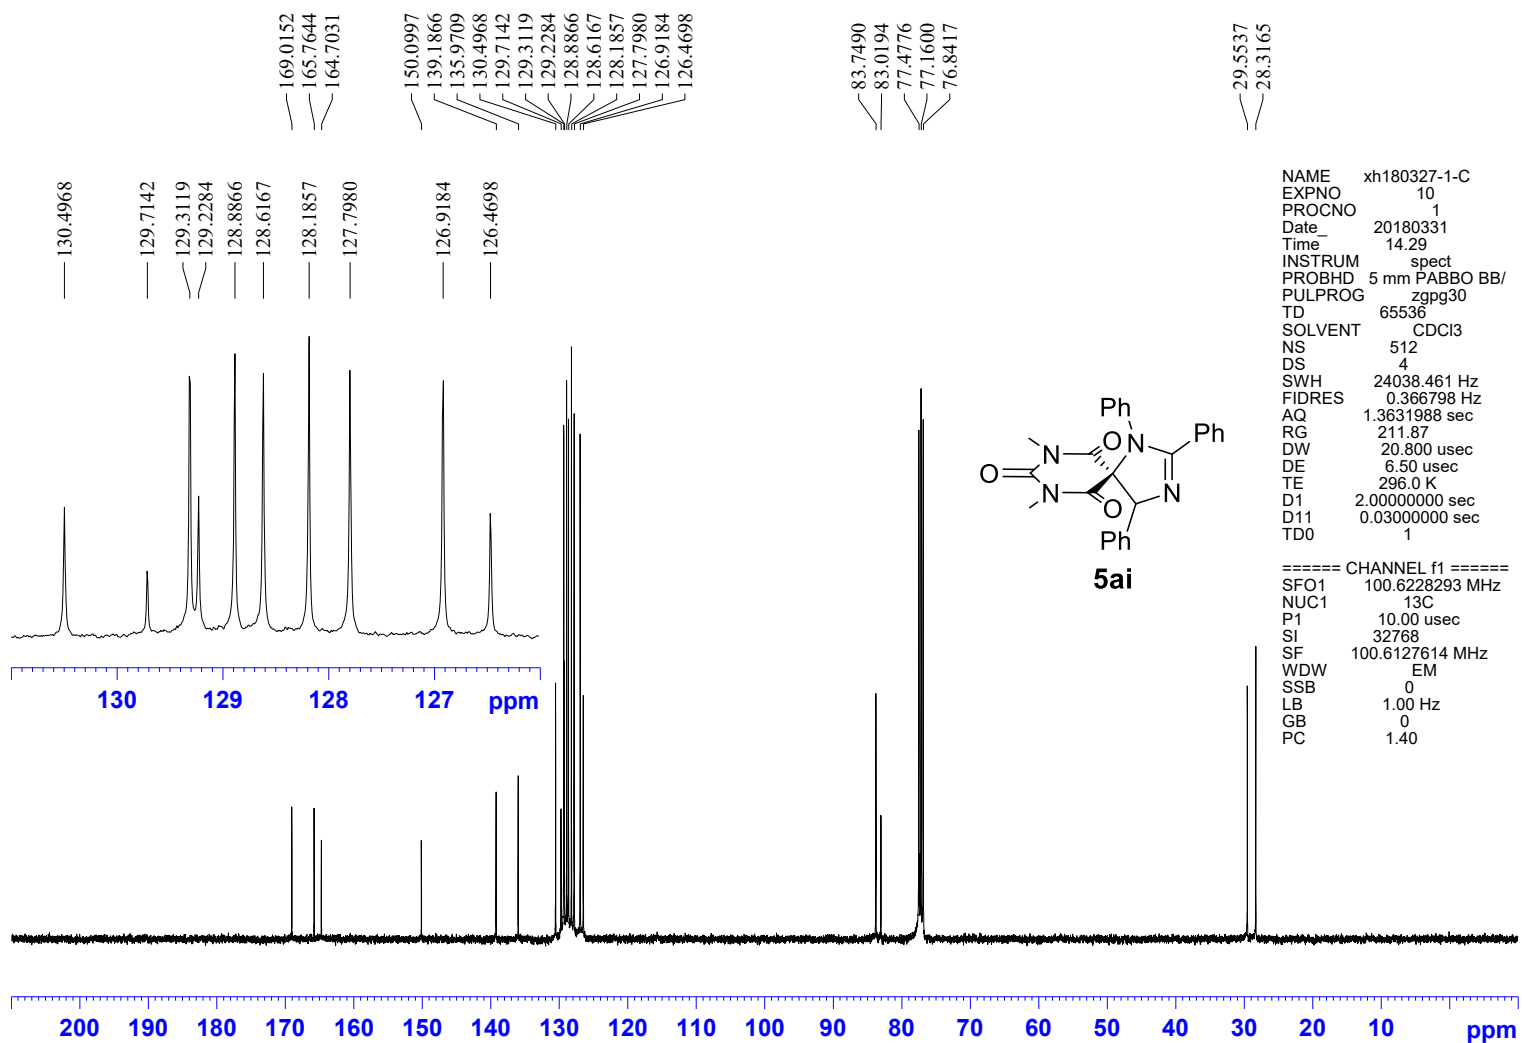

Figure S87.  $^{13}\text{C}$  NMR (101 MHz,  $\text{CDCl}_3$ ) of compound 5ai

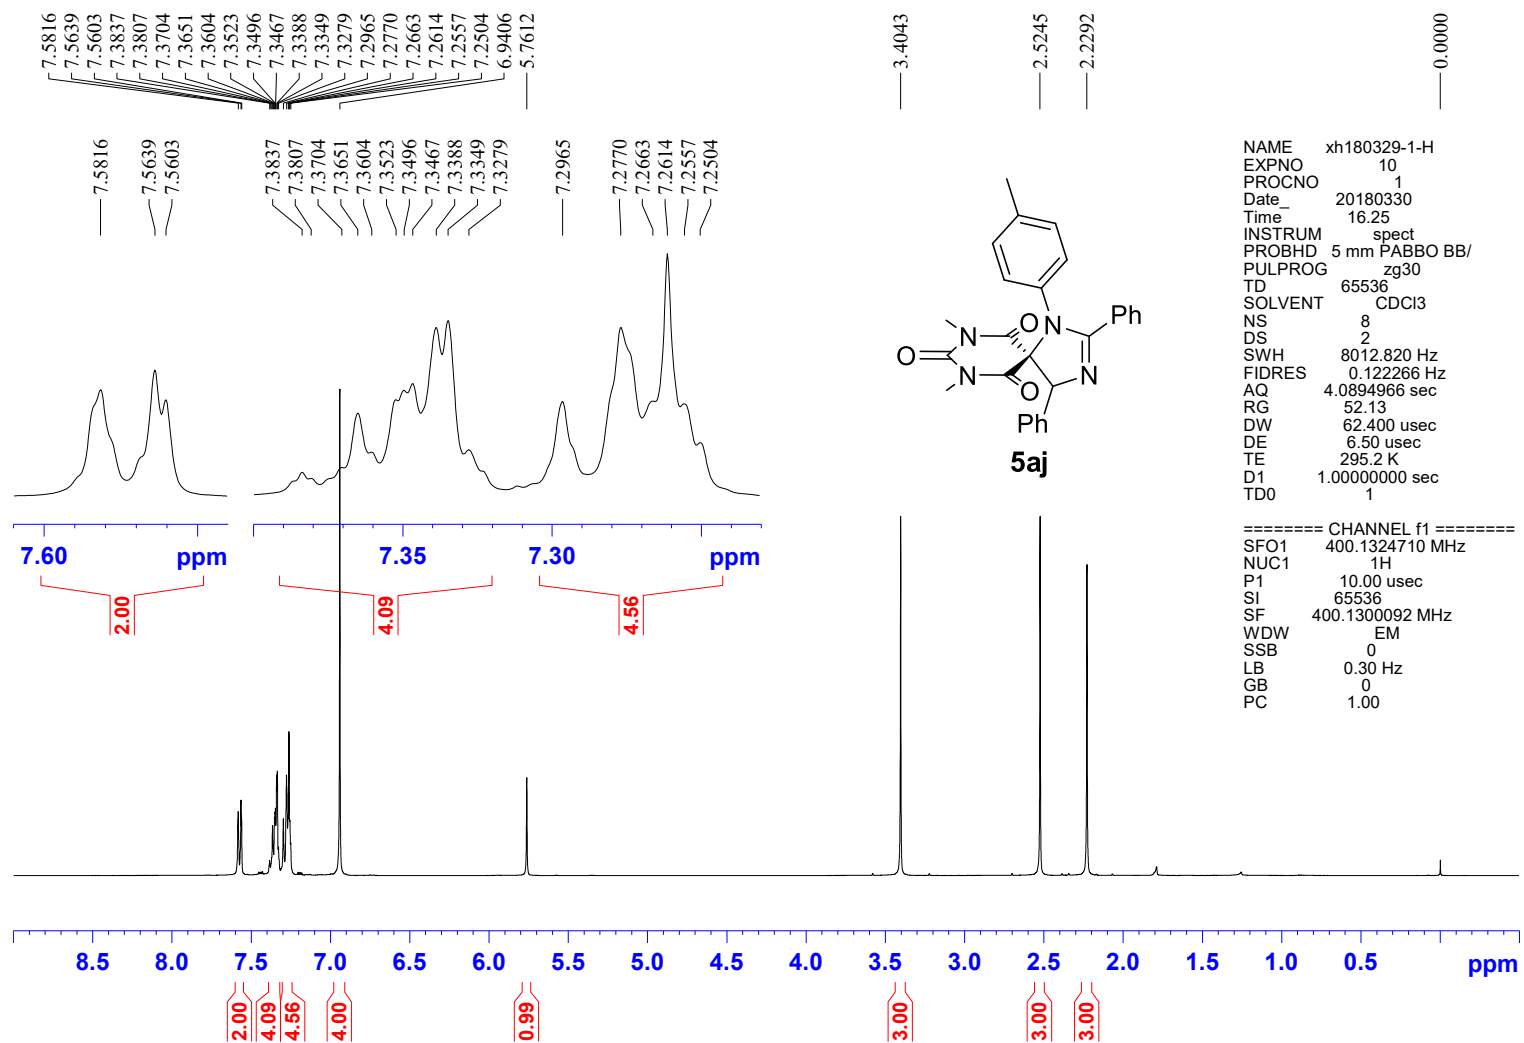

Figure S88. <sup>1</sup>H NMR (400 MHz, CDCl<sub>3</sub>) of compound **5aj**



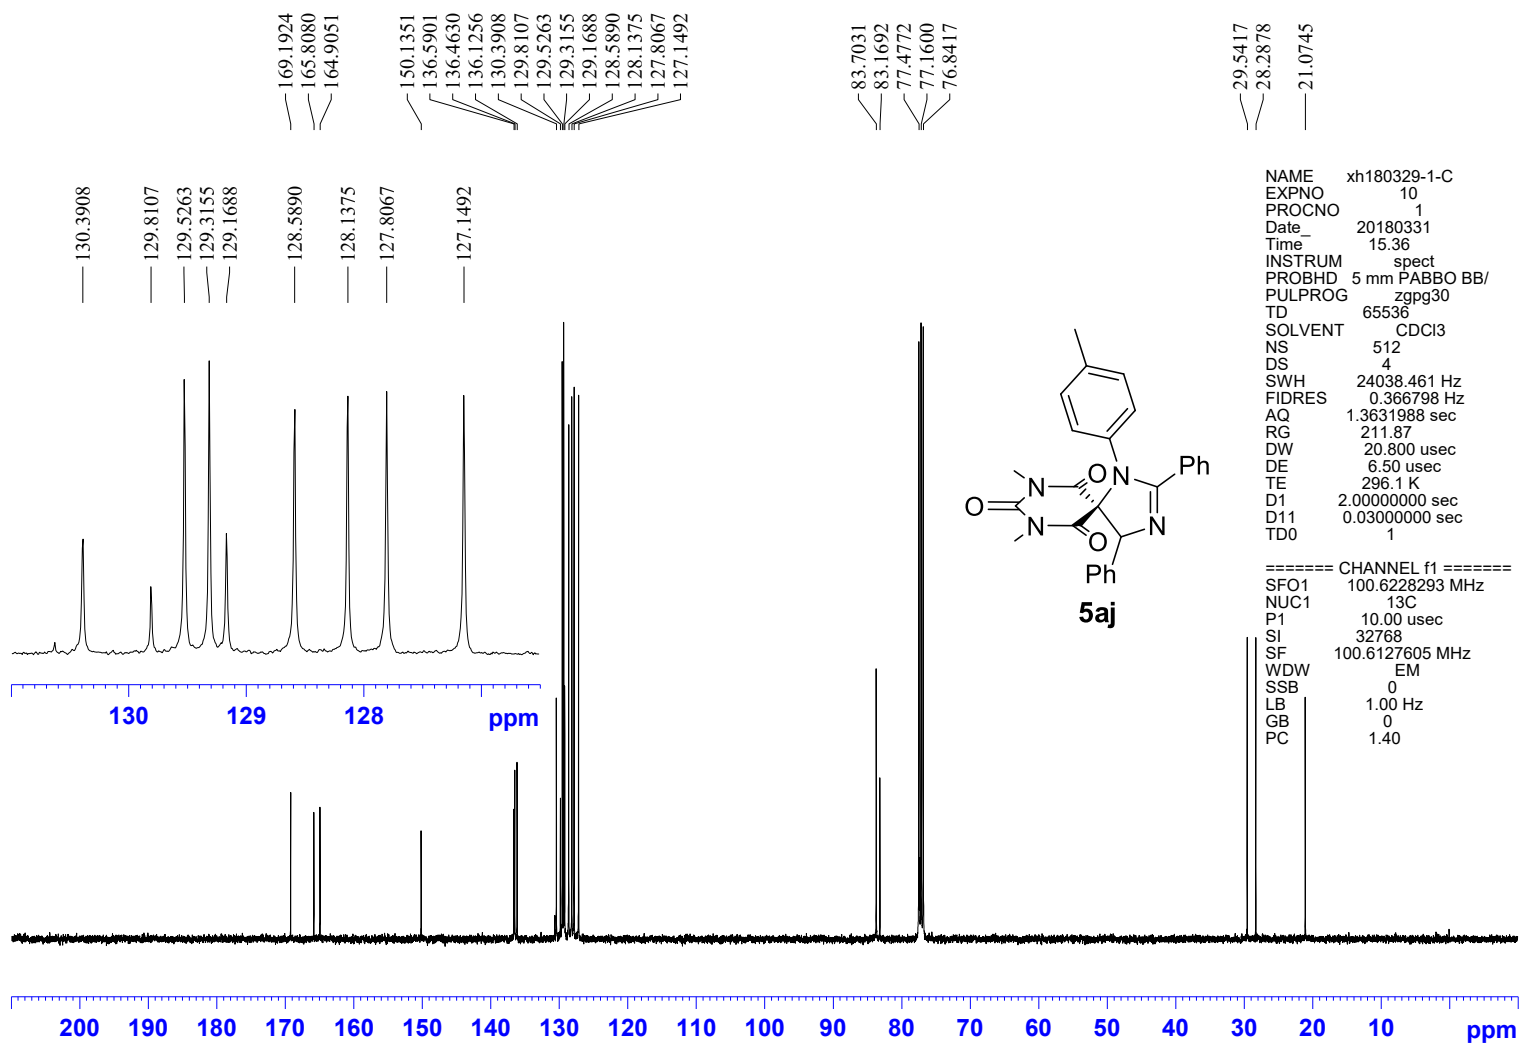

Figure S89. <sup>13</sup>C NMR (101 MHz, CDCl<sub>3</sub>) of compound **5aj**

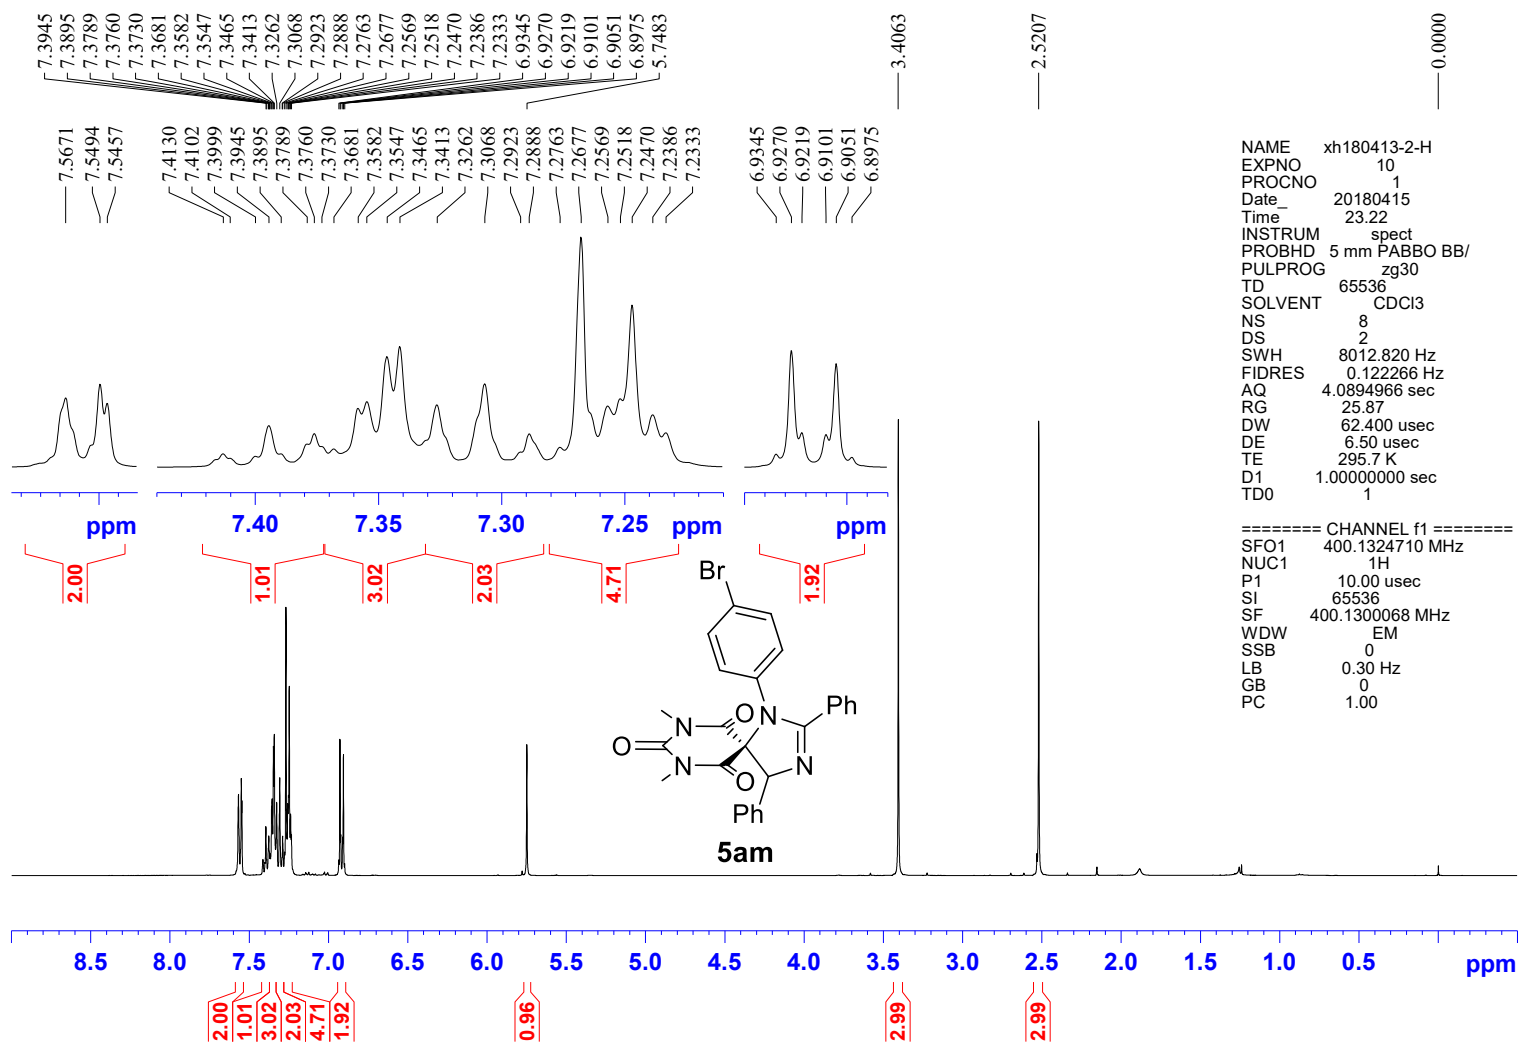

Figure S90. <sup>1</sup>H NMR (400 MHz, CDCl<sub>3</sub>) of compound 5am

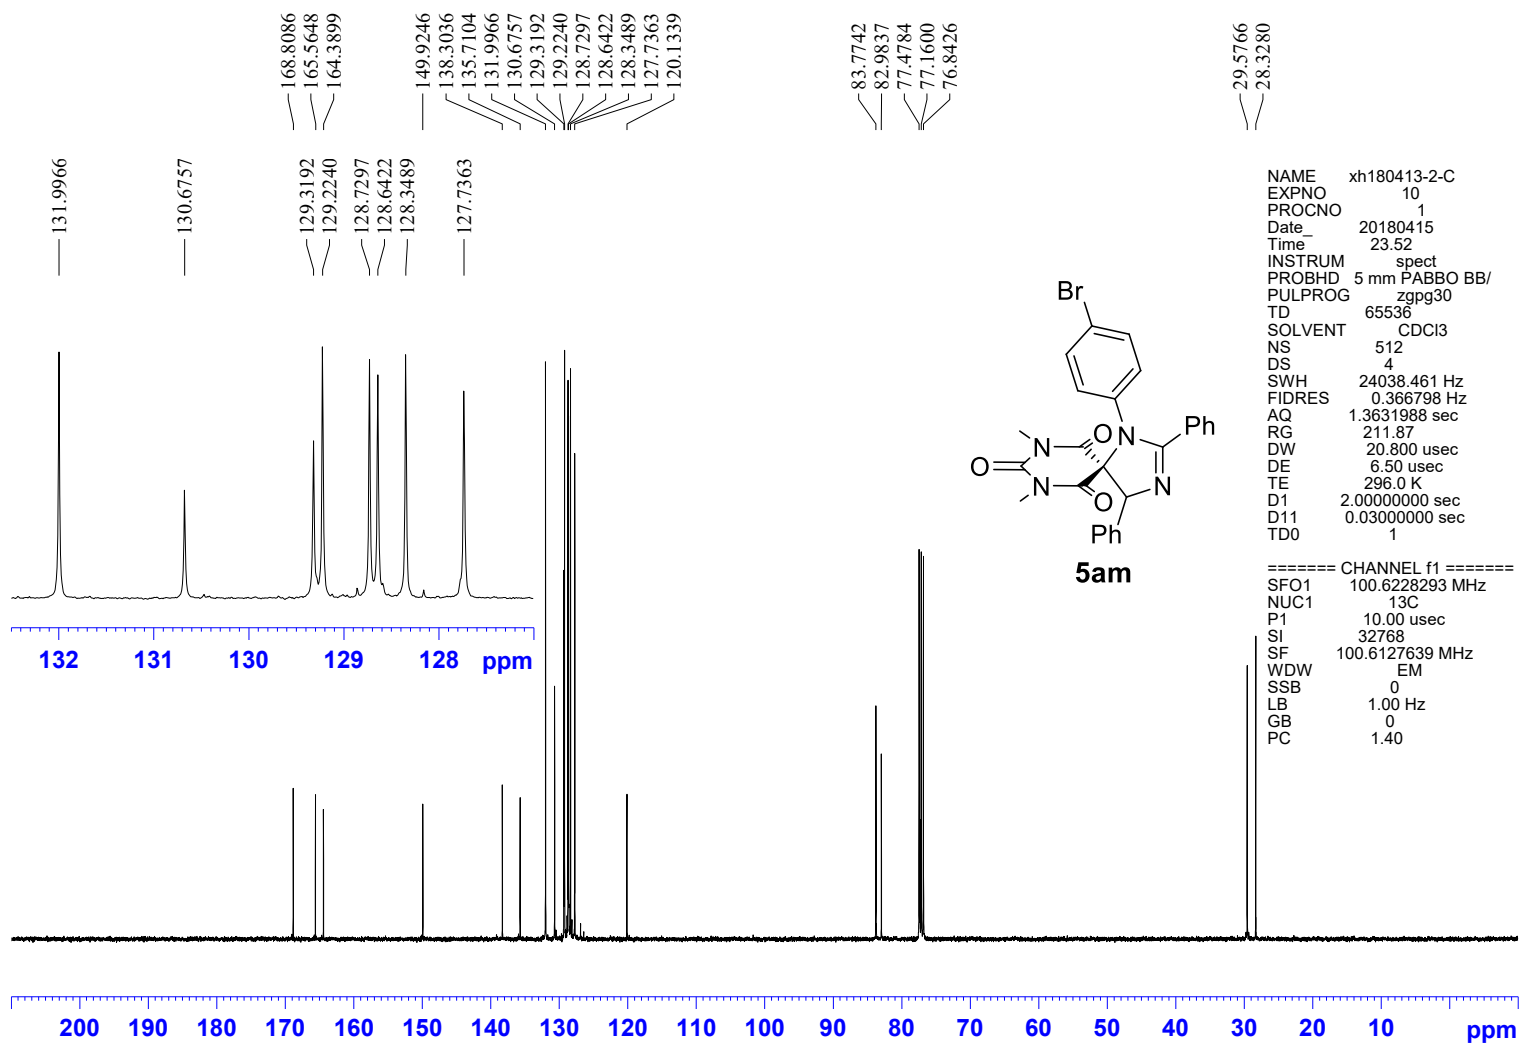

Figure S91. <sup>13</sup>C NMR (101 MHz, CDCl<sub>3</sub>) of compound 5am

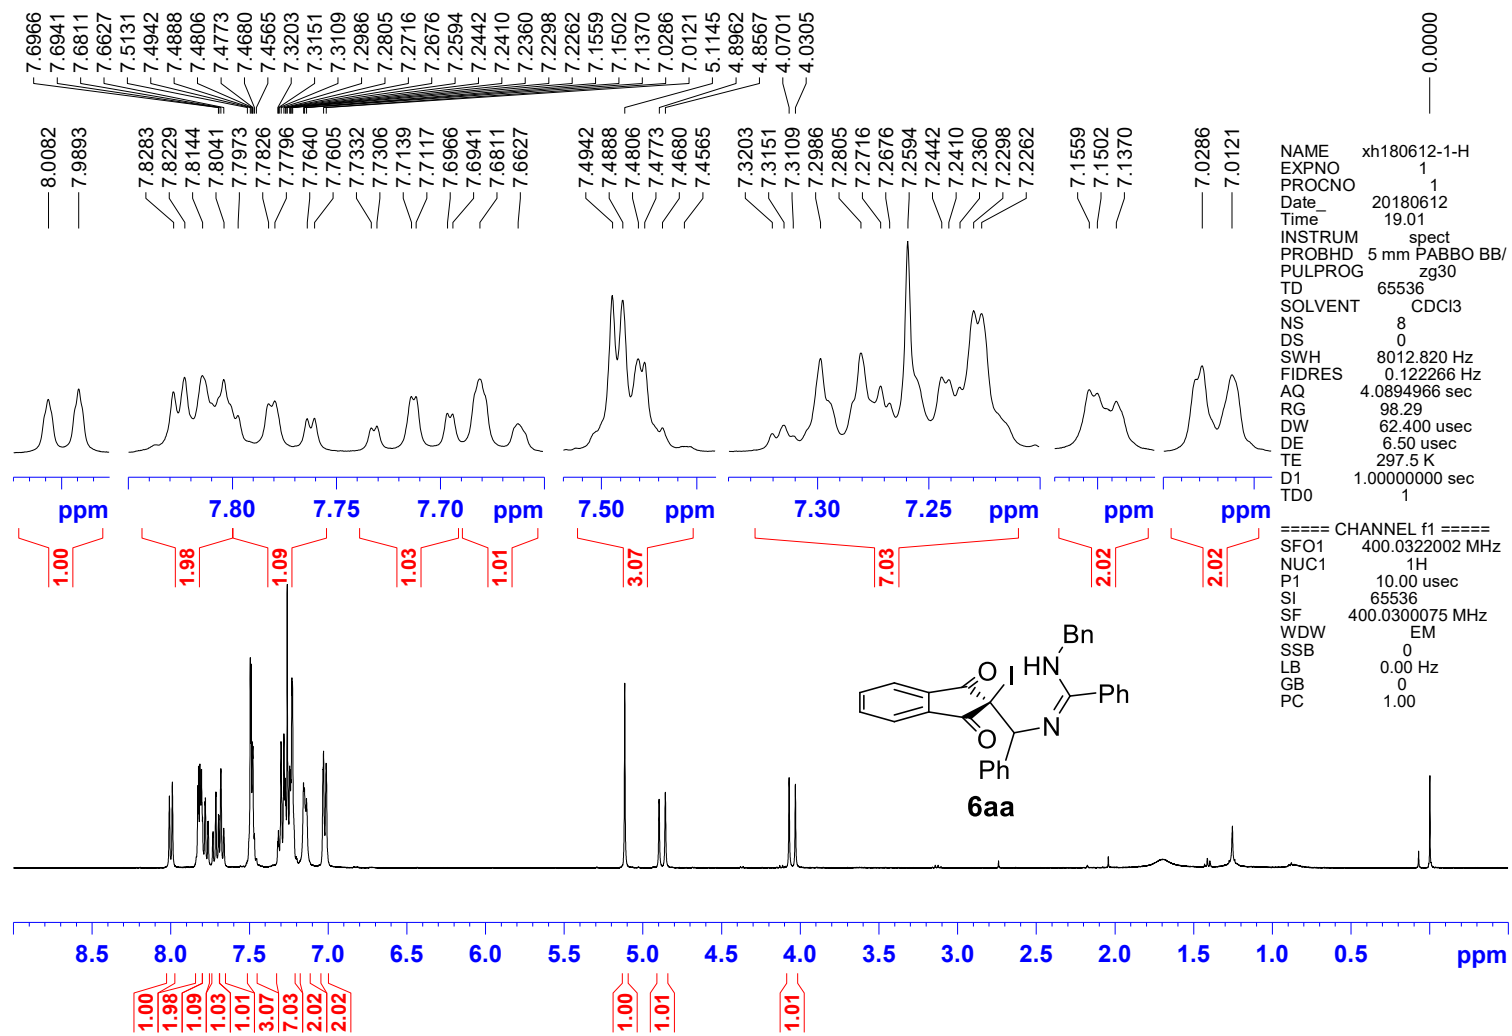

Figure S92.  $^1\text{H}$  NMR (400 MHz,  $\text{CDCl}_3$ ) of compound 6aa

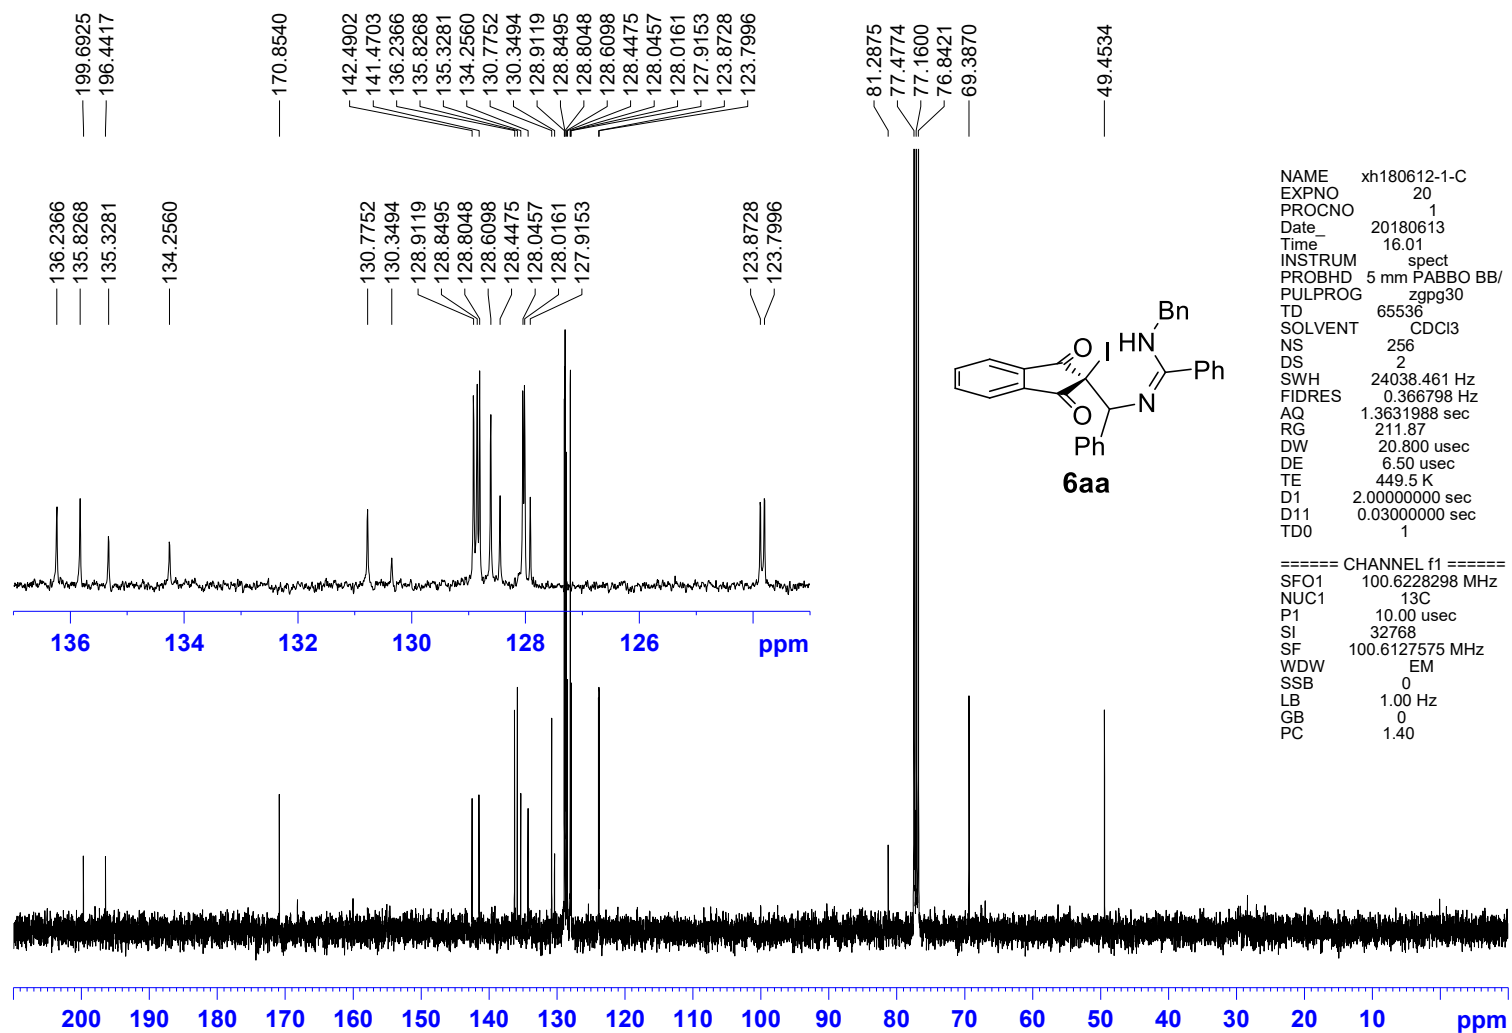

Figure S93. <sup>13</sup>C NMR (101 MHz, CDCl<sub>3</sub>) of compound 6aa

## 6. Single-crystal X-ray crystallography of 3la

Single crystals of **3la** were obtained by slow evaporation from a mixture of acetone/*n*-hexane at 5 °C. Single-crystal X-ray diffraction data were collected on a diffractometer (Gemini S Ultra, Agilent Technologies) equipped with a CCD area detector using graphite-monochromated CuK $\alpha$  radiation ( $\lambda = 1.54184 \text{ \AA}$ ) in the scan range  $9.132 < 2\theta < 142.318^\circ$ . The structure was solved with direct methods using SHELXS-97 and refined with full-matrix least-squares refinement using the SHELXL-97 program within OLEX2. Crystallographic data have been deposited in the Cambridge Crystallographic Data Centre as deposition number CCDC 1829368.

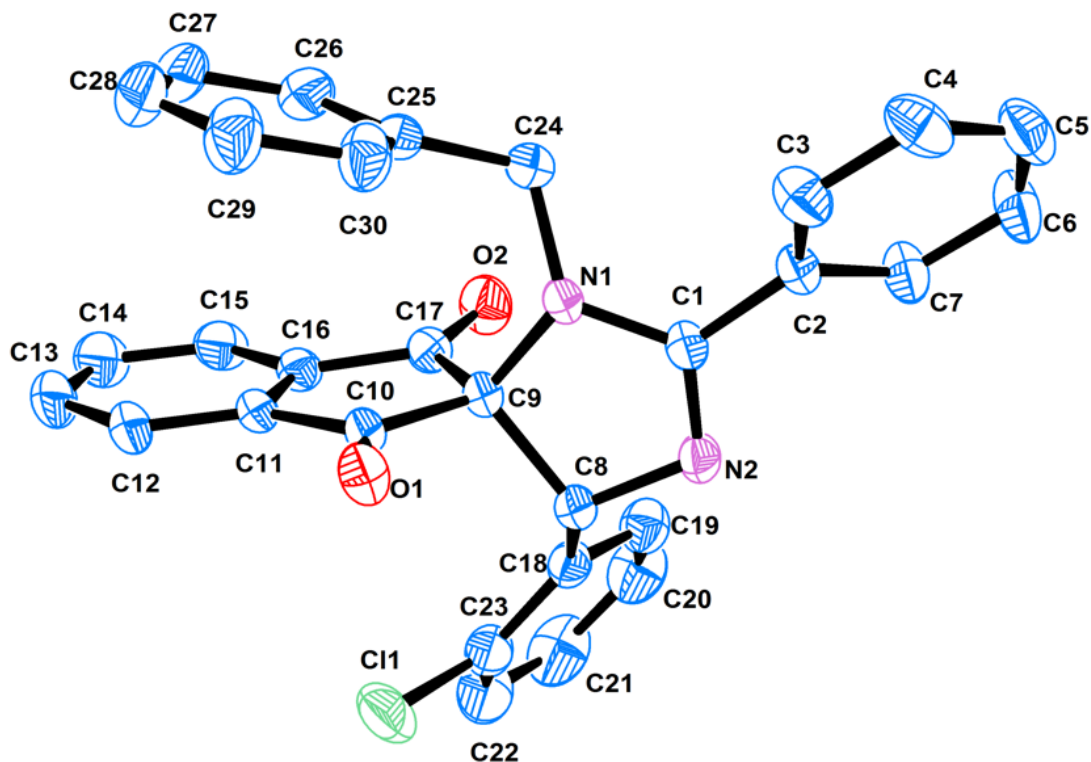

Figure S94. ORTEP Diagrams of 3la with 30% thermal ellipsoids

**Table S1 Crystal data and structure refinement for 3la.**

|                                             |                                                                 |
|---------------------------------------------|-----------------------------------------------------------------|
| Identification code                         | 1829368                                                         |
| Empirical formula                           | C <sub>30</sub> H <sub>21</sub> ClN <sub>2</sub> O <sub>2</sub> |
| Formula weight                              | 476.94                                                          |
| Temperature/K                               | 291(2)                                                          |
| Crystal system                              | triclinic                                                       |
| Space group                                 | P-1                                                             |
| a/Å                                         | 8.5511(3)                                                       |
| b/Å                                         | 10.4286(3)                                                      |
| c/Å                                         | 14.3935(4)                                                      |
| α/°                                         | 88.875(2)                                                       |
| β/°                                         | 87.601(2)                                                       |
| γ/°                                         | 68.209(3)                                                       |
| Volume/Å <sup>3</sup>                       | 1190.78(7)                                                      |
| Z                                           | 2                                                               |
| ρ <sub>calc</sub> /cm <sup>3</sup>          | 1.330                                                           |
| μ/mm <sup>-1</sup>                          | 1.664                                                           |
| F(000)                                      | 496.0                                                           |
| Crystal size/mm <sup>3</sup>                | 0.310 × 0.250 × 0.240                                           |
| Radiation                                   | CuKα (λ = 1.54184)                                              |
| 2θ range for data collection/°              | 9.132 to 142.318                                                |
| Index ranges                                | -10 ≤ h ≤ 9, -12 ≤ k ≤ 11, -17 ≤ l ≤ 17                         |
| Reflections collected                       | 7629                                                            |
| Independent reflections                     | 4450 [R <sub>int</sub> = 0.0172, R <sub>sigma</sub> = 0.0180]   |
| Data/restraints/parameters                  | 4450/0/316                                                      |
| Goodness-of-fit on F <sup>2</sup>           | 1.040                                                           |
| Final R indexes [I ≥ 2σ (I)]                | R <sub>1</sub> = 0.0464, wR <sub>2</sub> = 0.1270               |
| Final R indexes [all data]                  | R <sub>1</sub> = 0.0501, wR <sub>2</sub> = 0.1306               |
| Largest diff. peak/hole / e Å <sup>-3</sup> | 0.16/-0.46                                                      |
